# Supplementary material for: Non-covalent S···O interactions control conformation in a scaffold that disrupts islet amyloid polypeptide fibrillation
Source: PubMed Central journal article supplement — Chem Sci. 2016 Jul 1;7(10):6435–9. doi: 10.1039/c6sc00756b (PMC5363787; doi:10.1039/c6sc00756b), 2016-07-01
Supplement: SC-007-C6SC00756B-s001.pdf [file SC-007-C6SC00756B-s001.pdf]

Supporting information for

## Non-Covalent S...O Interactions Control Conformation in a Scaffold that Disrupts Islet Amyloid Polypeptide Fibrillation

Hayden Peacock, Jinghui Luo, Tohru Yamashita, James Luccarelli, Sam Thompson\* and Andrew D. Hamilton\*

---

Chemistry Research Laboratory, University of Oxford

12 Mansfield Road, Oxford, OX1 3TA, U.K.

andrew.hamilton@chem.ox.ac.uk, sam.thompson@chem.ox.ac.uk

### Table of contents

|                                                                                                                                        |    |
|----------------------------------------------------------------------------------------------------------------------------------------|----|
| 1. Supplementary figures                                                                                                               | 2  |
| 2. Details of Synthesis                                                                                                                | 5  |
| 5-Nitrobenzo[d]thiazol-2-amine (1)                                                                                                     | 6  |
| 2-(( <i>tert</i> -Butoxycarbonyl)(5-(3-(3-(carboxymethyl)thiophen-2-yl)ureido)-4-ethylbenzo[d]thiazol-2-yl)amino)acetic acid (21)      | 7  |
| 2-(( <i>tert</i> -Butoxycarbonyl)(5-(3-(3-(carboxymethyl)thiophen-2-yl)ureido)-4-propylbenzo[d]thiazol-2-yl)amino)acetic acid (20)     | 12 |
| 3-(2-(3-(2-((2-Carboxyethyl)(ethoxycarbonyl)amino)-4-propylbenzo[d]thiazol-5-yl)ureido)thiophen-3-yl)propanoic acid (22)               | 14 |
| 3-(2-(3-(2-(( <i>tert</i> -Butoxycarbonyl)(2-carboxyethyl)amino)-4-propylbenzo[d]thiazol-5-yl)ureido)thiophen-3-yl)propanoic acid (19) | 22 |
| 3-(2-(3-(2-((2-Carboxyethyl)(ethoxycarbonyl)amino)benzo[d]thiazol-5-yl)ureido)thiophen-3-yl)propanoic acid (23)                        | 26 |
| Ethyl 2-(3-(2-(( <i>tert</i> -Butoxycarbonyl)(methyl)amino)-4-iodobenzo[d]thiazol-5-yl)ureido)-5-ethylthiophene-3-carboxylate (24)     | 28 |
| 3. Conformational analysis                                                                                                             | 32 |
| X-ray crystallography                                                                                                                  | 32 |
| NMR spectroscopy                                                                                                                       | 32 |
| 4. IAPP Experimental Procedures                                                                                                        | 34 |
| Thioflavin T assay                                                                                                                     | 34 |
| Imaging                                                                                                                                | 35 |
| Circular dichroism                                                                                                                     | 35 |
| 5. Computational modeling                                                                                                              | 35 |
| 6. NMR Spectra                                                                                                                         | 40 |
| 7. References                                                                                                                          | 82 |

## 1. Supplementary figures

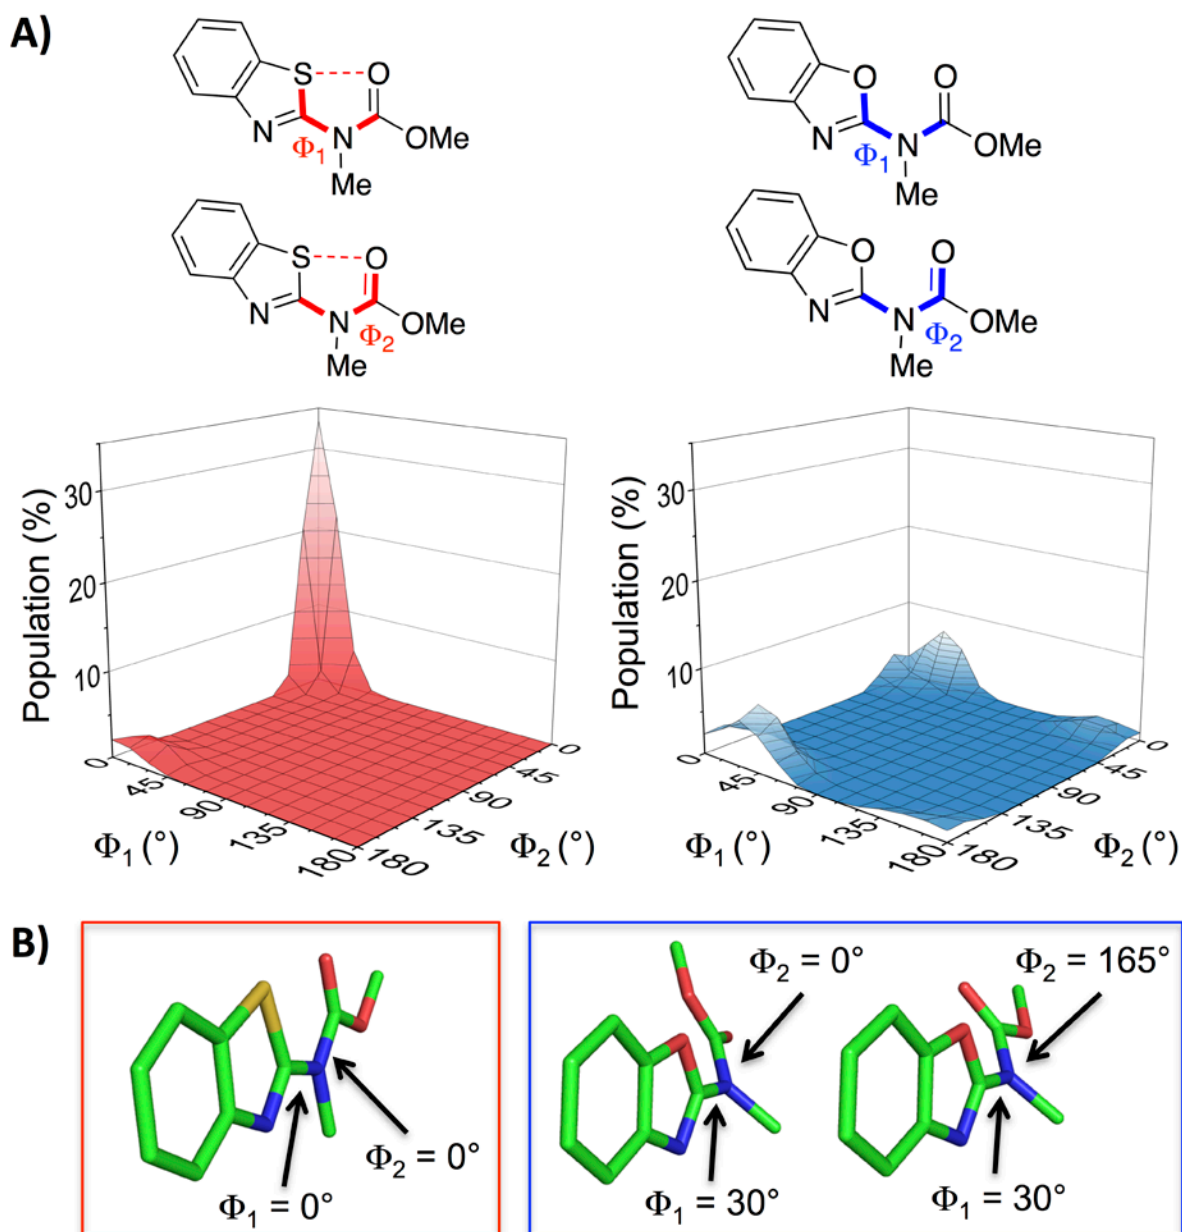

**Supplementary Figure 1** [Enlarged version of **Figure 1** from the main manuscript] **A)** Dihedral contour plots of a model system depicting the difference in conformational preference between benzothiazole and benzoxazole rings. The relevant dihedral angles are depicted in bold and the plots show the Boltzmann population of conformers at 298 K. **B)** The model systems displayed in their most highly populated conformations (benzothiazole system in the red box and benzoxazole system in the blue box). The calculations were performed at the M06-2X/6-31G(d,p) level of theory with implicit aqueous solvent (see section 5).

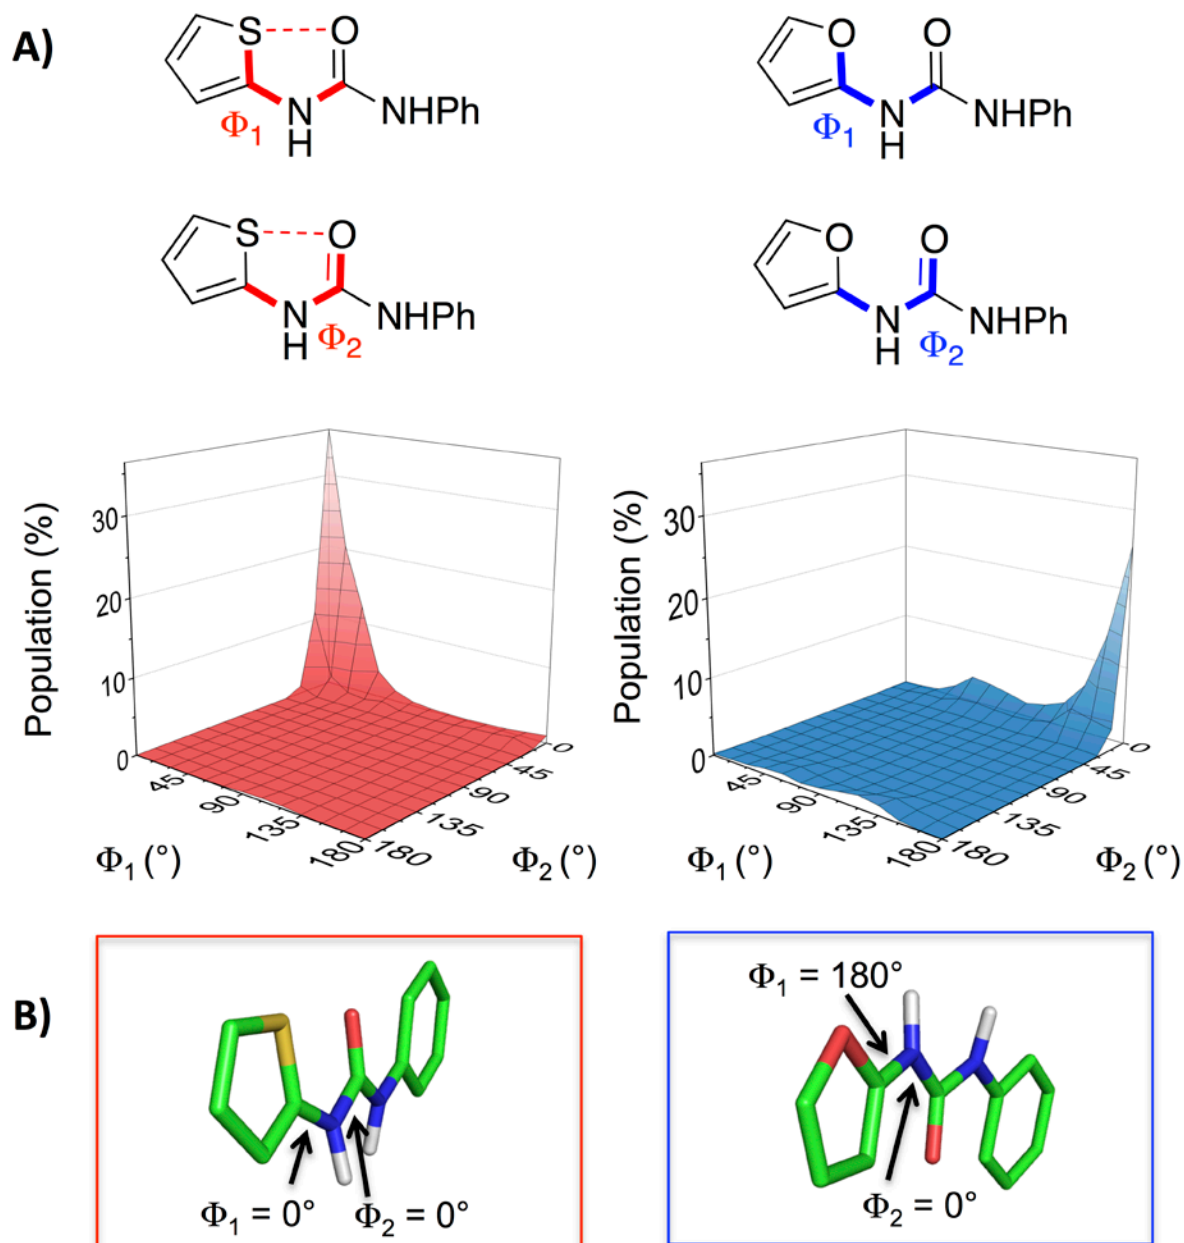

**Supplementary Figure 2.** Dihedral contour plots of an alternative model system depicting the difference in conformational preference between thiophene and furan rings. The relevant dihedral angles are depicted in bold and the plots show the Boltzmann population of conformers at 298 K. B) The model systems displayed in their most highly populated conformations. The calculations were performed at the M06-2X/6-31G(d,p) level of theory with implicit aqueous solvent (see section 5).

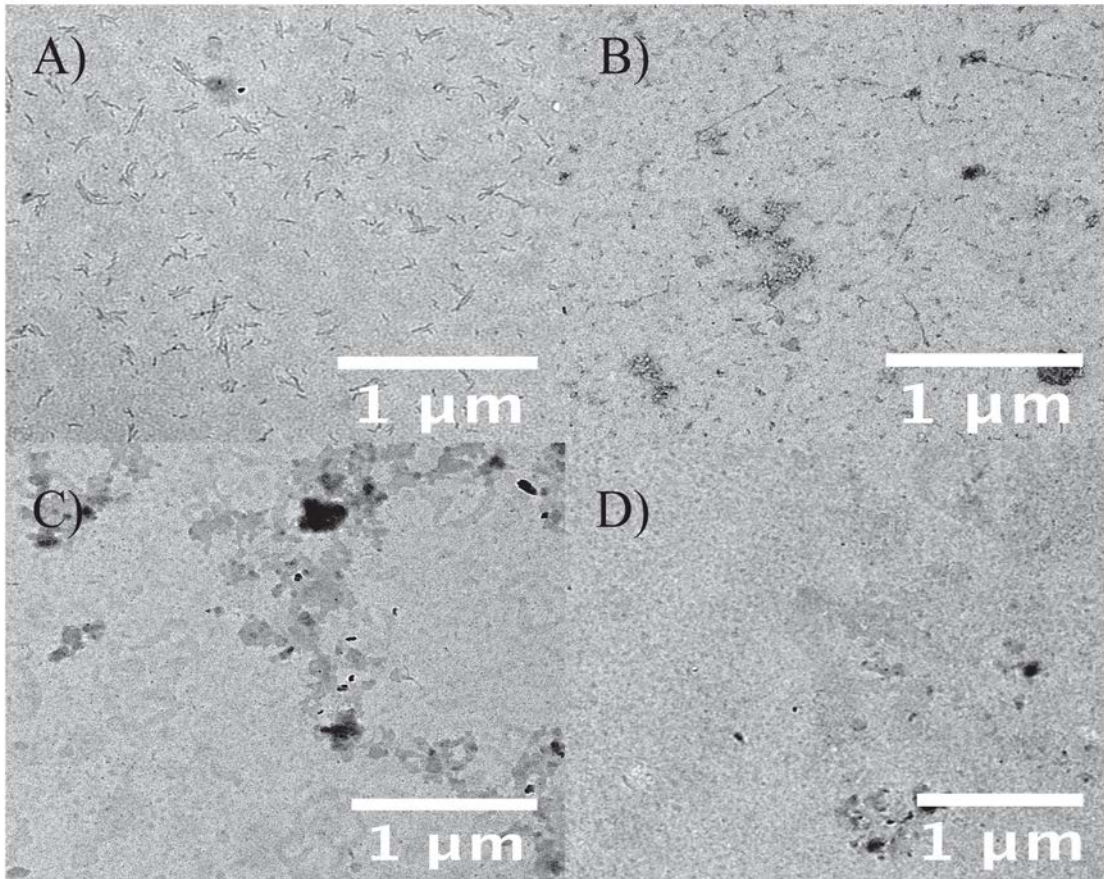

**Supplementary Figure 3.** Electron microscope images of IAPP aggregates in the absence (**A**); and presence of: **21** (**B**); **19** (**C**); and **22** (**D**). The samples were taken from the wells after ThT assays.

## 2. Details of Synthesis

Reactions were carried out under a nitrogen or argon atmosphere in oven-dried glassware unless otherwise stated. Standard inert atmosphere techniques were used in handling all air and moisture sensitive reagents. Tetrahydrofuran (THF), dichloromethane (DCM), *N,N'*-dimethylformamide (DMF) and methanol (MeOH) were anhydrous (dried on an MB-SPS-800 solvent purification system). Other solvents and reagents were used directly as received from commercial suppliers. All aqueous solutions were saturated unless specified otherwise.

Flash column chromatography was carried out using Merck 60 silica gel. Thin-layer chromatography was carried out using Merck Kieselgel 60 F254 (230-400 mesh) fluorescent treated silica, visualized under UV light (254 nm) or by staining with aqueous potassium permanganate solution.

<sup>1</sup>H and <sup>13</sup>C NMR spectra were recorded using a Bruker spectrometer (400, 500 or 600 MHz) running TopSpin™ software and are quoted in ppm for measurement against residual solvent peaks. Chemical shifts ( $\delta$ ) are given in parts per million (ppm), and coupling constants ( $J$ ) are given in Hertz (Hz). The <sup>1</sup>H NMR spectra are reported as follows:  $\delta$  (number of protons, multiplicity, coupling constant). Multiplicity is abbreviated as follows: s = singlet, d = doublet, t = triplet, q = quartet, quint. = quintet, m = multiplet, br = broad. IR spectra were recorded on a Bruker Tensor 27 FT-IR spectrometer from a thin film deposited onto a diamond ATR module. Only selected maximum absorbances ( $\epsilon_{\text{max}}$ ) of the most intense peaks are reported ( $\text{cm}^{-1}$ ). High-resolution mass spectra were recorded by the internal service at the Department of Chemistry, University of Oxford, using a Bruker MicroTof (ESI) or an Agilent 7200 Accurate Mass Q-TOF GC/MS with an MSD Direct Inlet Probe (ammonia CI). Compound names are those generated by ChemBioDraw™ (CambridgeSoft) following IUPAC nomenclature.

## 5-Nitrobenzo[d]thiazol-2-amine (1)

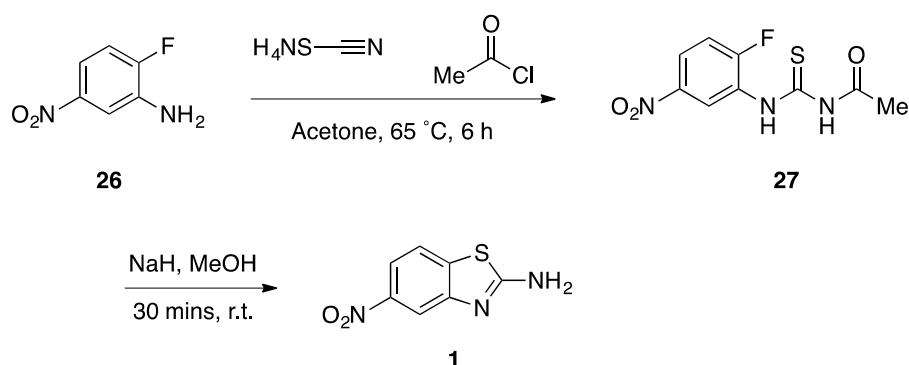

## *N*-((2-Fluoro-5-nitrophenyl)carbamothioyl)acetamide (27)

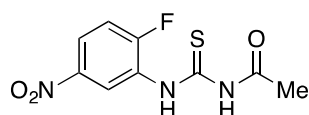

Acetyl chloride (8.0 mL, 11 mmol) was added to a solution of ammonium thiocyanate (8.60 g, 11.3 mmol) in acetone (125 mL) and the mixture was stirred for 1 h. The solids were removed by filtration. 2-Fluoro-5-nitroaniline **26** (15.9 g, 10.2 mmol) was added to the filtrate, and this solution was heated at 65 °C for 6 h. The solids were isolated by filtration, washed with diethyl ether, hexane and acetone to give *the title compound* **27** (16.1 g, 62.6 mmol, 61 % yield);  $\delta_{\text{H}}$  (400 MHz, DMSO- $d_6$ ) 12.74 (1H, s), 11.84 (1H, s), 9.25 (1H, dd,  $J=6.6$ , 2.69), 8.15 - 8.28 (1H, m), 7.62 (1H, t,  $J=9.5$ ), 2.19 (3H, s);  $\delta_{\text{C}}$  (101 MHz, DMSO- $d_6$ ) 180.2, 173.6, 158.8 (d,  $J=257$ ) 143.6, 127.7, 123.6, 121.4, 117.1, 24.2;  $\delta_{\text{F}}\{^1\text{H}\}$  (377 MHz, DMSO- $d_6$ ) - 113.7; IR 3201, 2981, 1696, 1347, 1236, 742; HRMS (ESI) calculated for  $\text{C}_9\text{H}_7\text{FN}_3\text{O}_3\text{S}$  [(M-H) $^-$ ]: 256.0198 found 256.0195.

## 5-Nitrobenzo[d]thiazol-2-amine (1)

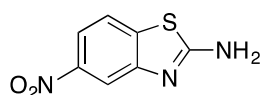

Sodium hydride (3.37 g, 84.3 mmol, 60 % w/w dispersion in mineral oil) was cautiously added portion-wise to methanol (84 mL) and the resultant mixture stirred for 30 mins. *N*-((2-Fluoro-5-nitrophenyl)carbamothioyl)acetamide **27** (16.1 g, 62.6 mmol) was added as a solution in methanol (690 mL). The mixture was allowed to stand for 16 h, the solids were isolated by filtration and washed with diethyl ether-methanol to yield *the title compound* **1** (12.0 g, 61.5 mmol, 98% yield);  $\delta_{\text{H}}$  (400 MHz, DMSO- $d_6$ ) 8.04 (1 H, d,  $J=2.2$ ) 7.97 (2 H, brs) 7.90 - 7.94 (1 H, m) 7.83 - 7.89 (1 H, m);  $\delta_{\text{C}}$  (101 MHz, DMSO- $d_6$ ) 169.1, 153.2, 146.1, 139.1, 121.6, 115.4, 111.4; IR 3421, 2918, 2850, 1653, 1338, ; HRMS (ESI) calculated for  $\text{C}_7\text{H}_6\text{N}_3\text{O}_2\text{S}$  [(M+H) $^+$ ]: 196.0175 found 196.0176.

## 2-((*tert*-Butoxycarbonyl)(5-(3-(3-(carboxymethyl)thiophen-2-yl)ureido)-4-ethylbenzo[*d*]thiazol-2-yl)amino)acetic acid (**21**)

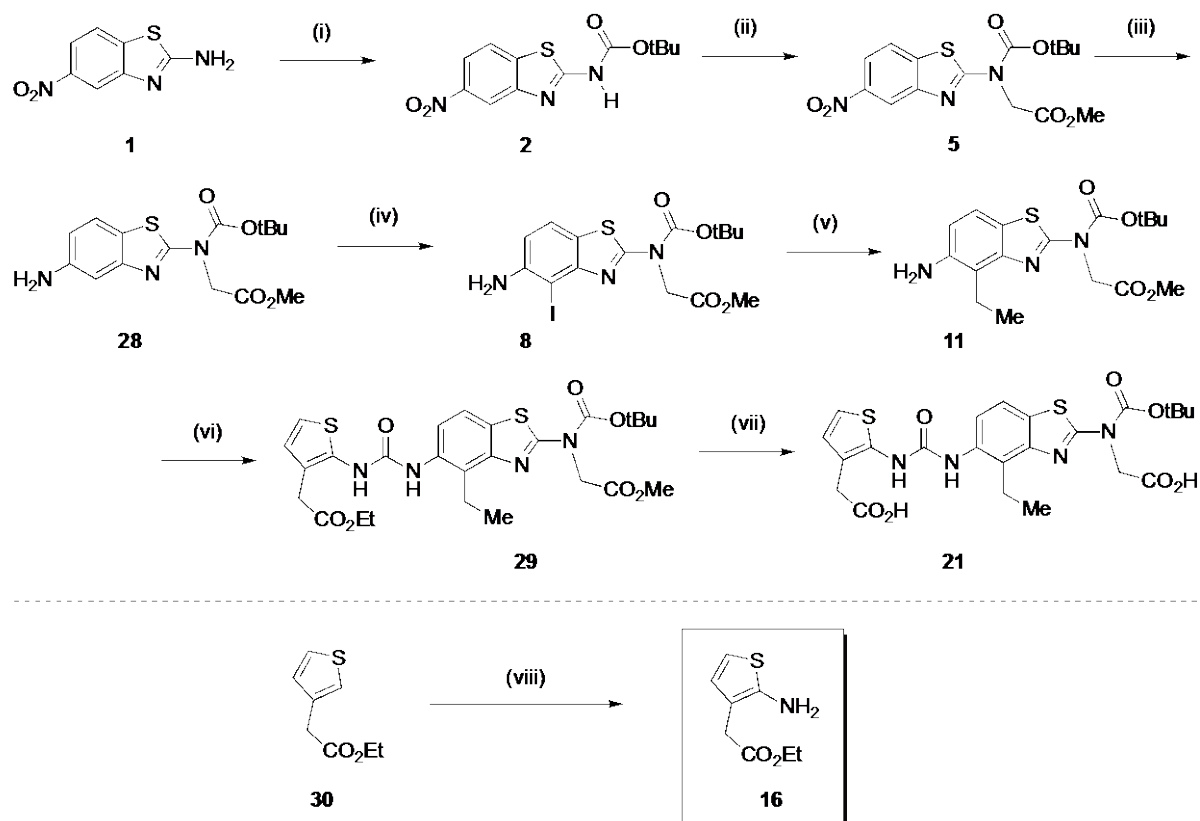

(i) NaH, DMF, Boc<sub>2</sub>O, 60 °C, 4 h; (ii) NaH, DMF; methyl bromoacetate, 0 °C to r.t.; (iii) H<sub>2</sub>, Pd/C, THF-MeOH, r.t.; (iv) NIS, MeCN, 0 °C; (v) (1) potassium vinyltrifluoroborate, PdCl<sub>2</sub>(dppf), Et<sub>3</sub>N, EtOH, reflux; (2) H<sub>2</sub>, Pd/C, THF-MeOH, r.t.; (vi) ethyl 2-(2-aminothiophen-3-yl)acetate **16**, phosgene, Et<sub>3</sub>N, CH<sub>2</sub>Cl<sub>2</sub>, 0 °C; (vii) aq. NaOH, THF-MeOH, 60 °C; (viii) (1) NH<sub>4</sub>NO<sub>3</sub>, TFAA CHCl<sub>3</sub>, 10–20 °C; (2) Fe, aq. HCl, EtOH, reflux; Boc = *t*-BuOCO, Me = methyl, Et = ethyl, *t*-Bu = *tert*-butyl, DMF = *N,N*-dimethylformamide, dppf = 1,1'-bis(diphenylphosphino)ferrocene, THF = tetrahydrofuran, NIS = *N*-iodosuccinimide, TFAA = trifluoroacetic anhydride r.t. = room temperature, Ac = CH<sub>3</sub>CO.

## *tert*-Butyl (5-nitrobenzo[*d*]thiazol-2-yl)carbamate (**2**)

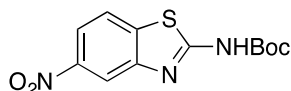

4-(Dimethylamino)pyridine (48 mg, 0.4 mmol) and di-*tert*-butyl dicarbonate (13.1 g, 60.0 mmol) were added to a solution of 5-nitrobenzo[*d*]thiazol-2-amine **1** (7.80 g, 40.0 mmol) in *N,N*-dimethylformamide (300 mL) and heated at 60 °C for 4 h. Water (80 mL) and methanol (60 mL) were added and the mixture stirred for 5 mins. Water (200 mL) was added and the resulting precipitate was isolated by filtration, washed with water and petroleum ether to yield *the title compound* **2** as a pale yellow solid. (5.60 g, 19.0 mmol, 47 % yield); δ<sub>H</sub> (400 MHz, DMSO-*d*<sub>6</sub>) 12.21 (1 H, brs), 8.42 (1 H, d, *J*=2.2), 8.23 (1 H, d, *J*=8.8), 8.11 (1 H, dd, *J*=8.80, 2.2), 1.52 (9 H, s); δ<sub>C</sub> (101 MHz, DMSO-*d*<sub>6</sub>) 162.9, 152.9, 149.4, 146.3, 139.0, 122.7, 117.5,

114.7, 82.4, 27.8; IR 3055, 1712, 1517; HRMS (ESI) calculated for C<sub>12</sub>H<sub>14</sub>N<sub>3</sub>O<sub>4</sub>S [(M+H)<sup>+</sup>]: 296.0700 found 296.0700.

### Methyl 2-((*tert*-butoxycarbonyl)(5-nitrobenzo[d]thiazol-2-yl)amino)acetate (**5**)

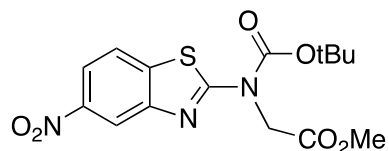

Sodium hydride (488 mg, 12.2 mmol, 60 % w/w dispersion in mineral oil) was added to a solution of *tert*-butyl (5-nitrobenzo[d]thiazol-2-yl)carbamate<sup>1</sup> **2** (3.00 g, 10.2 mmol) in *N,N*-dimethylformamide (30 mL) at 0 °C and the mixture was stirred for 15 min. Then methyl bromoacetate (1.45 mL, 15.3 mmol) was added and the mixture was warmed to room temperature and stirred for 1 h. The mixture was diluted with water and extracted with ethyl acetate. The organic layer was washed twice with brine, dried (magnesium sulfate) and concentrated *in vacuo*. The crude residue was purified by column chromatography (1:19 to 1:3 ethyl acetate: hexane) to give the *title compound* **5** as a pale yellow solid (2.58 g, 7.02 mmol, 69 % yield);  $\delta_{\text{H}}$  (400 MHz, CDCl<sub>3</sub>) 8.62 (1H, d, *J* 2.1), 8.17 (1H, dd, *J* 8.7, 2.1), 7.90 (1H, d, *J* 8.7), 5.02 (2H, s), 3.84 (3H, s), 1.62 (9H, br s);  $\delta_{\text{C}}$  (101 MHz, CDCl<sub>3</sub>) 168.7, 163.0, 157.4, 148.8, 146.6, 140.6, 121.2, 118.1, 116.5, 85.3, 52.5, 48.1, 28.0; IR 1747, 1720, 1504, 1211, 1142, 742; HRMS (ESI) calculated for C<sub>15</sub>H<sub>18</sub>N<sub>3</sub>O<sub>6</sub>S [(M+H)<sup>+</sup>]: 368.0910 found 368.0899.

### Methyl 2-((5-aminobenzo[d]thiazol-2-yl)(*tert*-butoxycarbonyl)amino)acetate (**28**)

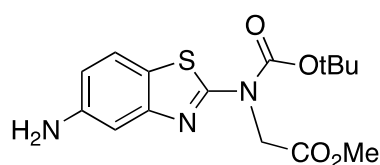

A mixture of nitro compound **5** (4.70 g, 12.8 mmol) and palladium on carbon (10 % w/w, 2.00 g, 1.89 mmol Pd) in tetrahydrofuran (20 mL) and methanol (20 mL) was stirred under a hydrogen atmosphere (balloon) for 2.5 h. Filtration and concentration *in vacuo* afforded a crude solid, which was washed with diethyl ether to yield the *title compound* **28** as a pale brown solid (3.21 g, 9.51 mmol, 74 % yield);  $\delta_{\text{H}}$  (400 MHz, CDCl<sub>3</sub>) 7.42 (1H, d, *J* 8.2), 6.99 (1H, d, *J* 1.8), 6.60 (1H, dd, *J* 8.4, 2.0), 4.89 (2H, s), 3.69 (3H, s), 3.65 (2H, br s), 1.50 (9H, br s);  $\delta_{\text{C}}$  (101 MHz, CDCl<sub>3</sub>) 169.2, 161.3, 152.4, 150.0, 144.8, 123.9, 121.2, 113.1, 106.9, 84.1, 52.3, 48.0, 28.0; IR 2979, 1740, 1410, 1243, 1192, 844; HRMS (ESI) calculated for C<sub>15</sub>H<sub>20</sub>N<sub>3</sub>O<sub>4</sub>S [(M+H)<sup>+</sup>]: 338.1169 found 338.1153.



### Methyl 2-((5-amino-4-iodobenzo[d]thiazol-2-yl)(tert-butoxycarbonyl)amino)acetate (**8**)

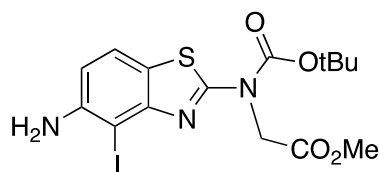

*N*-Iodosuccinimide (2.14 g, 9.52 mmol) was added to a solution of aniline **28** (3.21 g, 9.52 mmol) in acetonitrile (45 mL) at 0 °C. The mixture was warmed to room temperature and stirred for 10 min. Aqueous sodium thiosulfate was added and the mixture was extracted with ethyl acetate. The organic extract was concentrated *in vacuo* and the resultant residue was purified by column chromatography (1:19 to 1:9 ethyl acetate: hexane) to yield the *title compound 8* as a pale brown solid (4.37 g, 9.43 mmol, 99 % yield);  $\delta_{\text{H}}$  (400 MHz,  $\text{CDCl}_3$ ) 7.46 (1H, d, *J* 8.2), 6.74 (1H, d, *J* 8.4), 5.02 (2H, s), 4.25 (2H, br s), 3.83 (3H, s), 1.60 (9H, s);  $\delta_{\text{C}}$  (101 MHz,  $\text{CDCl}_3$ ) 169.1, 160.4, 152.2, 150.7, 146.0, 121.5, 120.9, 112.0, 84.4, 77.2, 52.3, 48.2, 28.0; IR 1740, 1412, 1148, 1007, 764; HRMS (ESI) calculated for  $\text{C}_{15}\text{H}_{19}\text{IN}_3\text{O}_4\text{S}$  [(M+H)<sup>+</sup>]: 464.0135 found 464.0122.

### Methyl 2-((5-amino-4-ethylbenzo[d]thiazol-2-yl)(tert-butoxycarbonyl)amino)acetate (**11**)

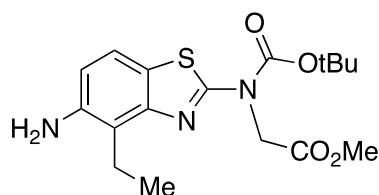

A mixture of iodide **8** (1.50 g, 3.24 mmol), potassium vinyltrifluoroborate (2.17 g, 16.2 mmol),  $\text{PdCl}_2(\text{dppf})$  (237 mg, 0.324 mmol) and triethylamine (1.36 mL, 9.72 mmol) in ethanol (20 mL) was stirred at reflux under Ar for 3 h. The mixture was diluted with water and extracted twice with ethyl acetate. The combined organic layers were concentrated *in vacuo*. The crude product was purified by column chromatography (1:19 to 1:9 ethyl acetate: hexane). The product was dissolved in tetrahydrofuran (5 mL) and methanol (5 mL). To this mixture was added palladium on carbon (10 % w/w, 500 mg, 0.47 mmol Pd) and the mixture was stirred under hydrogen atmosphere (balloon pressure) for 0.5 h. The mixture was filtered, and concentration *in vacuo* afforded the crude product, which was purified by column chromatography (1:4 to 2:3 ethyl acetate : hexane) to yield *the title compound 11* as a white solid (500 mg, 1.37 mmol, 42 % yield);  $\delta_{\text{H}}$  (400 MHz,  $\text{CDCl}_3$ ) 7.30 (1H, d, *J* 8.2), 6.62 (1H, d, *J* 8.4), 4.89 (2H, s), 3.69 (3H, s), 3.60 (2H, br s), 2.86 (2H, q, *J* 7.6), 1.51 (9H, br s), 1.12 (3H, t, *J* 7.6);  $\delta_{\text{C}}$  (101 MHz,  $\text{CDCl}_3$ ) 169.4, 159.8, 152.4, 148.5, 142.0, 123.6, 120.6, 118.2, 113.6, 83.9, 52.2, 48.2, 28.1, 19.9, 13.0; IR 3615, 2972, 1743, 1594, 1243, 1146, 770; HRMS (ESI) calculated for  $\text{C}_{17}\text{H}_{24}\text{N}_3\text{O}_4\text{S}$  [(M+H)<sup>+</sup>]: 366.1482 found 366.1473.

### Ethyl 2-(2-aminothiophen-3-yl)acetate (**16**)

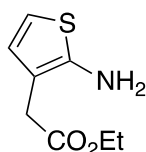

Ammonium nitrate (3.60 g, 45.0 mmol) and trifluoroacetic anhydride (2.5 mL, 18.0 mmol) were added to a solution of ethyl 3-thiophene acetate **30** (1.54 g, 9.00 mmol) in chloroform (30 mL). The mixture was stirred for 1 h while the temperature was maintained between 10 and 20 °C. Aqueous sodium bicarbonate solution was added and the mixture was extracted twice with dichloromethane. The organic extracts were dried (magnesium sulfate), concentrated *in vacuo* and re-dissolved in absolute ethanol (30 mL). Iron(0) powder (5.03 g, 90.0 mmol) and 3 N aqueous hydrochloric acid (2 mL) were added and the mixture was heated at reflux for 30 min. Aqueous sodium bicarbonate solution was added and the mixture was extracted with ethyl acetate three times. The combined organic layers were concentrated *in vacuo* and the residue was purified by column chromatography (1 : 4 diethyl ether : petroleum ether 30-40) to yield *the title compound 16* as a brown oil (549 mg, 2.97 mmol, 33 %);  $R_f = 0.21$  (1 : 4 diethyl ether : petroleum ether 30-40);  $\delta_H$  (600 MHz,  $CDCl_3$ ) 6.57 (1 H, d,  $J=5.7$ ), 6.40 (1 H, d,  $J=5.5$ ), 4.07 (2 H, q,  $J=7.2$ ), 3.83 (2 H, brs), 3.39 (2 H, s), 1.19 (3 H, t,  $J=7.2$ );  $\delta_C$  (151 MHz,  $CDCl_3$ ) 171.6, 146.7, 128.3, 114.7, 111.2, 60.9, 33.4, 14.1; IR 3340, 2981, 1723, 1459, 1184, 1029, 680; HRMS (ESI) calculated for  $C_8H_{12}NO_2S$  [(M+H)<sup>+</sup>]: 186.0583 found 186.0584.

### Ethyl 2-(2-(3-(2-((tert-butoxycarbonyl)(2-methoxy-2-oxoethyl)amino)-4-ethylbenzo[d]thiazol-5-yl)ureido)thiophen-3-yl)acetate (**29**)

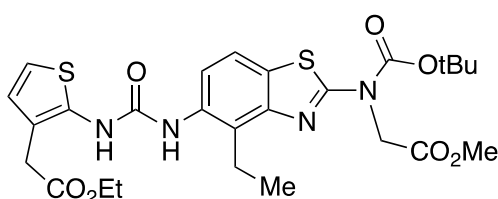

A solution of ethyl 2-(2-aminothiophen-3-yl)acetate **16** (633 mg, 3.42 mmol) in dichloromethane (10 mL) was added to a solution of phosgene (20 % in toluene, 3.88 mL, 7.36 mmol) at 0 °C. Triethylamine (1.53 mL, 10.9 mmol) was added, the mixture was stirred 0 °C for 30 min and then concentrated *in vacuo*. The residue was dissolved in dichloromethane (10 mL), then triethylamine (1.53 mL, 10.9 mmol) and aniline **11** (500 mg, 1.37 mmol) were added. After stirring for 1 h, the mixture was diluted with water and extracted with dichloromethane. The organic layer was concentrated *in vacuo* and the residue was purified by column chromatography (1:4 to 1:1 ethyl acetate: hexane) to yield *the title compound 29* as a pale brown amorphous solid (665 mg, 0.844 mmol, 62 % yield);

$\delta_{\text{H}}$  (400 MHz,  $\text{CDCl}_3$ ) 7.94 (1H, brs), 7.37 (1H, d,  $J=7.2$ ), 7.26 (1H, d,  $J=8.4$ ), 6.79 (1H, brs), 6.66 (1H, brs), 4.85 (2H, brs), 3.89 (2H, q,  $J=6.7$ ), 3.66 (3H, s), 3.39 (2H, brs), 2.69-2.92 (2H, m), 1.50 (9H, brs), 0.94-1.08 (6H, m);  $\delta_{\text{C}}$  (101 MHz,  $\text{CDCl}_3$ ) 171.3, 169.2, 159.8, 155.1, 152.3, 148.0, 136.5, 136.0, 132.2, 131.8, 131.0, 126.6, 122.1, 118.9, 118.1, 84.2, 61.1, 52.2, 48.1, 33.3, 28.0, 20.6, 14.0, 14.0; IR 3291, 2979, 2360, 1736, 1712, 1514, 1153, 1033; HRMS (ESI) calculated for  $\text{C}_{26}\text{H}_{33}\text{N}_4\text{O}_7\text{S}_2$  [(M+H)<sup>+</sup>]: 577.1785 found 577.1767.

**2-((*tert*-Butoxycarbonyl)(5-(3-(3-(carboxymethyl)thiophen-2-yl)ureido)-4-ethylbenzo[d]thiazol-2-yl)amino)acetic acid (21)**

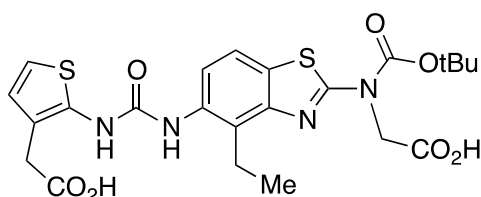

2 N aqueous NaOH (1.44 mL, 2.88 mmol) was added to a solution of diester **29** (330 mg, 0.572 mmol) in tetrahydrofuran (3 mL) and methanol (3 mL). The mixture stirred at room temperature for 1 h, then at 50 °C for 2 h. The mixture was acidified with 3 N aqueous HCl and extracted with ethyl acetate. The organic extract was washed with brine, dried (magnesium sulfate) and concentrated *in vacuo*. The resulting solid was washed with ethyl acetate and diethyl ether to yield *the title compound 21* as a brown solid (101 mg, 0.189 mmol, 33 % yield);  $\delta_{\text{H}}$  (400 MHz,  $\text{DMSO}-d_6$ ) 12.59 (2H, br s), 9.22 (1H, s), 8.34 (1H, s), 7.72 (1H, d,  $J$  7.7), 7.68 (1H, d,  $J$  7.7), 6.89 (1H, d,  $J$  5.5), 6.78 (1H, d,  $J$  5.5), 4.86 (2H, br s), 3.56 (2H, s), 2.95-3.07 (2H, m), 1.54 (9H, s), 1.14-1.23 (3H, m);  $\delta_{\text{C}}$  (101 MHz,  $\text{DMSO}-d_6$ ) 172.6, 170.2, 160.2, 153.0, 152.6, 147.9, 137.1, 134.3, 128.4, 127.8, 127.1, 120.4, 118.7, 116.9, 116.3, 84.2, 48.4, 33.2, 28.0, 20.4, 14.6; IR 2980, 2361, 1712, 1637, 1236, 1148, 632; HRMS (ESI) calculated for  $\text{C}_{23}\text{H}_{26}\text{N}_4\text{NaO}_7\text{S}_2$  [(M+Na)<sup>+</sup>]: 557.1135 found 557.1117.

**2-((*tert*-Butoxycarbonyl)(5-(3-(3-(carboxymethyl)thiophen-2-yl)ureido)-4-propylbenzo[d]thiazol-2-yl)amino)acetic acid (20)**

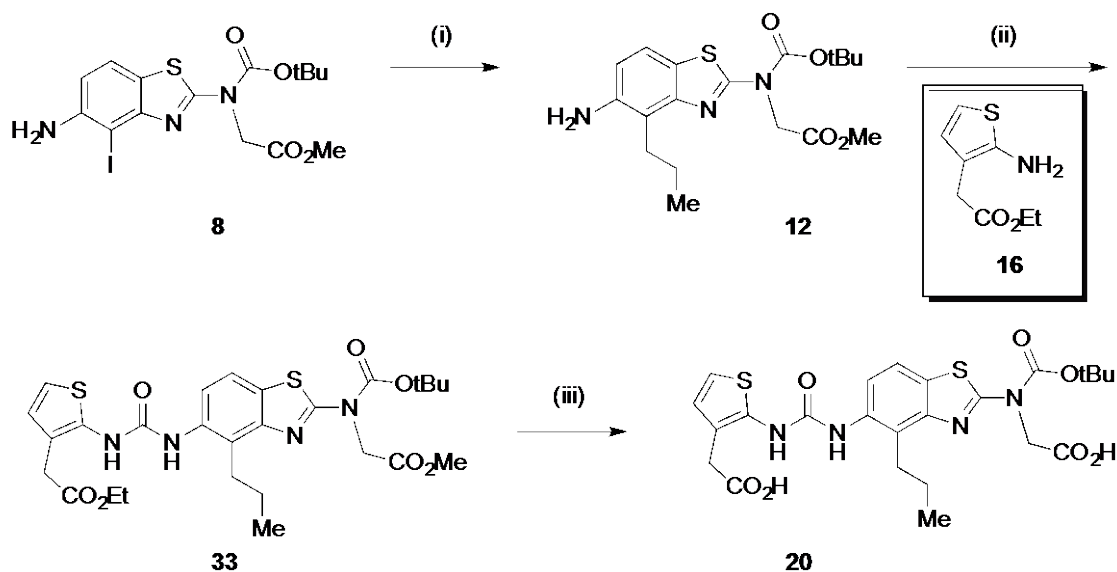

(i) *n*-propyl magnesium chloride, zinc chloride, PdCl<sub>2</sub>(dppf), THF, reflux; (ii) ethyl 2-(2-aminothiophen-3-yl)acetate **16**, phosgene, Et<sub>3</sub>N, CH<sub>2</sub>Cl<sub>2</sub>, 0 °C; (iii) aq. NaOH, THF-MeOH, 60 °C. Me = methyl, Et = ethyl, *t*-Bu = *tert*-butyl, dppf = 1,1'-bis(diphenylphosphino)ferrocene, DMF = *N,N*-dimethylformaldehyde, THF = tetrahydrofuran, NIS = *N*-iodosuccinimide.

**Methyl 2-((5-amino-4-propylbenzo[d]thiazol-2-yl)(*tert*-butoxycarbonyl)amino)acetate (12)**

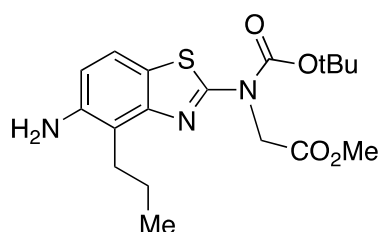

A solution of zinc(II) chloride (0.5 M in tetrahydrofuran, 35 mL, 17.5 mmol) was added to of a solution of *n*-propyl magnesium chloride (2 M in diethyl ether, 8.70 mL, 17.3 mmol) and stirred for 30 min at room temperature. Then iodide **8** (1.60 g, 3.46 mmol) in tetrahydrofuran (10 mL) and PdCl<sub>2</sub>(dppf) (253 mg, 40.346 mmol) were added and the mixture was stirred at 65 °C for 2 h. The mixture was diluted with water and extracted twice with ethyl acetate. The combined organic layers were concentrated *in vacuo* and the residue was purified by column chromatography (1:4 to 2:3 ethyl acetate: hexane) to yield *the title compound* **12** as a pale brown solid (404 mg, 1.06 mmol, 31 % yield);  $\delta_{\text{H}}$  (400 MHz, CDCl<sub>3</sub>) 7.29 (1H, d, *J* 8.2), 6.61 (1H, d, *J* 8.4), 4.87 (2H, s), 3.68 (3H, s), 3.60 (2H, br s), 2.82 (2H, t, *J* 7.6), 1.41-1.61 (11H, m), 0.89 (3H, t, *J* 7.4);  $\delta_{\text{C}}$  (101 MHz, CDCl<sub>3</sub>) 169.3, 159.6, 152.4, 149.0, 142.3, 123.5, 119.1, 118.2, 113.6, 83.9, 52.1, 48.2, 28.6, 28.1, 21.8, 14.2; IR 3383, 2958, 2361,

1746, 1714, 1514, 1236, 1145; HRMS (ESI) calculated for  $C_{18}H_{25}N_3NaO_4S$   $[(M+Na)^+]$ : 402.1458 found 402.1446.

**Ethyl 2-(2-(3-(2-((*tert*-butoxycarbonyl)(2-methoxy-2-oxoethyl)amino)-4-propylbenzo[d]thiazol-5-yl)ureido)thiophen-3-yl)acetate (**33**)**

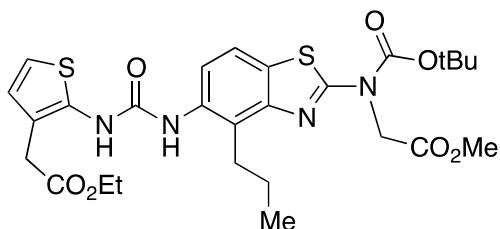

A solution of ethyl 2-(2-aminothiophen-3-yl)acetate **16** (650 mg, 3.51 mmol) in dichloromethane (10 mL) was added a solution of phosgene (20 % in toluene, 2.88 mL, 5.62 mmol) at 0 °C. Triethylamine (1.57 mL, 11.3 mmol) was added and the mixture was stirred at 0 °C for 30 min. The solvent was removed *in vacuo* and the residue was re-dissolved in dichloromethane (10 mL). Triethylamine (1.57 mL, 11.3 mmol) and aniline **12** (476 mg, 1.25 mmol) were added and the mixture was stirred for 1 h, then diluted with water and extracted with dichloromethane. The organic extract was concentrated *in vacuo* and the residue purified by column chromatography (1:4 to 1:1 ethyl acetate : hexane) to yield *the title compound* **33** as a pale brown amorphous solid (576 mg, 0.975 mmol, 78 % yield);  $\delta_H$  (400 MHz,  $CDCl_3$ ) 7.52 (1H, d,  $J$  8.4), 7.41 (1H, d,  $J$  8.1), 6.65-6.78 (1H, m), 6.51 (1H, br s), 4.86 (2H, s), 3.89 (2H, q,  $J$  7.0), 3.68 (3H, s), 3.44 (2H, s), 2.77-2.89 (2H, m), 1.38-1.67 (11H, m), 1.04 (3H, t,  $J$  7.1), 0.81 (3H, t,  $J$  7.3);  $\delta_C$  (101 MHz,  $CDCl_3$ ) 171.4, 171.2, 169.1, 159.8, 155.1, 153.6, 148.4, 136.4, 136.0, 132.5, 126.8, 126.7, 121.9, 119.1, 118.3, 84.1, 61.1, 52.1, 48.1, 33.3, 29.2, 28.0, 22.9, 14.1, 14.0; IR 3306, 2958, 1718, 1509, 1242, 1146, 1030; HRMS (ESI) calculated for  $C_{27}H_{35}N_4O_7S_2$   $[(M+H)^+]$ : 591.1941 found 591.1925.

**2-((*tert*-Butoxycarbonyl)(5-(3-(3-(carboxymethyl)thiophen-2-yl)ureido)-4-propylbenzo[d]thiazol-2-yl)amino)acetic acid (**20**)**

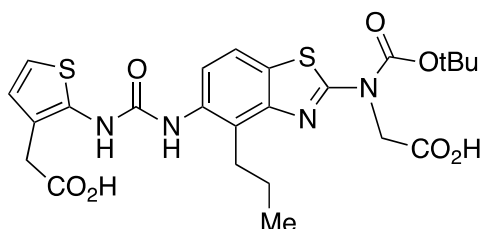

2 N aqueous NaOH (0.78 mL, 1.56 mmol) was added to a solution of diester **33** (368 mg, 0.623 mmol) in tetrahydrofuran (3 mL) and methanol (3 mL). The mixture was stirred at 60 °C for 1 h, then acidified with 3 N aqueous HCl and extracted with ethyl acetate. The organic extract was washed with brine, dried (magnesium sulfate) and concentrated *in vacuo* to give

a crude solid. The solid was washed with ethyl acetate and diethyl ether to yield *the title compound 20* as a pale brown solid (202 mg, 0.368 mmol, 59 % yield);  $\delta_{\text{H}}$  (400 MHz, DMSO- $d_6$ ) 9.21 (1H, s), 8.30 (1H, s), 7.60-7.80 (2H, m), 6.87-6.94 (1H, m), 6.73-6.83 (1H, m), 3.56 (2H, s), 2.99 (2H, t,  $J$  7.6), 1.47-1.71 (11H, m), 0.90 (3H, t,  $J$  7.3);  $\delta_{\text{C}}$  (101 MHz, DMSO- $d_6$ ) 172.6, 172.4, 170.1, 160.0, 153.1, 148.4, 137.1, 134.6, 128.4, 127.1, 126.5, 120.7, 118.7, 117.0, 116.4, 84.3, 48.4, 33.2, 28.5, 28.0, 22.8; IR 3245, 2962, 2358, 1711, 1638, 1511, 1235, 1150, 633; HRMS (ESI) calculated for  $\text{C}_{24}\text{H}_{28}\text{N}_4\text{NaO}_7\text{S}_2$  [(M+Na) $^+$ ]: 571.1291 found 571.1275.

### 3-(2-(3-(2-((2-Carboxyethyl)(ethoxycarbonyl)amino)-4-propylbenzo[d]thiazol-5-yl)ureido)thiophen-3-yl)propanoic acid (22)

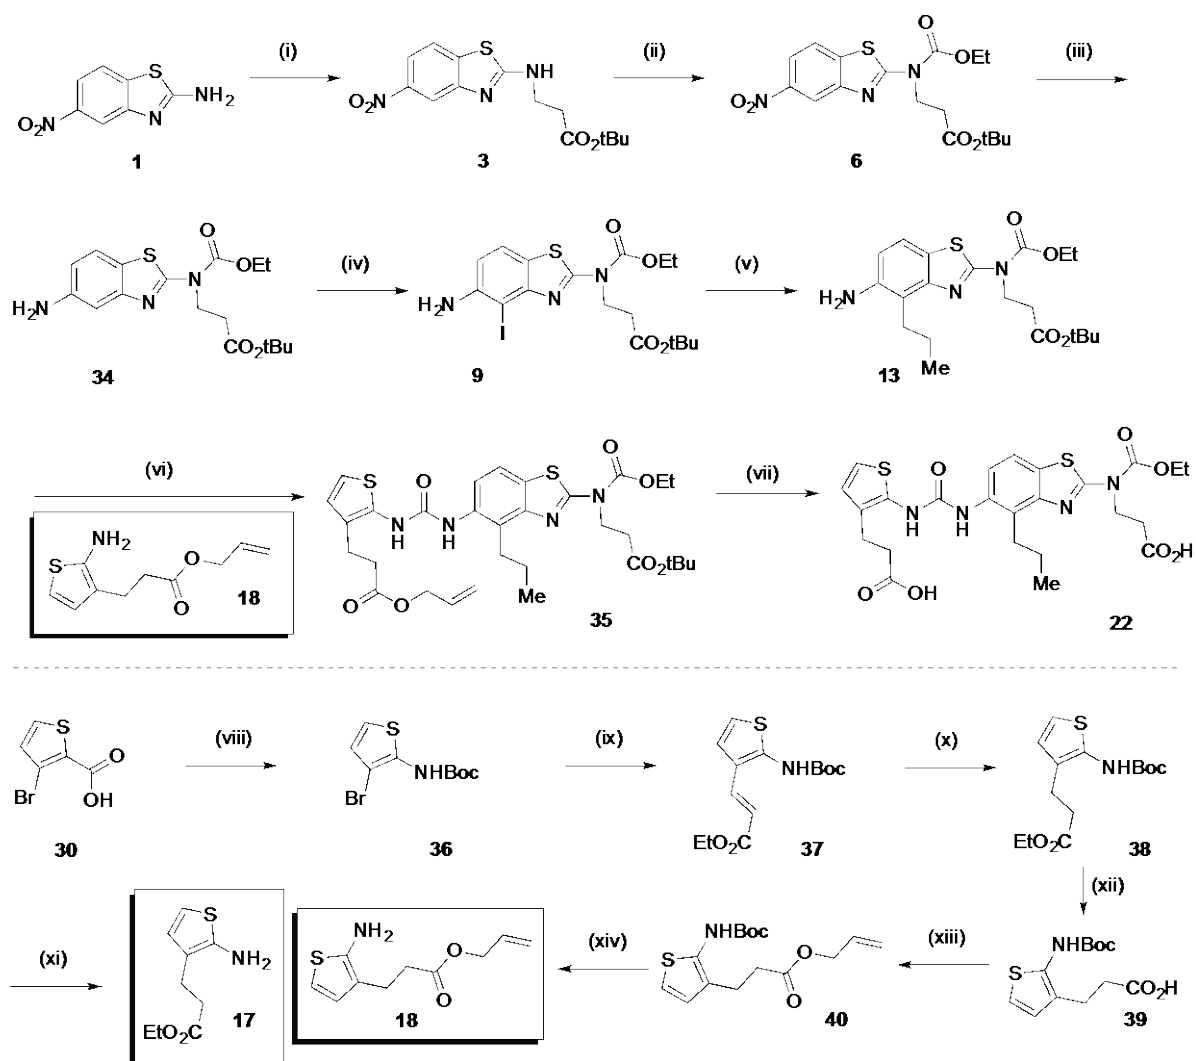

(i) (1)  $i\text{-BuONO}$ ,  $\text{CuCl}_2 \cdot \text{H}_2\text{O}$ , MeCN, r.t. to 60 °C; (2)  $\text{H}_2\text{NCH}_2\text{CH}_2\text{CO}_2t\text{-Bu}$ ,  $i\text{-Pr}_2\text{NEt}$ , DMF, r.t.; (ii) diethylpyrocarbonate, DMAP, MeCN; (iii)  $\text{H}_2$ , Pd/C, THF-MeOH, r.t.; (iv) NIS, MeCN, 0 °C; (v)  $n\text{-Pr}$  magnesium chloride, zinc chloride,  $\text{PdCl}_2(\text{dppf})$ , THF, reflux; (vi) allyl 3-(2-aminothiophen-3-yl)propanoate 18, phosgene,  $\text{Et}_3\text{N}$ ,  $\text{CH}_2\text{Cl}_2$ , 0 °C (vii) (1) piperidine,  $\text{Pd}(\text{PPh}_3)_4$ , THF, r.t.; (2) TFA,  $\text{CH}_2\text{Cl}_2$  (viii) DPPA,  $\text{Et}_3\text{N}$ ,  $t\text{-BuOH}$ , 90 °C, 16 h; (ix) ethyl acrylate,  $\text{PdCl}_2(\text{dppf})$ ,  $\text{Et}_3\text{N}$ , DMF, 100 °C, 10 h; (x) nickel(II) chloride, NaBH<sub>4</sub>, MeOH, 0 °C - r.t., 1 h; (xi) TFA,  $\text{CH}_2\text{Cl}_2$ , 0 °C, 30 mins; (xii) aq. NaOH, THF-MeOH, r.t., 30 mins; (xiii) allyl bromide, potassium carbonate, DMF, r.t., 30 mins; (xiv) TFA,  $\text{CH}_2\text{Cl}_2$ , r.t., 30 mins.  $i$  = iso,  $t\text{-Bu}$  = *tert*-butyl, Me = methyl, r.t. = room temperature, Pr = propyl, Et = ethyl, DMAP = 4-dimethylaminopyridine, DMF = *N,N*-dimethylformaldehyde, THF = tetrahydrofuran, NIS = *N*-iodosuccinimide, dppf = 1,1'-bis(diphenylphosphino)ferrocene, TFA = trifluoroacetic acid.

***tert*-Butyl 3-((5-nitrobenzo[d]thiazol-2-yl)amino)propanoate (3)**

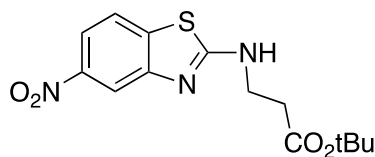

Isobutyl nitrile (6.20 mL, 46.2 mmol) was added to a mixture of  $\text{CuCl}_2 \cdot 2\text{H}_2\text{O}$  (6.30 g, 36.9 mmol) in acetonitrile (80 mL) and stirred for 10 min at room temperature. Then 5-nitrobenzo[d]thiazol-2-amine **1** (6.00 g, 30.8 mmol) was added and the mixture was stirred at room temperature for 30 min, and at 60 °C for 1 h. The mixture was diluted with 3 *N* aqueous HCl and filtered. The filtrate was extracted with ethyl acetate and organic layer was dried (magnesium sulfate) and concentrated *in vacuo*. The crude product was passed through a pad of silica gel (ethyl acetate), concentrated *in vacuo* and re-dissolved in *N,N'*-dimethylformamide (80 mL). *tert*-Butyl 3-aminopropanoate (6.74 g, 46.4 mmol) and diisopropylethylamine (10.7 mL, 61.6 mmol) were added to the solution. After stirring at room temperature for 16 h, the mixture was diluted with ethyl acetate and washed with brine three times. The solvent was removed *in vacuo* and the residue was purified by column chromatography (1:4 to 2:3 ethyl acetate : hexane) to yield *the title compound 3* as a yellow solid (5.11 g, 15.8 mmol, 51 % yield);  $\delta_{\text{H}}$  (400 MHz,  $\text{CDCl}_3$ ) 8.38 (1H, d, *J* 2.3), 8.00 (1H, dd, *J* 8.6, 2.2), 7.69 (1H, d, *J* 8.5), 6.03 (1H, br s), 3.80 (2H, q, *J* 5.8), 2.65-2.72 (2H, m), 1.50 (9H, s);  $\delta_{\text{C}}$  (101 MHz,  $\text{CDCl}_3$ ) 171.7, 168.4, 152.9, 146.8, 138.0, 120.6, 116.4, 113.7, 81.6, 40.7, 34.6, 28.1; IR 3359, 2971, 1711, 1623, 1515, 1130, 950, 755; HRMS (ESI) calculated for  $\text{C}_{14}\text{H}_{16}\text{N}_3\text{O}_4\text{S}$  [(M-H)<sup>+</sup>]: 322.0856 found 322.0860.

***tert*-Butyl 3-((ethoxycarbonyl)(5-nitrobenzo[d]thiazol-2-yl)amino)propanoate (6)**

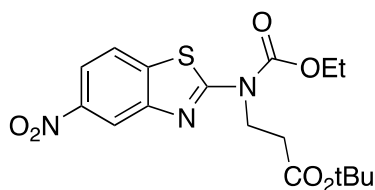

Diethylpyrocabonate (3.33 mL, 22.6 mmol) and 4-(dimethylamino)pyridine (92.2 mg, 0.755 mmol) were added to a solution of amine **3** (4.87 g, 15.1 mmol) in tetrahydrofuran (30 mL). After stirring for 1 h at room temperature, the mixture was diluted with ethyl acetate and washed with brine. The organic layer was through a pad of silica gel (ethyl acetate) and the solvent was removed *in vacuo*. The residue was washed with diethyl ether and hexane to yield *the title compound 6* as a white solid (5.50 g, 13.9 mmol, 92 % yield);  $\delta_{\text{H}}$  (400 MHz,  $\text{CDCl}_3$ ) 8.58 (1H, d, *J* 2.1), 8.09 (1H, dd, *J* 8.7, 2.3), 7.82 (1H, d, *J* 8.7), 4.42-4.49 (2H, m), 4.37 (2H, q, *J* 7.2), 2.63-2.73 (2H, m), 1.33-1.41 (12H, m);  $\delta_{\text{C}}$  (101 MHz,  $\text{CDCl}_3$ ) 170.2, 162.8, 154.1, 149.2, 146.6, 140.3, 121.2, 118.1, 116.5, 81.1, 64.1, 43.4, 33.7, 28.0, 14.4; IR 1705, 1511,

1285, 1161, 837, 742; HRMS (ESI) calculated for  $C_{17}H_{22}N_3O_6S$   $[(M+H)^+]$ : 396.1223 found 396.1211.

***tert*-Butyl 3-((5-aminobenzo[d]thiazol-2-yl)(ethoxycarbonyl)amino)propanoate (34)**

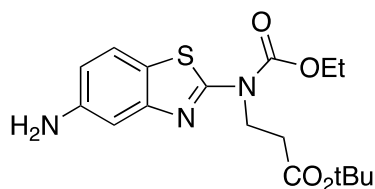

Nitro compound **6** (5.30 g, 13.4 mmol) and palladium on carbon (10 % w/w, 2.00 g, 1.89 mmol Pd) were combined in tetrahydrofuran (50 mL). The mixture was stirred under hydrogen atmosphere (balloon pressure) for 1.5 h. Filtration and concentration *in vacuo* afforded a crude solid, which was collected and washed with diethyl ether to give *the title compound 34* as a white solid (4.18 g, 11.4 mmol, 85 % yield);  $\delta_H$  (400 MHz,  $CDCl_3$ ) 7.54 (1H, d, *J* 8.4), 7.15 (1H, d, *J* 2.1), 6.72 (1H, dd, *J* 8.4, 2.1), 4.48-4.54 (2H, m), 4.42 (2H, q, *J* 7.1), 3.78 (2H, br s), 2.71-2.80 (2H, m), 1.47 (9H, s), 1.44 (3H, t, *J* 7.2);  $\delta_C$  (101 MHz,  $CDCl_3$ ) 170.6, 161.0, 154.0, 150.5, 145.1, 123.4, 121.2, 113.1, 106.8, 80.8, 63.4, 43.0, 33.9, 28.0, 14.4; IR 1707, 1504, 1475, 1201, 1152, 764; HRMS (ESI) calculated for  $C_{17}H_{24}N_3O_4S$   $[(M+H)^+]$ : 366.1482 found 366.1471.

***tert*-Butyl 3-((5-amino-4-iodobenzo[d]thiazol-2-yl)(ethoxycarbonyl)amino)propanoate (9)**

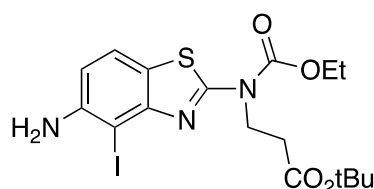

*N*-Iodosuccinimide (2.39 g, 10.6 mmol) was added to a solution of aniline **34** (3.88 g, 10.6 mmol) in acetonitrile (25 mL) and stirred for 30 min at room temperature. Aqueous sodium thiosulfate was added and the mixture was extracted with ethyl acetate. The solvent was removed *in vacuo* and the residue was purified by column chromatography (1:9 to 3:7 ethyl acetate : hexane) to yield *the title compound 9* as a brown oil (4.84 g, 9.85 mmol, 93 % yield);  $\delta_H$  (400 MHz,  $CDCl_3$ ) 7.48 (1H, d, *J* 8.4), 6.71 (1H, d, *J* 8.4), 4.51-4.62 (2H, m), 4.42 (2H, q, *J* 7.1), 4.27 (2H, br s), 2.78-2.86 (2H, m), 1.47 (9H, s), 1.44 (3H, t, *J* 7.2);  $\delta_C$  (101 MHz,  $CDCl_3$ ) 170.6, 160.3, 153.9, 151.1, 146.0, 121.2, 120.9, 112.0, 80.8, 77.3, 63.6, 43.3, 33.8, 28.1, 14.4; IR 3365, 2977, 1709, 1504, 1404, 1193, 1146, 845; HRMS (ESI) calculated for  $C_{17}H_{22}IN_3NaO_4S$   $[(M+Na)^+]$ : 514.0267 found 514.0252.



***tert*-Butyl 3-((5-amino-4-propylbenzo[d]thiazol-2-yl)(ethoxycarbonyl)amino)propanoate (13)**

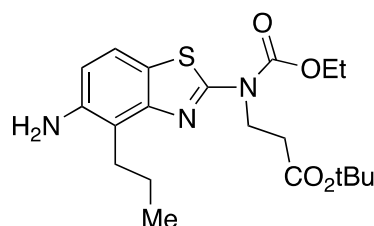

A solution of zinc(II) chloride (0.5 M in tetrahydrofuran, 39 mL, 19.6 mmol) was added to a solution of *n*-propyl magnesium chloride (2 M in diethyl ether, 9.80 mL, 19.6 mmol) and stirred for 30 min at room temperature. Then iodide **9** (1.93 g, 3.93 mmol) in tetrahydrofuran (10 mL) and PdCl<sub>2</sub>(dppf) (288 mg, 0.393 mmol) were added and the mixture was stirred at 65 °C for 2.5 h. The mixture was diluted with water and extracted twice with ethyl acetate. The combined organic layers were concentrated *in vacuo* and the residue was purified by column chromatography (3:17 to 3:7 ethyl acetate : hexane) to yield *the title compound 13* as a brown oil (558 mg, 1.37 mmol, 35 % yield);  $\delta_{\text{H}}$  (400 MHz, CDCl<sub>3</sub>) 7.32 (1H, d, *J* 8.4), 6.63 (1H, d, *J* 8.4), 4.46, (2H, m), 4.42 (2H, dd, *J* 8.5, 7.0), 3.62 (2H, br s), 2.84-2.92 (2H, m), 2.59-2.70 (2H, m), 1.56-1.68 (2H, m), 1.38 (9H, s), 1.33 (3H, t, *J* 7.1), 0.93 (3H, t, *J* 7.3);  $\delta_{\text{C}}$  (101 MHz, CDCl<sub>3</sub>) 170.7, 159.4, 153.9, 149.4, 142.3, 123.3, 119.2, 118.3, 113.6, 80.7, 63.3, 43.2, 33.8, 28.6, 28.0, 22.0, 14.4, 14.4; IR 2977, 1711, 1510, 1408, 1193, 1145, 1029, 764; HRMS (ESI) calculated for C<sub>20</sub>H<sub>30</sub>N<sub>3</sub>O<sub>4</sub>S [(M+H)<sup>+</sup>]: 408.1940 found 408.1951.

***tert*-Butyl (3-bromothiophen-2-yl)carbamate (36)**

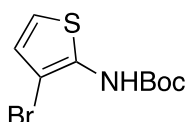

A solution of 3-bromothiophene-2-carboxylic acid **30** (5.00 g, 24.2 mmol), diphenylphosphoryl azide (6.3 mL, 29 mmol) and triethylamine (4.0 mL, 29 mmol) in *tert*-butanol (50 mL) was heated at 90 °C for 16 h. The mixture was concentrated *in vacuo* and the residue was purified by column chromatography (5 : 95 ethyl acetate : petroleum ether 30-40) to yield *the title compound 36* as a yellow oil (4.55 g, 68 %).  $\delta_{\text{H}}$  (500 MHz, CDCl<sub>3</sub>) 7.08 (1 H, br), 6.86 (1 H, d, *J* 5.8), 6.80 (1 H, d, *J* 5.8), 1.55 (9 H, s);  $\delta_{\text{C}}$  (126 MHz, CDCl<sub>3</sub>) 151.9, 134.9, 126.3, 116.5, 93.3, 82.1, 28.2; IR 3391, 2978, 1720, 1564, 1478, 1152; HRMS (ESI) calculated for C<sub>9</sub>H<sub>12</sub>NO<sub>2</sub><sup>79</sup>BrNa [(M+Na)<sup>+</sup>]: 299.9664 found 299.9665.

### Ethyl (*E*)-3-(2-((*tert*-butoxycarbonyl)amino)thiophen-3-yl)acrylate (**37**)

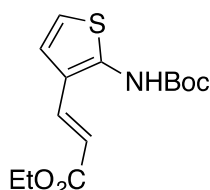

Ethyl acrylate (1.8 mL, 17 mmol), PdCl<sub>2</sub>(dppf) (241 mg, 0.33 mmol) and triethylamine (1.4 mL, 10 mmol) were added to solution of bromide **9** (918 mg, 3.30 mmol) in *N,N'*-dimethylformamide (10 mL). The mixture was heated at 110 °C for 16 h, then diluted with ethyl acetate and brine. The organic layer was isolated, washed three times with brine and concentrated *in vacuo*. The residue was purified by column chromatography (1:9 to 2:8 ethyl acetate:hexane) to yield *the title compound* **37** as a dark orange oil (304 mg, 31 % yield); δ<sub>H</sub> (500 MHz, CDCl<sub>3</sub>) 7.61 (1 H, d, *J* 15.6), 7.36 (1 H, br), 7.02 (1 H, d, *J* 5.8), 6.85 (1 H, d, *J* 5.8), 6.18 (1 H, d, *J* 15.6), 4.26 (2 H, q, *J* 7.2), 1.54 (9 H, s), 1.33 (3 H, t, *J* 7.1); δ<sub>C</sub> (126 MHz, CDCl<sub>3</sub>) 167.6, 152.0, 141.8, 133.9, 129.1, 122.3, 118.1, 115.9, 82.3, 60.5, 28.2, 14.3; IR 3291, 2979, 1689, 1554, 1242, 1154; HRMS (ESI) calculated for C<sub>14</sub>H<sub>18</sub>NO<sub>4</sub>S [(M-H<sup>+</sup>)]: 296.0951 found 296.0963.

### Ethyl 3-(2-((*tert*-butoxycarbonyl)amino)thiophen-3-yl)propanoate (**38**)

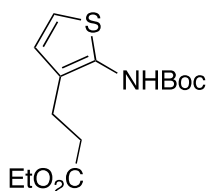

Nickel(II) chloride (18 mg, 14 mmol) and sodium borohydride (28 mg, 0.74 mmol) were added to a solution of alkene **37** (431 mg, 1.45 mmol) in methanol (10 mL) at 0 °C. The mixture was stirred at 0 °C for 30 min and then warmed to room temperature and stirred for 1.5 h, at which point the <sup>1</sup>H NMR spectrum of an aliquot of reaction mixture confirmed complete consumption of the starting material. Aqueous ammonium chloride was added and the mixture was extracted twice with dichloromethane. The organic extracts were concentrated *in vacuo* and the residue was purified by column chromatography (15:85 diethyl ether:petroleum ether 30-40) to yield *the title compound* **38** as a colorless oil (228 mg, 53 % yield); δ<sub>H</sub> (400 MHz, CDCl<sub>3</sub>) 7.71 (1 H, br), 6.83 (1 H, d, *J* 5.6), 6.65 (1 H, d, *J* 5.4), 4.11 (2 H, q, *J* 7.1), 2.77 (2 H, t, *J* 6.4), 2.58 (2 H, t, *J* 6.9), 1.52 (9 H, s), 1.22 (3 H, t, *J* 7.2); δ<sub>C</sub> (101 MHz, CDCl<sub>3</sub>) 174.0, 153.2, 135.1, 125.8, 125.0, 117.6, 80.8, 60.8, 34.5, 28.2, 22.0, 14.0; IR 3325, 2979, 2360, 1716, 1578, 1497, 1247, 1161; HRMS (ESI) calculated for C<sub>14</sub>H<sub>21</sub>NNaO<sub>4</sub>S [(M+Na)<sup>+</sup>]: 322.1084 found 322.1081.

### Ethyl 3-(2-aminothiophen-3-yl)propanoate (**17**)

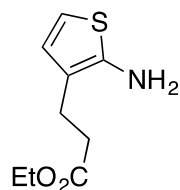

Trifluoroacetic acid (2 mL) was added to a solution of carbamate **38** (228 mg, 0.763 mmol) in dichloromethane (2 mL) and the mixture was stirred at room temperature for 30 min. Aqueous sodium bicarbonate solution was added and the mixture was extracted twice with dichloromethane. The organic extracts were dried (magnesium sulfate) and concentrated *in vacuo* to yield *the title compound 17* as a colorless oil (149 mg, 98 % yield);  $\delta_{\text{H}}$  (400 MHz,  $\text{CDCl}_3$ ) 6.59 (1 H, d,  $J$  5.6), 6.47 (1 H, d,  $J$  5.6), 4.11 (2 H, q,  $J$  7.1), 3.64 (2 H, br), 2.73 - 2.76 (2 H, m), 2.54 - 2.59 (2 H, m), 1.22 (3 H, t,  $J$  7.1);  $\delta_{\text{C}}$  (101 MHz,  $\text{CDCl}_3$ ) 173.7, 144.9, 127.6, 121.3, 111.4, 60.5, 34.6, 21.8, 14.1; IR 3335, 2928, 1724, 1456, 1189; HRMS (ESI) calculated for  $\text{C}_9\text{H}_{14}\text{NO}_2\text{S}$  [(M+H)<sup>+</sup>]: 200.0740 found 200.0741.

### 3-(2-((*tert*-Butoxycarbonyl)amino)thiophen-3-yl)propanoic acid (**39**)

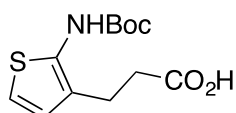

2 *N* Aqueous NaOH (3.4 mL, 6.8 mmol) was added to a solution of **38** (1.34 g, 4.48 mmol) in tetrahydrofuran (10 mL) and methanol (10 mL). The mixture was stirred for 30 min at room temperature. The reaction mixture was acidified to pH 2 by addition of 1 *N* aqueous HCl and extracted three times with ethyl acetate. The organic extracts were washed with brine, dried (magnesium sulfate) and concentrated *in vacuo* to yield *the title compound 39* (1.19 g, 98 % yield);  $\delta_{\text{H}}$  (600 MHz,  $\text{CDCl}_3$ ) 7.51 (1 H, br), 6.84 (1 H, d,  $J$  5.5), 6.68 (1 H, d,  $J$  5.3), 2.79 (2 H, br), 2.66 (2 H, br), 1.51 (9 H, s);  $\delta_{\text{C}}$  (151 MHz,  $\text{CDCl}_3$ ) 179.3, 153.1, 135.0, 125.9, 124.7, 117.8, 81.1, 34.1, 28.2, 21.7; IR 3296, 2979, 1704, 1250, 1159; HRMS (ESI) calculated for  $\text{C}_{12}\text{H}_{16}\text{NO}_4\text{S}$  [(M-H)<sup>-</sup>]: 270.0806 found 270.0805.

### Allyl 3-(2-((tert-butoxycarbonyl)amino)thiophen-3-yl)propanoate (**40**)

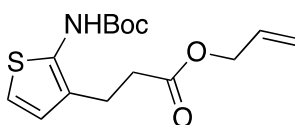

Allyl bromide (0.46 mL, 5.3 mmol) and potassium carbonate (909 mg, 6.59 mmol) were added to a solution of acid **39** (1.19 g, 4.39 mmol) in *N,N'*-dimethylformamide (15 mL). The mixture was stirred at room temperature for 30 min, then diluted with brine and extracted with ethyl acetate. The organic extract was washed four times with brine, dried (magnesium sulfate) and concentrated *in vacuo* to yield *the title compound* **40** (1.30 g, 95 % yield);  $\delta_{\text{H}}$  (600 MHz,  $\text{CDCl}_3$ ) 7.59 (1 H, br), 6.85 (1 H, d, *J* 5.5), 6.67 (1 H, d, *J* 5.5), 5.80 - 5.93 (1 H, m), 5.20 - 5.32 (2 H, m), 4.57 (2 H, d, *J* 5.9), 2.79 (2 H, t, *J* 6.8), 2.64 (2 H, t, *J* 6.6), 1.53 (9 H, s);  $\delta_{\text{C}}$  (151 MHz,  $\text{CDCl}_3$ ) 173.6, 153.2, 135.2, 131.8, 125.8, 125.0, 118.5, 117.8, 80.9, 65.5, 34.5, 28.3, 22.0; IR 3328, 2979, 1717, 1578, 1496, 1368, 1246, 1160; HRMS (ESI) calculated for  $\text{C}_{15}\text{H}_{20}\text{NO}_4\text{S}$  [(M-H)<sup>-</sup>]: 310.1119 found 310.1120.

### Allyl 3-(2-aminothiophen-3-yl)propanoate (**18**)

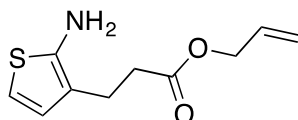

Trifluoroacetic acid (0.1 mL) was added to a solution of carbamate **40** (15 mg, 0.048 mmol) in dichloromethane (1 mL). The mixture was stirred at room temperature for 2 h. Aqueous sodium bicarbonate solution was added and the mixture was extracted three times with ethyl acetate, dried (magnesium sulfate), and concentrated *in vacuo* to yield *the title compound* **18** (10 mg, 98 % yield);  $\delta_{\text{H}}$  (600 MHz,  $\text{CDCl}_3$ ) 6.62 (1 H, d, *J* 5.5), 6.50 (1 H, d, *J* 5.5), 5.85 - 5.96 (1 H, m), 5.22 - 5.32 (2 H, m), 4.59 (2 H, d, *J* 5.7), 3.79 (2 H, br), 2.79 (2 H, t, *J* 7.2), 2.64 (2 H, t, *J* 7.1); HRMS (ESI) calculated for  $\text{C}_{10}\text{H}_{14}\text{NO}_2\text{S}$  [(M+H)<sup>+</sup>]: 212.0740 found 212.0740.

**Allyl 3-(2-(3-(2-((3-(*tert*-butoxy)-3-oxopropyl)(ethoxycarbonyl)amino)-4-propylbenzo[d]thiazol-5-yl)ureido)thiophen-3-yl)propanoate (35)**

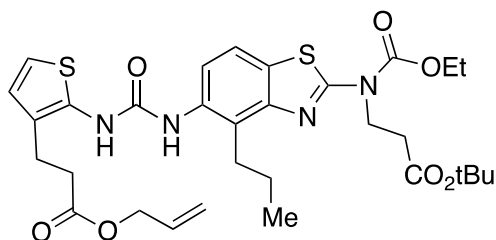

A solution of allyl 3-(2-aminothiophen-3-yl)propanoate **18** (542 mg, 2.57 mmol) in dichloromethane (5 mL) was added to a solution of phosgene (20 % in toluene, 2.07 mL, 4.11 mmol) at 0 °C. Triethylamine (1.15 mL, 8.22 mmol) was added and the mixture was stirred at 0 °C for 30 min. The solvent was removed *in vacuo* and the residue was re-dissolved in dichloromethane (5 mL). Triethylamine (1.15 mL, 8.22 mmol) and aniline **13** (427 mg, 1.05 mmol) were added and the mixture was stirred for 1 h, then diluted with water and extracted with dichloromethane. The organic extract was concentrated *in vacuo* and dissolved in *tert*-butanol (5 mL). Potassium carbonate (2.60 g, 11.6 mmol) was added and the mixture was stirred at 60 °C for 1h, then diluted with water and extracted with ethyl acetate. The organic extract was concentrated *in vacuo* and purified by column chromatography (3:17 to 2:3 ethyl acetate : hexane) to yield *the title compound 35* as a pale yellow solid (114 mg, 0.177 mmol, 17 % yield);  $\delta_{\text{H}}$  (400 MHz,  $\text{CDCl}_3$ ) 7.60-7.69 (2H, m), 7.00-7.08 (1H, m), 6.79 (1H, d,  $J$  5.3), 6.57 (1H, br), 5.73-5.89 (1H, m), 5.18-5.29 (2H, m), 4.36-4.65 (4H, m), 3.01 (2H, d,  $J$  7.3), 2.83 (2H, t,  $J$  6.4), 2.73-2.79 (2H, m), 2.60-2.67 (2H, m), 1.57-1.69 (2H, m), 1.41-1.51 (12H, m), 0.95 (3H, t,  $J$  7.3);  $\delta_{\text{C}}$  (101 MHz,  $\text{CDCl}_3$ ) 173.3, 170.5, 159.6, 154.8, 153.9, 148.8, 134.8, 132.7, 131.1, 130.5, 129.6, 126.2, 121.6, 118.4, 118.4, 118.4, 118.4, 80.8, 65.4, 63.5, 43.2, 34.2, 33.7, 29.3, 28.0, 23.0, 22.2, 14.4, 14.2; IR 1734, 1631, 1442, 1195, 766; HRMS (ESI) calculated for  $\text{C}_{31}\text{H}_{41}\text{N}_4\text{O}_7\text{S}_2$   $[(\text{M}+\text{H})^+]$ : 645.2411 found 645.2383.

**3-(2-(3-(2-((2-Carboxyethyl)(ethoxycarbonyl)amino)-4-propylbenzo[d]thiazol-5-yl)ureido)thiophen-3-yl)propanoic acid (22)**

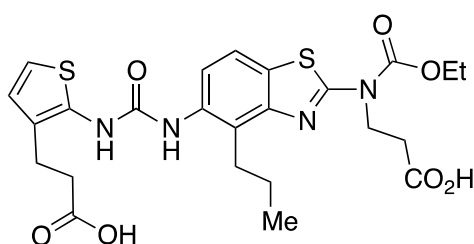

Piperidine (0.062 mL, 0.630 mmol) and tetrakis(triphenylphosphine)palladium(0) (14.6 mg, 0.0126 mmol) were added to a solution of diester **35** (81.3 mg, 0.126 mmol) in

tetrahydrofuran (5 mL). The mixture was stirred at room temperature for 30 min, then diluted with 3 N aqueous HCl and extracted with ethyl acetate. The organic extract was washed with brine, dried (magnesium sulfate) and concentrated *in vacuo*. The residue was dissolved in dichloromethane (2 mL) and treated with trifluoroacetic acid (2 mL). After stirring for 4 h at room temperature, the mixture was concentrated *in vacuo*. Diethyl ether was added, causing the crude product to solidify. This was collected and washed with ethyl acetate to yield *the title compound 22* as a brown solid (30.5 mg, 0.0556 mmol, 44 % yield);  $\delta_{\text{H}}$  (400 MHz, DMSO- $d_6$ ) 12.33 (2H, br s), 9.12 (1H, s), 8.33 (1H, s), 7.70-7.77 (1H, m), 7.61-7.67 (1H, m), 6.89 (1H, d,  $J$  5.5), 6.78 (1H, d,  $J$  5.5), 4.42 (2H, t,  $J$  7.3), 4.34 (2H, q,  $J$  7.2), 3.03 (2H, t,  $J$  7.3), 2.68-2.83 (4H, m), 2.57 (2H, t,  $J$  7.3), 1.58-1.70 (2H, m), 0.94 (3H, t,  $J$  7.3);  $\delta_{\text{C}}$  (101 MHz, DMSO- $d_6$ ) 174.4, 172.8, 159.8, 153.9, 153.2, 148.7, 135.3, 134.6, 128.2, 126.6, 126.0, 123.1, 120.7, 118.6, 116.7, 63.8, 34.2, 32.6, 28.9, 28.0, 23.0, 22.7, 14.5, 14.4; IR 2981, 2359, 1712, 1632, 1231, 639; HRMS (ESI) calculated for  $\text{C}_{24}\text{H}_{29}\text{N}_4\text{O}_7\text{S}_2$  [(M+H) $^+$ ]: 549.1472 found 549.1460.

### 3-(2-(3-(2-((*tert*-Butoxycarbonyl)(2-carboxyethyl)amino)-4-propylbenzo[d]thiazol-5-yl)ureido)thiophen-3-yl)propanoic acid (19)

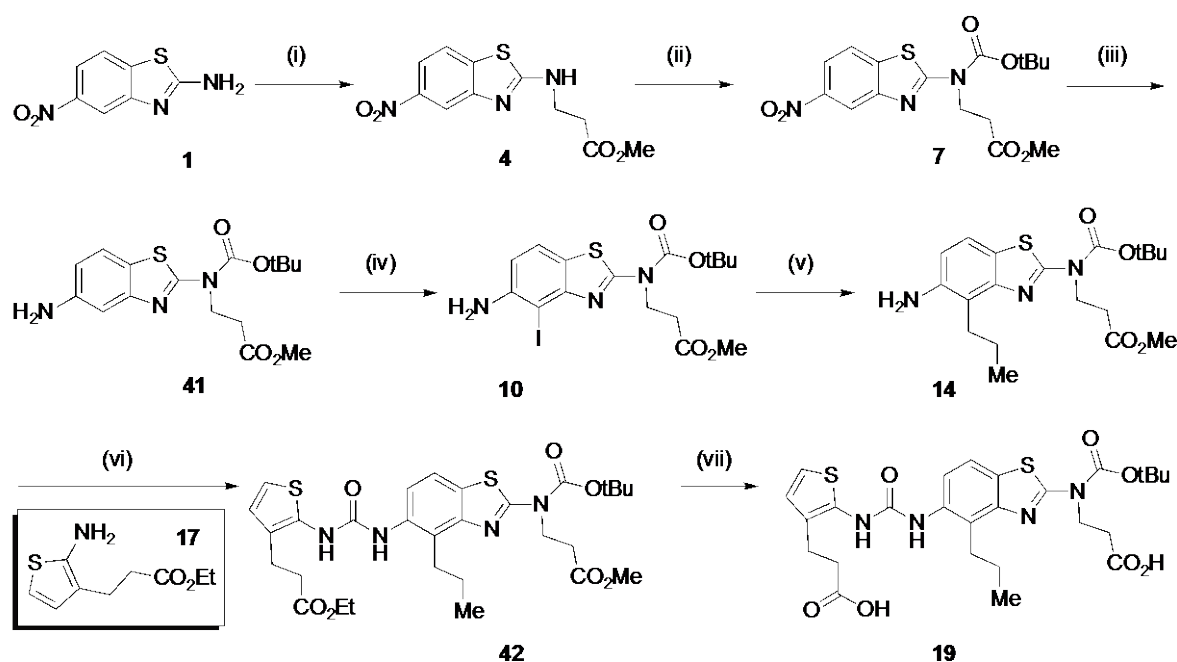

(i) (1) *t*-BuONO,  $\text{CuCl}_2 \cdot \text{H}_2\text{O}$ ; MeCN, r.t. to 60 °C; (2)  $\text{H}_2\text{NCH}_2\text{CH}_2\text{CO}_2\text{Me}$ , *i*-Pr $_2$ NEt, DMF, r.t.; (ii)  $\text{Boc}_2\text{O}$ , DMAP, THF; (iii)  $\text{H}_2$ , Pd/C, THF-MeOH, r.t.; (iv) NIS, MeCN, 0 °C; (v) *n*-propyl magnesium chloride, zinc chloride, PdCl $_2$ (dppf), THF, reflux; (vi) ethyl 3-(2-aminothiophen-3-yl)propanoate **17**, phosgene, Et $_3$ N, CH $_2$ Cl $_2$ , 0 °C; (vii) aq. NaOH, THF-MeOH. *i* = iso, *n* = normal, *t*-Bu = *tert*-butyl, DMF = *N,N*-dimethylformaldehyde, Boc = *t*-BuOCO, THF = tetrahydrofuran, NIS = *N*-iodosuccinimide, Me = methyl, r.t. = room temperature, Pr = propyl, Et = ethyl, DMAP = 4-dimethylaminopyridine, dppf = 1,1'-bis(diphenylphosphino)ferrocene, TFA = trifluoroacetic acid.

### Methyl 3-((5-nitrobenzo[d]thiazol-2-yl)amino)propanoate (4)

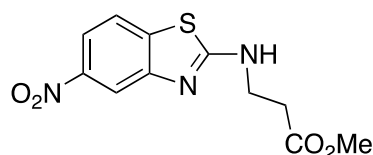

Isoamyl nitrite (3.1 mL, 23 mmol) was added to a mixture of  $\text{CuCl}_2 \cdot 2\text{H}_2\text{O}$  (3.15 g, 18.5 mmol) in acetonitrile (40 mL) and stirred for 10 min at room temperature. Then 5-nitrobenzo[d]thiazol-2-amine **1** (3.00 g, 15.4 mmol) was added and the mixture was stirred at room temperature for 30 min, and at 60 °C for 1 h. The mixture was diluted with 1 N aqueous HCl, filtered and extracted with ethyl acetate. The organic extract was dried (magnesium sulfate) and concentrated *in vacuo*. The crude product was passed through a pad of silica gel (ethyl acetate), concentrated *in vacuo* and then re-dissolved in *N,N'*-dimethylformamide (40 mL). Methyl 3-aminopropanoate hydrochloride (10.7 g, 77 mmol) and diisopropylethylamine (26.8 mL, 154 mmol) were added to the solution. After stirred at room temperature for 16 h, the mixture was diluted with ethyl acetate and washed with brine three times. The solvent was removed *in vacuo* and the residue was purified by column chromatography (1:3 to 2:3 ethyl acetate : hexane) to yield *the title compound 4* as a yellow solid (1.79 g, 6.37 mmol, 41 % yield);  $\delta_{\text{H}}$  (400 MHz,  $\text{DMSO-}d_6$ ) 8.58 (1 H, t, *J* 5.4), 8.08 (1 H, d, *J* 2.2), 7.92 (1 H, d, *J* 8.6), 7.87 (1 H, dd, *J* 8.6, 2.2 Hz), 3.60 - 3.69 (5 H, m), 2.71 (2 H, t, *J* 6.6);  $\delta_{\text{C}}$  (101 MHz,  $\text{DMSO-}d_6$ ) 171.7, 168.1, 152.8, 146.1, 138.6, 121.5, 115.6, 111.8, 51.5, 33.1; IR 3367, 2362, 1734, 1547, 1512, 1340; HRMS (ESI) calculated for  $\text{C}_{11}\text{H}_{12}\text{N}_3\text{O}_4\text{S}$  [(M+H)<sup>+</sup>]: 282.0543 found 282.0543.

### Methyl 3-((tert-butoxycarbonyl)(5-nitrobenzo[d]thiazol-2-yl)amino)propanoate (7)

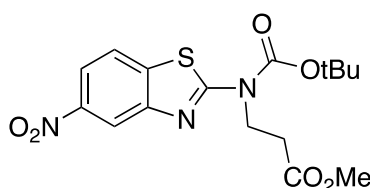

A mixture of amine **4** (2.37 g, 8.43 mmol), di-*tert*-butyldicarbonate (2.76 g, 12.7 mmol) and 4-(dimethylamino)pyridine (102 mg, 0.84 mmol) in tetrahydrofuran (20 mL) was stirred for 4 h at room temperature. The solvent was removed *in vacuo* and the residue was purified by column chromatography (1:9 – 3:7 diethyl ether:petroleum ether 30-40) to yield *the title compound 7* as a pale yellow foam (2.87 g, 89 % yield).  $\delta_{\text{H}}$  (400 MHz,  $\text{CDCl}_3$ ) 8.47 (1 H, d, *J* 2.2) 8.02 (1 H, dd, *J* 8.6, 2.2) 7.77 (1 H, d, *J* 8.8) 4.44 (2 H, t, *J* 7.5) 3.65 (3 H, s) 2.77 (2 H, t, *J* 7.3) 1.57 (9 H, s);  $\delta_{\text{C}}$  (101 MHz,  $\text{CDCl}_3$ ) 171.3, 162.6, 152.3, 149.0, 146.3, 140.2, 120.9, 117.7, 116.0, 84.8, 51.6, 43.3, 32.2, 27.9; IR 2981, 1712, 1517, 1342, 1253, 1148; HRMS (CI+) calculated for  $\text{C}_{16}\text{H}_{20}\text{N}_3\text{O}_6\text{S}$ : 382.1073 found 382.1074.

### Methyl 3-((5-aminobenzo[d]thiazol-2-yl)(tert-butoxycarbonyl)amino)propanoate (**41**)

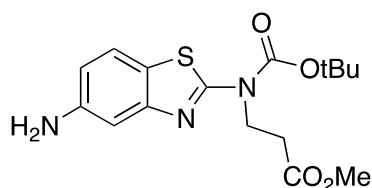

Nitro compound **7** (2.54g, 6.67 mmol) and palladium/carbon (10 % w/w, 707 mg, 0.67 mmol Pd) were combined in tetrahydrofuran (20 mL) and methanol (20 mL) and the mixture was stirred under hydrogen atmosphere (balloon pressure) for 2.5 h. The mixture was filtered and concentrated *in vacuo* to yield *the title compound 41* (2.21 g, 94 % yield);  $\delta_{\text{H}}$  (600 MHz,  $\text{CDCl}_3$ ) 7.47 (1 H, d,  $J$  8.4), 7.08 (1 H, d,  $J$  2.0), 6.66 (1 H, dd,  $J$  8.4, 2.0), 4.47 (2 H, t,  $J$  7.5), 3.68 (5 H, br), 2.79 (2 H, t,  $J$  7.5 Hz) 1.59 (9 H, s);  $\delta_{\text{C}}$  (151 MHz,  $\text{CDCl}_3$ ) 171.8, 161.0, 152.5, 150.5, 145.1, 123.4, 121.0, 112.9, 106.7, 84.0, 51.7, 43.2, 32.7, 28.1; IR 3371, 1712, 1504, 1439, 1394, 1150; HRMS ( $\text{Cl}^+$ ) calculated for  $\text{C}_{16}\text{H}_{22}\text{N}_3\text{O}_4\text{S}$  [( $\text{M}+\text{H}$ ) $^+$ ]: 352.1331 found 352.1331.

### Methyl 3-((5-amino-4-iodobenzo[d]thiazol-2-yl)(tert-butoxycarbonyl)amino)propanoate (**10**)

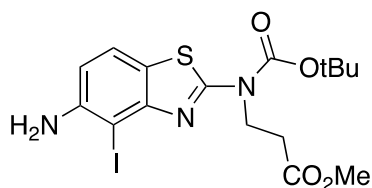

*N*-Iodosuccinimide (1.32 g, 5.86 mmol) was added to a solution of aniline **41** (2.06 g, 5.86 mmol) in acetonitrile (20 mL) and the mixture was stirred at room temperature for 15 min. Aqueous sodium thiosulfate was added and the mixture was extracted with ethyl acetate. The organic extract was concentrated *in vacuo* and the residue was purified by column chromatography (1: 19 to 2 : 3 ethyl acetate : hexane) to yield *the title compound 10* as a light yellow solid (2.36 g, 4.95 mmol, 84 % yield);  $\delta_{\text{H}}$  (500 MHz,  $\text{CDCl}_3$ ) 7.42 (1 H, d,  $J$  8.2), 6.71 (1 H, d,  $J$  8.4), 4.52 (2 H, t,  $J$  7.3), 4.22 (2 H, br), 3.69 (3 H, s), 2.87 (2 H, t,  $J$  7.3), 1.60 (9 H, s);  $\delta_{\text{C}}$  (126 MHz,  $\text{CDCl}_3$ ) 171.9, 160.3, 152.5, 151.1, 145.9, 121.3, 120.8, 111.9, 84.2, 77.3, 51.8, 43.5, 32.5, 28.2; IR 3461, 3367, 2979, 2361, 1707, 1504, 1393, 1238, 1144; HRMS ( $\text{Cl}^+$ ) calculated for  $\text{C}_{16}\text{H}_{21}\text{IN}_3\text{O}_4\text{S}$ : 478.0297 found 478.0303.



**Methyl 3-((5-amino-4-propylbenzo[d]thiazol-2-yl)(*tert*-butoxycarbonyl)amino)propanoate (14)**

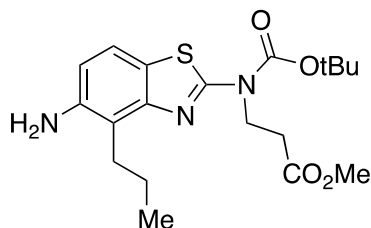

A solution of zinc(II) chloride (0.5 M in tetrahydrofuran, 42 mL, 21.0 mmol) was added to a solution of *n*-propyl magnesium chloride (2 M in diethyl ether, 10.5 mL, 21.0 mmol) and stirred for 30 min at room temperature. Iodide **10** (2.00 g, 4.19 mmol) and PdCl<sub>2</sub>(dppf) (307 mg, 0.419 mmol) were added and the mixture was heated at reflux for 1.5 h. Aqueous ammonium chloride was added and the mixture was extracted with ethyl acetate. The organic extract was concentrated *in vacuo* and purified by column chromatography (1:4 – 1:1 ethyl acetate:hexane) to yield *the title compound 14* as a red oil (295 mg, 18 % yield);  $\delta_{\text{H}}$  (400 MHz, CDCl<sub>3</sub>) 7.36 (1 H, d, *J* 8.3), 6.68 (1 H, d, *J* 8.3), 4.49 (2 H, t, *J* 7.3), 3.69 (5 H, br), 2.94 (2 H, t, *J* 7.3), 2.81 (2 H, t, *J* 7.6), 1.62 - 1.73 (2 H, m), 1.60 (9 H, s), 0.98 (3 H, t, *J* 7.3);  $\delta_{\text{C}}$  (101 MHz, CDCl<sub>3</sub>) 171.9, 159.5, 152.6, 149.3, 142.1, 123.4, 119.2, 118.2, 113.4, 83.7, 51.6, 43.3, 32.6, 28.6, 28.1, 21.9, 14.3; IR 3378, 2957, 2360, 1710, 1395, 1146; HRMS (CI<sup>+</sup>) calculated for C<sub>19</sub>H<sub>28</sub>N<sub>3</sub>O<sub>4</sub>S [(M+H)<sup>+</sup>]: 394.1801 found 394.1796.

**Ethyl 3-(2-(3-(2-((*tert*-butoxycarbonyl)(3-methoxy-3-oxopropyl)amino)-4-propylbenzo[d]thiazol-5-yl)ureido)thiophen-3-yl)propanoate (42)**

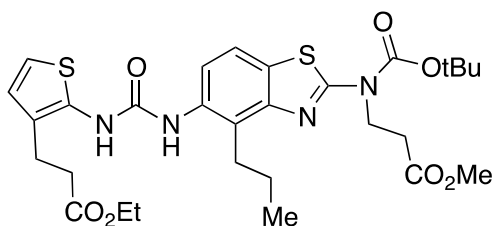

A solution of ethyl 3-(2-aminothiophen-3-yl)propanoate **17** (152 mg, 0.762 mmol) in dichloromethane (5 mL) was added to a solution of phosgene (20 % in toluene, 0.62 mL, 1.22 mmol) at 0 °C. Triethylamine (0.34 mL, 2.4 mmol) was added and the mixture was stirred at 0 °C for 30 min, then concentrated *in vacuo*. The residue was dissolved in dichloromethane (5 mL). Triethylamine (0.34 mL, 2.4 mmol) and aniline **14** (295 mg, 0.749 mmol) were added and the mixture was stirred for 1 h, then diluted with water and extracted with dichloromethane. The organic extract was concentrated *in vacuo* and the residue was purified by column chromatography (1:9 to 1:2 ethyl acetate : hexane) to give *the title compound 42* as a pale yellow solid (181 mg, 0.292 mmol, 14 % yield);  $\delta_{\text{H}}$  (400 MHz, CDCl<sub>3</sub>) 7.43-7.54 (2H, m), 6.88 (1H, br), 6.59-6.71 (2H, m), 4.36-4.45 (2H, m), 3.91 (2H, q, *J* 7.1), 3.61

(3H, s), 2.88 (2H, t, *J* 7.5), 2.73 (4H, t, *J* 7.48), 2.44-2.53 (2H, m), 1.44-1.62 (12H, m), 1.05-1.11 (3H, m), 0.83 (3H, t, *J* 7.3);  $\delta_c$  (126 MHz, CDCl<sub>3</sub>) 173.8, 171.8, 159.7, 154.5, 152.5, 148.9, 135.7, 134.7, 132.7, 130.5, 126.4, 126.1, 125.5, 121.2, 118.4, 84.1, 60.8, 51.7, 43.4, 34.4, 32.5, 29.3, 28.2, 23.1, 22.2, 14.2, 14.1; IR 3301, 2960, 2360, 1709, 1510, 1396, 1245, 1153; HRMS (ESI) calculated for C<sub>29</sub>H<sub>39</sub>N<sub>4</sub>O<sub>7</sub>S<sub>2</sub> [(M+H)<sup>+</sup>]: 619.2255 found 619.2253.

### 3-(2-(3-(2-((*tert*-Butoxycarbonyl)(2-carboxyethyl)amino)-4-propylbenzo[d]thiazol-5-yl)ureido)thiophen-3-yl)propanoic acid (19)

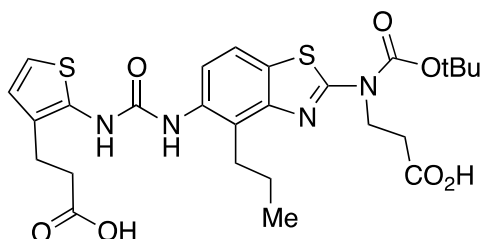

2 *N* Aqueous NaOH (0.366 mL, 0.732 mmol) was added to a solution of diester **42** (181 mg, 0.292 mmol) in tetrahydrofuran (3 mL) and methanol (3 mL). The mixture was stirred at room temperature for 3 h, then acidified with 3 *N* aqueous HCl and extracted with ethyl acetate. The organic extract was washed with brine, dried (magnesium sulfate) and concentrated *in vacuo*. The residue was purified by column chromatography (1:1 ethyl acetate : hexane, then 100 % ethyl acetate, then 1:5 methanol : ethyl acetate) to give the title compound **19** as a pale yellow solid (6.3 mg, 10.9 mmol, 4 % yield);  $\delta_H$  (400 MHz, CD<sub>3</sub>OD) 7.51 (1H, d, *J* 8.5), 7.37 (1H, d, *J* 8.5), 6.85 (1H, d, *J* 5.5), 6.70 (1H, d, *J* 5.7), 4.39 (2H, t, *J* 7.3), 2.94-2.98 (2H, m), 2.73-2.80 (2H, m), 2.67 (2H, t, *J* 7.3), 2.50 (2H, t, *J* 7.5), 1.55-1.63 (2H, m), 1.52 (9H, s), 0.89 (3H, t, *J* 7.3);  $\delta_c$  (125 MHz, DMSO-*d*<sub>6</sub>) 174, 172.4, 159.2, 152.8, 152.2, 148.3, 135.0, 134.2, 127.6, 126.1, 125.7, 122.6, 120.1, 118.1, 116.1, 83.6, 43.4, 33.9, 32.4, 28.4, 27.6, 22.6, 22.3, 14.0; IR 3346, 2960, 2930, 2871, 2360, 2341, 1710; HRMS (ESI) calculated for C<sub>26</sub>H<sub>33</sub>O<sub>7</sub>N<sub>4</sub>S<sub>2</sub> [(M-H)<sup>-</sup>]: 577.1785 found 577.1785.

### 3-(2-(3-(2-((2-Carboxyethyl)(ethoxycarbonyl)amino)benzo[d]thiazol-5-yl)ureido)thiophen-3-yl)propanoic acid (23)

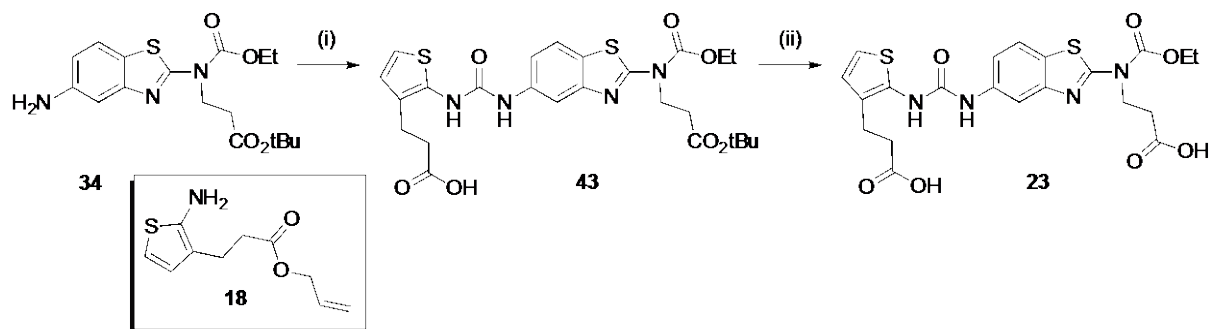

(i) (1) allyl 3-(2-aminothiophen-3-yl)propanoate **17**, phosgene, Et<sub>3</sub>N, CH<sub>2</sub>Cl<sub>2</sub>, 0 °C; (2) piperidine, Pd(PPh<sub>3</sub>)<sub>4</sub>, THF, r.t.;  
(ii) TFA, CH<sub>2</sub>Cl<sub>2</sub>. Et = ethyl, Ph = C<sub>6</sub>H<sub>5</sub>, *t*-Bu = *tert*-butyl, THF = tetrahydrofuran, TFA = trifluoroacetic acid.

**3-(2-(3-(2-((3-(*tert*-Butoxy)-3-oxopropyl)(ethoxycarbonyl)amino)benzo[d]thiazol-5-yl)ureido)thiophen-3-yl)propanoic acid (43)**

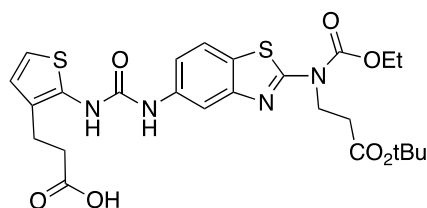

A solution of allyl 3-(2-aminothiophen-3-yl)propanoate **18** (542 mg, 2.57 mmol) in dichloromethane (5.0 mL) was added to a solution of phosgene (20 % in toluene, 2.07 mL, 4.11 mmol) at 0 °C. Triethylamine (1.15 mL, 8.22 mmol) was added and the mixture was stirred at 0 °C for 30 min. The solvent was removed *in vacuo* and the residue was dissolved in dichloromethane (5 mL). Triethylamine (1.15 mL, 8.22 mmol) and aniline **34** (940 mg, 2.57 mmol) were added, and the mixture was stirred for 1 h, then diluted with water and extracted with dichloromethane. The organic extract was concentrated *in vacuo* and the residue was purified by column chromatography (3:17 to 2:3 ethyl acetate : hexane). The purified product was dissolved in tetrahydrofuran (10 mL), then piperidine (0.980 mL, 9.88 mmol) and tetrakis(triphenylphosphine)palladium(0) (227 mg, 0.197 mmol) were added. The mixture was stirred at room temperature for 4 h, then diluted with 3 N aqueous HCl and extracted with ethyl acetate. The organic extract was concentrated *in vacuo* and purified by column chromatography (ethyl acetate) to yield *the title compound 43* as a white solid (431 mg, 0.513 mmol, 30 % yield);  $\delta_{\text{H}}$  (400 MHz, DMSO- $d_6$ ) 9.11 (1H, s), 8.97 (1H, br s), 8.06 (1H, d,  $J$  2.0), 7.84 (1H, d,  $J$  8.5), 7.27 (1H, dd,  $J$  8.6, 2.1), 6.91 (1H, d,  $J$  5.5), 6.78 (1H, d,  $J$  5.5), 4.41 (2H, t,  $J$  7.2), 4.34 (2H, q,  $J$  7.0), 2.73-2.78 (2H, m), 2.70 (2H, t,  $J$  7.3), 2.55 (3H, t,  $J$  8.1), 1.31-1.39 (12H, m);  $\delta_{\text{C}}$  (101 MHz, DMSO- $d_6$ ) 174.5, 170.4, 161.3, 153.8, 152.4, 149.7, 138.4, 135.0, 126.4, 126.2, 123.4, 121.8, 116.7, 115.6, 110.2, 80.6, 63.8, 43.3, 34.4, 33.9, 28.0, 22.7, 14.5; IR 3272, 2976, 1725, 1705, 1542, 1446, 1285, 664; HRMS (ESI) calculated for  $\text{C}_{25}\text{H}_{31}\text{N}_4\text{O}_7\text{S}_2$  [(M+H) $^+$ ]: 563.1628 found 563.1607.

**3-(2-(3-(2-((2-Carboxyethyl)(ethoxycarbonyl)amino)benzo[d]thiazol-5-yl)ureido)thiophen-3-yl)propanoic acid (23)**

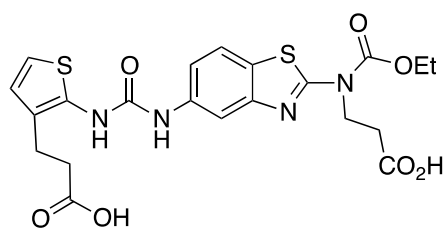

Trifluoroacetic acid (2 mL) was added to a solution of ester **43** (300 mg, 0.533 mmol) in dichloromethane (2 mL). The mixture was stirred for 6 h at room temperature, then

concentrated *in vacuo*. Toluene and dichloromethane were added, which caused the crude product to solidify. The solid was collected and washed with ethyl acetate to yield *the title compound 23* as a brown solid (260 mg, 0.513 mmol, 96 % yield);  $\delta_{\text{H}}$  (400 MHz, DMSO- $d_6$ ) 12.33 (1H, br s), 9.06 (1H, s), 8.92 (1H, s), 8.05 (1H, d,  $J$  2.0), 7.85 (1H, d,  $J$  8.5), 7.28 (1H, dd,  $J$  8.6, 2.1), 6.91 (1H, d,  $J$  5.7), 6.78 (1H, d,  $J$  5.5), 4.40 (2H, t,  $J$  7.5), 4.33 (2H, q,  $J$  7.1), 2.67-2.81 (4H, m), 2.53-2.58 (2H, m), 1.34 (3H, t,  $J$  7.1);  $\delta_{\text{C}}$  (101 MHz, DMSO- $d_6$ ) 174.5, 172.8, 161.3, 153.9, 152.4, 149.8, 138.4, 135.0, 126.4, 126.2, 123.4, 121.8, 116.7, 115.6, 110.3, 63.8, 43.4, 34.3, 32.8, 22.6, 14.5; IR 3274, 2982, 1699, 1641, 1199, 1134, 630; HRMS (ESI) calculated for  $\text{C}_{21}\text{H}_{23}\text{N}_4\text{O}_7\text{S}_2$  [(M+H) $^+$ ]: 507.0989 found 507.1002.

### Ethyl 2-(3-(2-((*tert*-Butoxycarbonyl)(methyl)amino)-4-iodobenzo[d]thiazol-5-yl)ureido)-5-ethylthiophene-3-carboxylate (24)

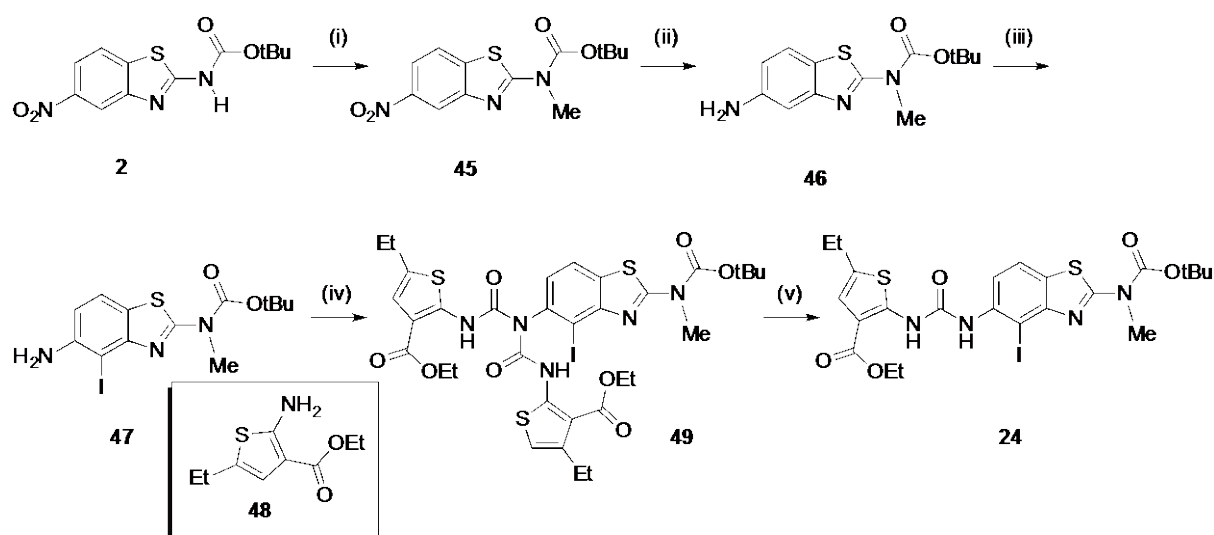

(i) NaH, DMF; MeI, 0 °C to r.t.; (ii) H<sub>2</sub>, Pd/C, THF-MeOH, r.t.; (iii) NIS, MeCN, 0 °C; (iv) methyl 2-amino-5-ethylthiophene-3-carboxylate 48, phosgene, Et<sub>3</sub>N, CH<sub>2</sub>Cl<sub>2</sub>, 0 °C; (v) K<sub>2</sub>CO<sub>3</sub>, THF-EtOH, 60 °C. Me = methyl, Et = ethyl, *t*-Bu = *tert*-butyl, DMF = *N,N*-dimethylformamide, THF = tetrahydrofuran, NIS = *N*-iodosuccinimide.

### *tert*-Butyl (5-nitrobenzo[d]thiazol-2-yl)carbamate (45)

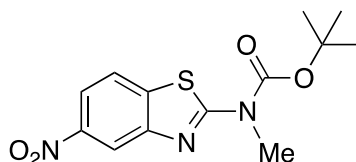

Sodium hydride (60% w/w dispersion in mineral oil, 813 mg, 20.3 mmol) was added to a solution of *tert*-butyl (5-nitrobenzo[d]thiazol-2-yl)carbamate<sup>1</sup> 2 (5.00 g, 16.9 mmol) in *N,N*-dimethylformamide (50 mL) at 0 °C. The mixture was stirred at 0 °C for 15 min. Then, methyl iodide (1.58 mL, 25.4 mmol) was added and the mixture was warmed to room temperature and stirred for 15 min. Water was added, which caused a precipitate to appear. The precipitate was collected and washed with diethyl ether and hexane to give *the title*

*compound 45* as a pale brown solid (5.20 g, 16.8 mmol, 99 % yield);  $\delta_{\text{H}}$  (400 MHz,  $\text{CDCl}_3$ ) 8.66 (1H, d,  $J$  2.1), 8.16 (1H, dd,  $J$  8.7, 2.1), 7.89 (1H, d,  $J$  8.7), 3.71 (3H, s), 1.66 (9H, s);  $\delta_{\text{C}}$  (101 MHz,  $\text{DMSO-d}_6$ ) 164.3, 149.2, 146.7, 140.7, 123.0, 118.3, 115.6, 106.1, 84.7, 35.1, 28.1; IR 2925, 1714, 1649, 1415, 1303, 738; HRMS (ESI) calculated for  $\text{C}_{13}\text{H}_{16}\text{N}_3\text{O}_4\text{S}$  [(M+H)<sup>+</sup>]: 310.0856 found 310.0843.

***tert*-Butyl (5-aminobenzo[d]thiazol-2-yl)(methyl)carbamate (46)**

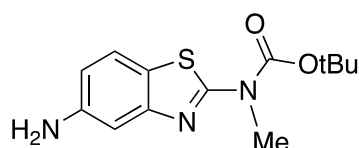

Nitro compound **45** (4.00 g, 12.9 mmol) and palladium on carbon (10 % w/w, 3.00 g, 2.83 mmol Pd) were combined in tetrahydrofuran (20 mL) and methanol (20 mL). The mixture was stirred under hydrogen atmosphere (balloon pressure) for 4 h, then filtered and concentrated *in vacuo*. The residue was purified by column chromatography (3:7 to 1:1 ethyl acetate : hexane) to yield *the title compound 46* as a white solid (2.85 g, 10.2 mmol, 79 % yield);  $\delta_{\text{H}}$  (400 MHz,  $\text{CDCl}_3$ ) 7.52 (1H, d,  $J$  8.4), 7.14 (1H, d,  $J$  2.1), 6.70 (1H, dd,  $J$  8.3, 2.2), 3.77 (2H, br), 3.66 (3H, s), 1.63 (9H, s);  $\delta_{\text{C}}$  (101 MHz,  $\text{CDCl}_3$ ) 162.3, 153.1, 150.4, 145.1, 123.1, 112.9, 106.6, 83.6, 34.6, 28.2; IR 3204, 1791, 1596, 1421, 1144, 847; HRMS (ESI) calculated for  $\text{C}_{13}\text{H}_{18}\text{N}_3\text{O}_2\text{S}$  [(M+H)<sup>+</sup>]: 280.1114 found 280.1103.

***tert*-Butyl (5-amino-4-iodobenzo[d]thiazol-2-yl)(methyl)carbamate (47)**

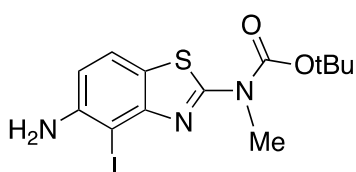

*N*-Iodosuccinimide (1.49 g, 6.62 mmol) was added to a solution of aniline **46** (1.85 g, 6.62 mmol) in acetonitrile (20 mL) at 0 °C. The mixture was warmed to room temperature and stirred for 10 min. Aqueous sodium thiosulfate was added and the mixture was extracted with ethyl acetate. The organic extract was concentrated *in vacuo* and the residue was purified by column chromatography (1:19 to 1:8 ethyl acetate : hexane) to yield *the title compound 47* as a yellow solid (1.88 g, 4.64 mmol, 70 % yield);  $\delta_{\text{H}}$  (400 MHz,  $\text{CDCl}_3$ ) 7.40 (1H, d,  $J$  8.3), 6.71 (1H, d,  $J$  8.3), 4.23 (2H, br s), 3.68 (3H, s), 1.61 (9H, s);  $\delta_{\text{C}}$  (101 MHz,  $\text{CDCl}_3$ ) 161.1, 153.2, 151.1, 145.8, 121.4, 120.8, 111.8, 83.7, 77.2, 34.6, 28.2; IR 1700, 1372, 1219, 1148; HRMS (ESI) calculated for  $\text{C}_{13}\text{H}_{17}\text{IN}_3\text{O}_2\text{S}$  [(M+H)<sup>+</sup>]: 406.0080 found 406.0067.

**Diethyl 2,2'-(((2-((tert-butoxycarbonyl)(methyl)amino)-4-iodobenzo[d]thiazol-5-yl)azanediyl)bis(carbonyl))bis(azanediyl))bis(5-ethylthiophene-3-carboxylate) (49)**

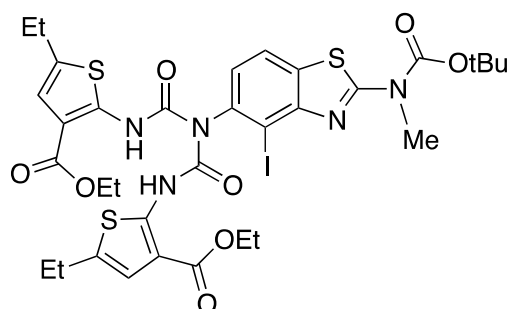

A solution of methyl 2-amino-5-ethylthiophene-3-carboxylate **48** (917 mg, 4.60 mmol) in dichloromethane (20 mL) was added to a solution of phosgene (20 % in toluene, 3.88 mL, 7.36 mmol) at 0 °C. Triethylamine (2.06 mL, 14.7 mmol) was added and the mixture was stirred for 30 min at 0 °C, then concentrated *in vacuo*. The residue was dissolved in dichloromethane (20 mL). Triethylamine (2.06 mL, 14.7 mmol) and aniline **47** (746 mg, 1.84 mmol) were added and the mixture was stirred for 1 h at room temperature, then diluted with water and extracted with dichloromethane. The organic extract was concentrated *in vacuo* and purified by column chromatography (1:19 to 1:4 ethyl acetate : hexane) to yield *the title compound 49* as a pale yellow solid (1.41 g, 1.64 mmol, 89 % yield);  $\delta_{\text{H}}$  (400 MHz,  $\text{CDCl}_3$ ) 7.94 (1H, d, *J* 8.2), 7.38 (1H, d, *J* 8.2), 6.90 (2H, s), 4.18-4.29 (4H, m), 3.73 (3H, s), 2.69-2.82 (4H, m), 1.67 (9H, s), 1.22-1.35 (12H, m);  $\delta_{\text{C}}$  (101 MHz,  $\text{CDCl}_3$ ) 164.4, 162.2, 153.3, 152.5, 151.1, 146.0, 137.1, 136.0, 133.5, 124.7, 122.2, 119.8, 113.4, 95.53, 84.4, 60.4, 34.7, 28.2, 22.8, 15.5, 14.4; IR 1700, 1441, 1192, 1149, 772; HRMS (ESI) calculated for  $\text{C}_{33}\text{H}_{38}\text{I}\text{N}_5\text{NaO}_8\text{S}_3$  [(M+Na)<sup>+</sup>]: 879.09217 found 879.08294.

**Ethyl 2-(3-(2-((tert-butoxycarbonyl)(methyl)amino)-4-iodobenzo[d]thiazol-5-yl)ureido)-5-ethylthiophene-3-carboxylate (24)**

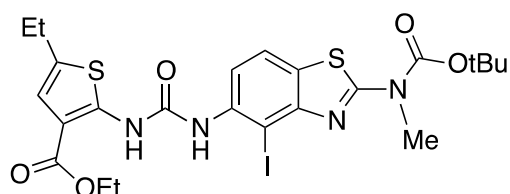

Potassium carbonate (467 mg, 3.30 mmol) was added to a mixture of urea **49** (1.41 g, 1.65 mmol) in tetrahydrofuran (10 mL) and ethanol (10 mL). The mixture was stirred at 60 °C for 30 min, then filtered and concentrated *in vacuo*. The residue was purified by column chromatography (1:19 to 1:4 ethyl acetate : hexane) to yield *the title compound 24* as a pale brown solid (973 mg, 1.53 mmol, 93 % yield);  $\delta_{\text{H}}$  (400 MHz,  $\text{CDCl}_3$ ) 10.58 (1H, s), 7.91 (1H, d, *J* 8.5), 7.68 (1H, d, *J* 1.1), 7.04 (1H, s), 6.85 (1H, t, *J* 1.1), 4.30 (2H, q, *J* 7.7), 3.70 (3H, s), 2.74 (2H, dd, *J* 7.5, 1.0), 1.62 (9H, s), 1.37 (3H, d, *J* 6.5), 1.30 (3H, t, *J* 6.9);  $\delta_{\text{C}}$  (101 MHz,  $\text{CDCl}_3$ )

165.7, 161.7, 153.2, 151.1, 151.0, 149.1, 136.7, 128.2, 120.9, 118.9, 118.9, 110.6, 86.5, 84.1, 60.4, 34.6, 28.2, 22.8, 15.5, 14.4; IR 1703, 1666, 1559, 1246, 1187, 761; HRMS (ESI) calculated for  $C_{23}H_{28}IN_4O_5S_2$  [(M+H)<sup>+</sup>]: 631.0514 found 631.0540.

### 3. Conformational analysis

#### X-ray crystallography

Single crystals of **24** were obtained by vapour diffusion (chloroform/hexane). Low temperature (100 K) diffraction studies were carried out using Beamline I19(EH1) at Diamond Light Source.<sup>2</sup> Raw frame data were reduced using CrysAlisPRO (Oxford Diffraction/Agilent Technologies UK Ltd, Yarnton, England) and the structure was solved using SuperFlip.<sup>3</sup> Full-matrix least-squares refinement of the structures was carried out using CRYSTALS.<sup>4,5</sup> Crystallographic data (excluding structure factors) have been deposited with the Cambridge Crystallographic Data Centre (CCDC 1453550) and copies of these data can be obtained free of charge via [www.ccdc.cam.ac.uk/data\\_request/cif](http://www.ccdc.cam.ac.uk/data_request/cif).

#### NMR spectroscopy

The 2D NOESY spectrum of **20** (17 mg•mL<sup>-1</sup> in d<sub>6</sub>-DMSO) was recorded at 298 K on a Bruker AVIII HD 600 with BB-F/1H Prodigy nitrogen cryoprobe using 0.5 s mixing time and 10 s relaxation delay.



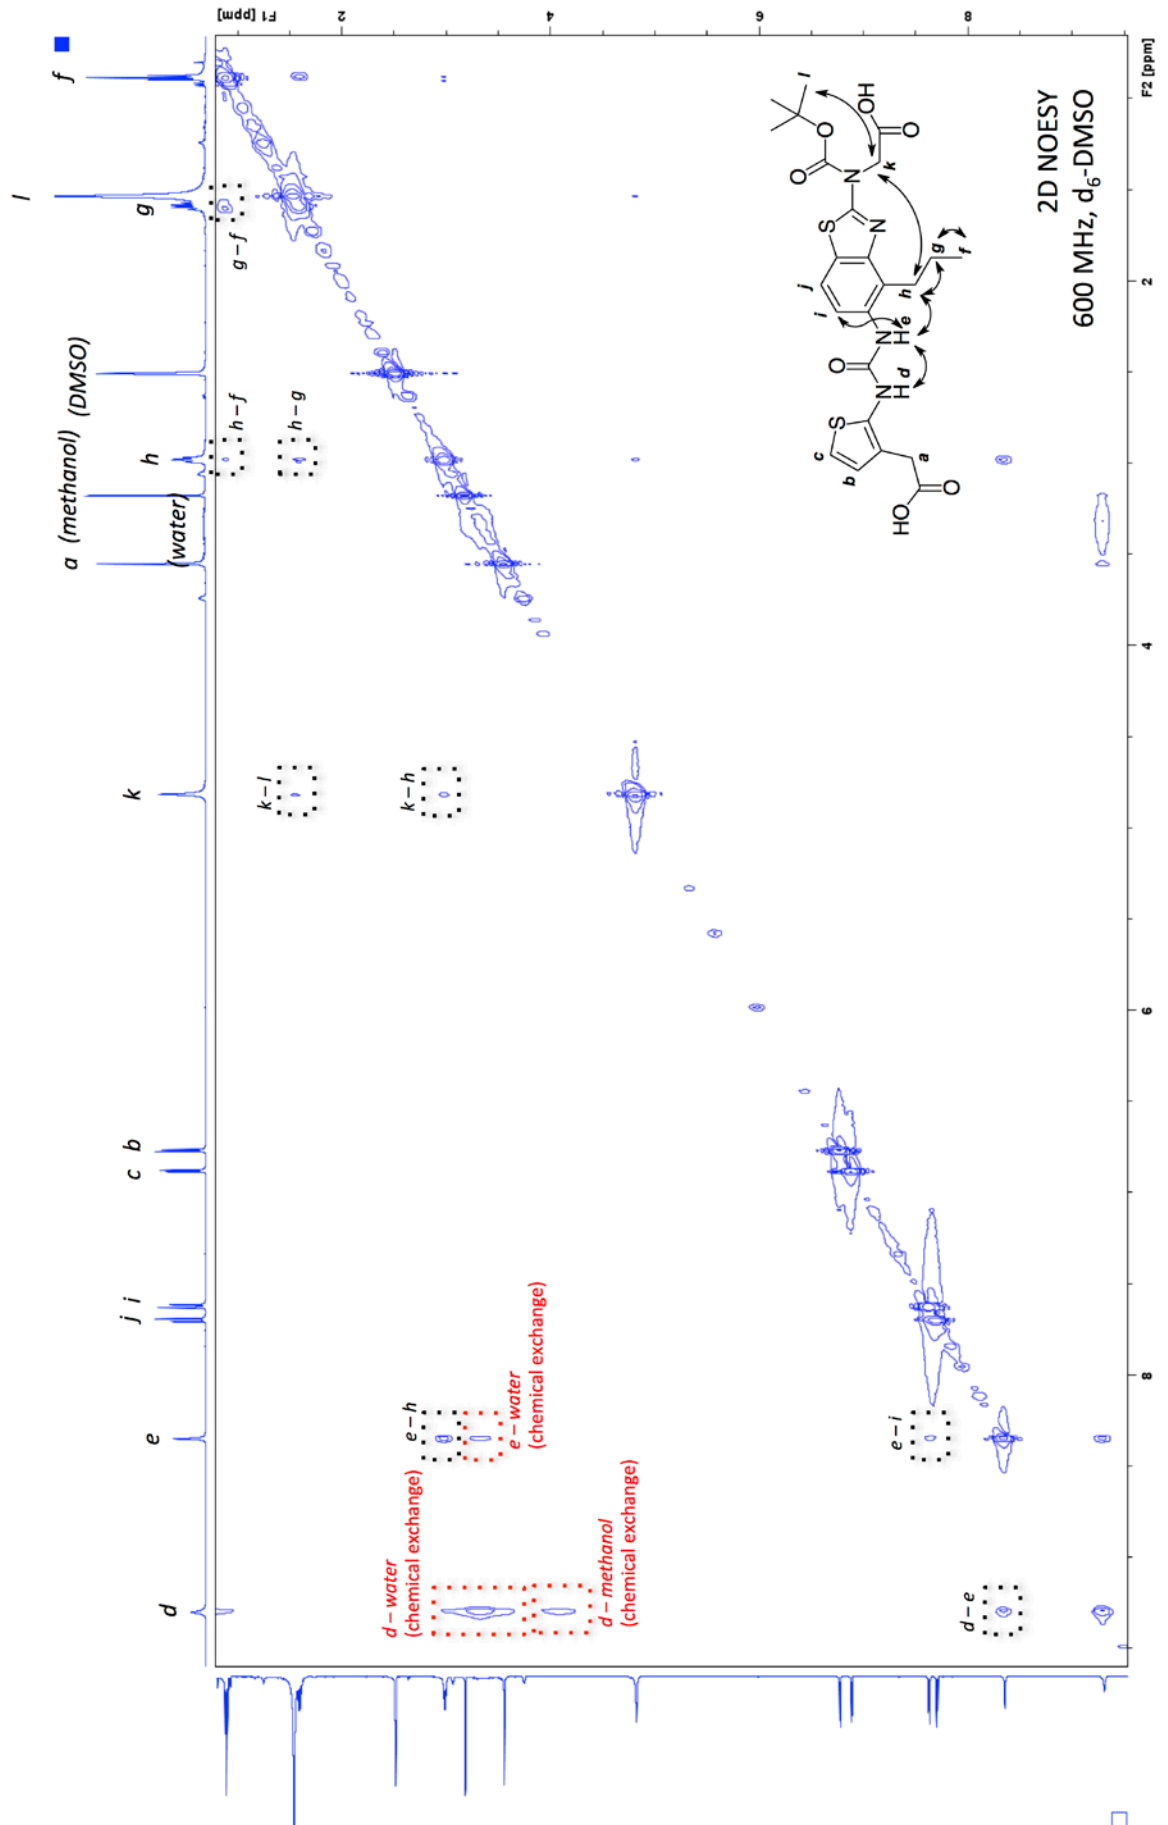

## 4. IAPP Experimental Procedures

### Thioflavin T assay

Human IAPP peptide (AS-60804) was purchased from AnaSpec, Inc. The peptide was dissolved in hexafluoroisopropanol and left to stand for 1 h. It was then evaporated to dryness under a stream of nitrogen gas, dissolved in DMSO, divided into aliquots and stored at  $-30\text{ }^{\circ}\text{C}$ .  $5\text{ mg}\cdot\text{mL}^{-1}$  liposomes were prepared in 20 mM potassium phosphate buffer, 100 mM NaCl buffer, pH 7.2 and filtered through a 100 nM extrusion film. The DOPG and DOPC lipids were obtained from Avanti Polar Lipids. In fibrillation kinetics,  $10\text{ }\mu\text{M}$  IAPP peptide,  $500\text{ }\mu\text{g}\cdot\text{mL}^{-1}$  liposome (DOPG and DOPC in a molar ratio of 1:1) and  $50\text{ }\mu\text{M}$  ThT were mixed with/without  $50\text{ }\mu\text{M}$  test compounds.  $30\text{ }\mu\text{L}$  of each sample was transferred into a 384-well plate and sealed. All of the samples were prepared on ice. The assays were recorded with an Infinite M1000 PRO microplate reader every 15 min, using excitation and emission wavelengths of 446 and 490 nm, respectively. The assays were performed in six replicates in 20 mM potassium phosphate buffer, 100 mM NaCl, pH 7.2, at  $25\text{ }^{\circ}\text{C}$ , and average fluorescence signals were calculated. Every fluorescence curve was fitted with a sigmoid equation.<sup>6</sup>  $T_{1/2}$  values are reported as the average  $\pm$  standard deviation.

### Full data (six replicates) for ThT assay

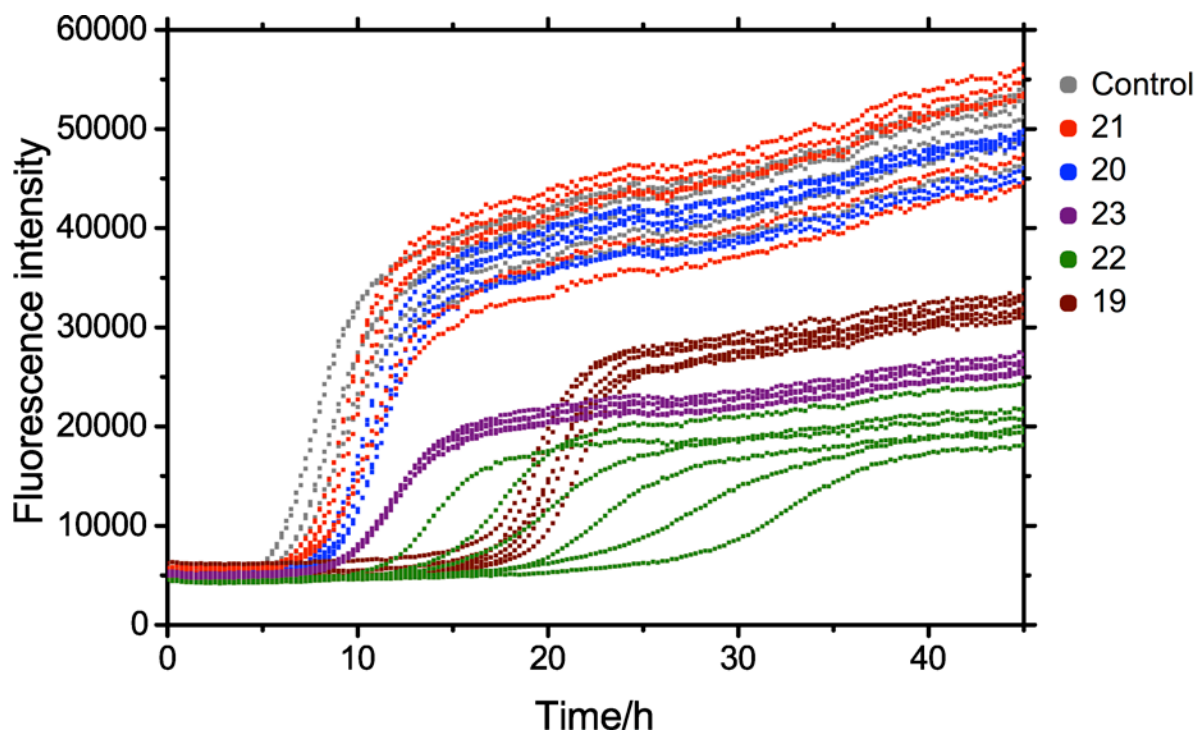

## Imaging

The samples for electron microscopy were taken from the wells after ThT assays. The samples were stained with 2 % uranyl acetate on carbon 400 mesh Cu grid. The images were taken at 120 kV on a transmission electron microscope (FEI Tecnai 12).

## Circular dichroism

IAPP (6  $\mu\text{L}$  of a 1.0 mM solution in hexafluoroisopropanol) was combined with 258  $\mu\text{L}$  of 20 mM potassium phosphate buffer, 100 mM NaCl, pH 7.2. Then, either **19** (6  $\mu\text{L}$  of a 1.0 mM solution in hexafluoroisopropanol) or an equivalent volume of hexafluoroisopropanol was added. LUVs were added (30  $\mu\text{L}$  of a 10 mg/mL stock, DOPG/DOPC 1:1, 100 nm). The sample was pipette-mixed, transferred to a 1 mm path length quartz cuvette and CD spectra were recorded at 0.5 nm intervals from 200 nm to 260 nm (Applied Photophysics Chirascan instrument). Spectral acquisitions and incubations were performed at ambient temperature. Triplicate spectra were averaged, subtracted from a triplicate-averaged background scan (i.e. a sample containing an equivalent volume hexafluoroisopropanol in place of IAPP) and then smoothed using the Savitsky–Golay method<sup>7</sup> with a polynomial order of three and a smoothing window of 10 points (OriginPro 2015 software).

## 5. Computational modeling

Structures were built in *Maestro*<sup>8</sup> and optimized in *Jaguar*.<sup>9</sup> Calculations utilized the M06-2X<sup>10</sup> hybrid meta-GGA functional in combination with a Pople 6-31G(d,p) basis set for all elements.<sup>11,12</sup> Calculations were performed using the implicit Poisson Boltzmann Finite element method,<sup>13</sup> with water as solvent. Unless otherwise stated, all energies are quoted in kJ/mol and Boltzmann populations are at 298 K and a standard state of 1 mol/L. Dihedral scans fixed angles  $\Phi_1$  and  $\Phi_2$  to the stated dihedral angle; all other distances, angles, and dihedrals were relaxed. Default convergence criteria were used.

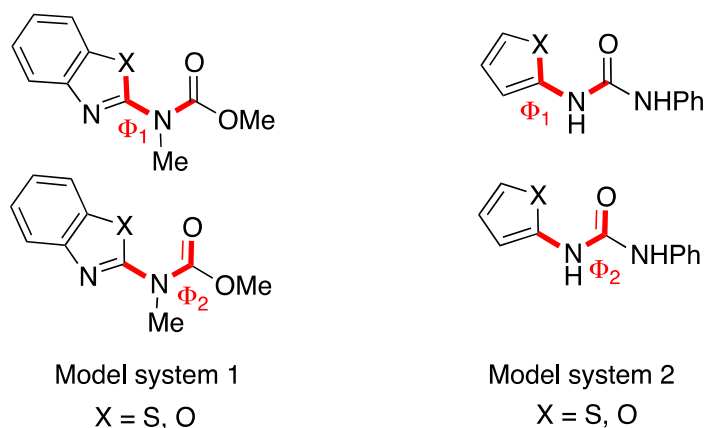

**Table of relative energies from dihedral scans**

| Dihedral angles<br>(°) |          | Relative energy (kJ/mol) |                     |                     |                     |
|------------------------|----------|--------------------------|---------------------|---------------------|---------------------|
| $\Phi_1$               | $\Phi_2$ | Model 1<br>(Sulfur)      | Model 1<br>(Oxygen) | Model 2<br>(Sulfur) | Model 2<br>(Oxygen) |
| 0                      | 0        | 0                        | 2.419518            | 0                   | 13.793014           |
| 0                      | 15       | 1.219794                 | 1.686034            | 2.914817            | 13.459237           |
| 0                      | 30       | 6.90112                  | 3.705253            | 8.825765            | 21.582155           |
| 0                      | 45       | 18.243627                | 9.535715            | 24.251367           | 28.50795            |
| 0                      | 60       | 32.74153                 | 19.494403           | 41.809089           | 37.456702           |
| 0                      | 75       | 47.368888                | 30.766374           | 51.94579            | 48.985837           |
| 0                      | 90       | 62.298922                | 44.416749           | 46.068345           | 41.85827            |
| 0                      | 105      | 45.790864                | 29.546568           | 37.88446            | 35.256327           |
| 0                      | 120      | 32.108966                | 18.273778           | 29.139882           | 27.713107           |
| 0                      | 135      | 19.820935                | 9.617453            | 24.985212           | 21.634947           |
| 0                      | 150      | 11.659239                | 4.466087            | 25.08659            | 15.959936           |
| 0                      | 165      | 7.596744                 | 2.656999            | 29.394254           | 13.970996           |
| 0                      | 180      | 6.901055                 | 2.824885            | 38.890912           | 11.935262           |
| 15                     | 0        | 1.051454                 | 0.966056            | 1.409568            | 12.403673           |
| 15                     | 15       | 6.379507                 | 3.316347            | 6.755538            | 12.176303           |
| 15                     | 30       | 13.605581                | 5.841559            | 15.429659           | 19.121685           |
| 15                     | 45       | 25.086993                | 12.557685           | 27.376031           | 25.766749           |
| 15                     | 60       | 39.756694                | 24.213453           | 37.734795           | 33.785659           |
| 15                     | 75       | 54.173373                | 39.178071           | 52.099995           | 47.86273            |
| 15                     | 90       | 52.714909                | 35.484334           | 44.75516            | 42.578702           |
| 15                     | 105      | 40.473551                | 25.743423           | 37.317202           | 35.762659           |
| 15                     | 120      | 27.677091                | 16.37088            | 31.075534           | 27.545132           |
| 15                     | 135      | 16.576754                | 8.734874            | 28.388198           | 22.333896           |
| 15                     | 150      | 9.16601                  | 3.383452            | 29.529477           | 15.656097           |
| 15                     | 165      | 6.480334                 | 1.817152            | 34.402279           | 13.271758           |
| 15                     | 180      | 7.181381                 | 1.735923            | 29.490771           | 11.101617           |
| 30                     | 0        | 4.685632                 | 0                   | 2.661527            | 10.403206           |
| 30                     | 15       | 12.971583                | 4.324549            | 9.904958            | 9.853369            |
| 30                     | 30       | 19.527725                | 10.443162           | 17.272544           | 16.771706           |
| 30                     | 45       | 31.29938                 | 17.522033           | 26.894799           | 22.981706           |
| 30                     | 60       | 45.546916                | 30.476944           | 38.104683           | 33.042507           |
| 30                     | 75       | 57.727037                | 39.486175           | 50.280395           | 45.201543           |
| 30                     | 90       | 49.343356                | 33.523295           | 44.143074           | 40.69896            |
| 30                     | 105      | 37.684291                | 25.362881           | 37.406384           | 33.261273           |
| 30                     | 120      | 25.89589                 | 17.019576           | 32.944158           | 26.090838           |
| 30                     | 135      | 16.13293                 | 9.264117            | 31.270279           | 20.084688           |
| 30                     | 150      | 9.684946                 | 3.837265            | 33.277703           | 14.988122           |
| 30                     | 165      | 6.928758                 | 0.326856            | 31.684762           | 11.71742            |
| 30                     | 180      | 9.095624                 | 0.763474            | 23.248833           | 10.309856           |

|    |     |           |           |           |           |
|----|-----|-----------|-----------|-----------|-----------|
| 45 | 0   | 10.783887 | 0.703271  | 5.678765  | 6.947049  |
| 45 | 15  | 19.43732  | 8.353102  | 11.468328 | 10.114111 |
| 45 | 30  | 24.584888 | 12.173538 | 17.905328 | 13.567615 |
| 45 | 45  | 35.725574 | 22.342046 | 25.912851 | 22.14253  |
| 45 | 60  | 49.496989 | 35.708361 | 37.753879 | 33.052643 |
| 45 | 75  | 57.512029 | 41.118699 | 48.674517 | 44.39888  |
| 45 | 90  | 49.097122 | 35.500754 | 43.152431 | 39.464741 |
| 45 | 105 | 38.127504 | 27.712093 | 37.834512 | 33.010511 |
| 45 | 120 | 27.263844 | 18.917613 | 35.312968 | 25.000156 |
| 45 | 135 | 18.368126 | 10.795014 | 33.938826 | 17.987915 |
| 45 | 150 | 12.637662 | 4.565412  | 37.161202 | 12.011257 |
| 45 | 165 | 10.234235 | 0.637105  | 24.043871 | 9.710976  |
| 45 | 180 | 12.792116 | 1.351346  | 18.443168 | 8.870611  |
| 60 | 0   | 17.289915 | 4.38724   | 7.945323  | 4.945928  |
| 60 | 15  | 26.377679 | 13.288406 | 9.564679  | 7.709833  |
| 60 | 30  | 28.814571 | 15.90354  | 19.777035 | 12.956433 |
| 60 | 45  | 39.345834 | 25.986847 | 27.231835 | 18.810397 |
| 60 | 60  | 52.245401 | 38.262531 | 38.830845 | 32.083961 |
| 60 | 75  | 64.628147 | 50.493564 | 47.537536 | 41.264088 |
| 60 | 90  | 52.345314 | 40.111876 | 44.409249 | 37.885431 |
| 60 | 105 | 41.840017 | 31.850126 | 39.871947 | 31.1536   |
| 60 | 120 | 31.571065 | 22.215882 | 37.65912  | 22.668617 |
| 60 | 135 | 23.059977 | 13.376765 | 36.417604 | 15.149747 |
| 60 | 150 | 17.478536 | 6.828413  | 28.521896 | 10.842121 |
| 60 | 165 | 15.222429 | 2.753465  | 19.12109  | 8.617995  |
| 60 | 180 | 17.616012 | 3.243144  | 15.952489 | 8.408935  |
| 75 | 0   | 24.768109 | 9.840206  | 10.291681 | 5.22695   |
| 75 | 15  | 25.847768 | 13.431487 | 13.485429 | 7.520705  |
| 75 | 30  | 31.630903 | 18.222284 | 15.991511 | 12.380712 |
| 75 | 45  | 41.559216 | 27.304812 | 26.374708 | 20.73327  |
| 75 | 60  | 53.640051 | 38.832476 | 38.043342 | 31.0449   |
| 75 | 75  | 65.420019 | 51.350155 | 48.480982 | 42.370596 |
| 75 | 90  | 58.766903 | 46.647888 | 44.537794 | 37.582749 |
| 75 | 105 | 48.393684 | 36.954357 | 40.949601 | 29.173559 |
| 75 | 120 | 37.848038 | 26.364118 | 37.199549 | 20.775135 |
| 75 | 135 | 29.160066 | 16.747021 | 31.298109 | 14.497364 |
| 75 | 150 | 22.787992 | 9.411657  | 21.853054 | 10.107516 |
| 75 | 165 | 19.713382 | 5.943984  | 16.833623 | 9.767094  |
| 75 | 180 | 23.770283 | 8.398098  | 14.393674 | 9.745153  |
| 90 | 0   | 30.841245 | 18.532332 | 11.881583 | 5.746576  |
| 90 | 15  | 26.864127 | 13.780644 | 13.520117 | 8.060741  |
| 90 | 30  | 31.708904 | 17.896916 | 17.800217 | 13.661811 |
| 90 | 45  | 40.690051 | 26.140562 | 25.472653 | 21.383137 |
| 90 | 60  | 51.745318 | 37.560101 | 35.901186 | 32.590572 |
| 90 | 75  | 62.918216 | 49.65794  | 50.032004 | 43.730327 |

|     |     |           |           |           |           |
|-----|-----|-----------|-----------|-----------|-----------|
| 90  | 90  | 64.972929 | 59.26528  | 45.533255 | 37.916225 |
| 90  | 105 | 54.407717 | 42.241255 | 41.159935 | 29.626037 |
| 90  | 120 | 43.160883 | 30.742279 | 34.919577 | 21.010458 |
| 90  | 135 | 33.496443 | 20.450699 | 25.539656 | 14.738956 |
| 90  | 150 | 26.610676 | 12.970472 | 19.744596 | 11.657573 |
| 90  | 165 | 24.12315  | 10.517166 | 15.184993 | 11.143229 |
| 90  | 180 | 28.020649 | 15.053247 | 12.089775 | 8.734192  |
| 105 | 0   | 30.935422 | 12.817939 | 12.695511 | 6.542825  |
| 105 | 15  | 25.952102 | 11.503351 | 13.091648 | 8.5794    |
| 105 | 30  | 29.89319  | 15.35553  | 15.181855 | 13.612263 |
| 105 | 45  | 38.018129 | 23.450109 | 21.786918 | 21.165928 |
| 105 | 60  | 48.40479  | 34.431197 | 35.851623 | 32.280559 |
| 105 | 75  | 59.0296   | 45.888204 | 51.382237 | 44.202303 |
| 105 | 90  | 66.917008 | 55.037581 | 46.202464 | 38.362497 |
| 105 | 105 | 57.466119 | 45.764467 | 40.011288 | 30.58143  |
| 105 | 120 | 45.685873 | 33.17987  | 32.527786 | 22.200442 |
| 105 | 135 | 35.595924 | 23.151015 | 24.584411 | 16.984081 |
| 105 | 150 | 28.368313 | 15.877463 | 18.807686 | 13.386881 |
| 105 | 165 | 26.644749 | 12.620372 | 13.913635 | 10.504508 |
| 105 | 180 | 27.393979 | 12.893773 | 11.393303 | 7.645606  |
| 120 | 0   | 24.458289 | 8.967426  | 12.895617 | 6.008305  |
| 120 | 15  | 23.773466 | 7.832183  | 11.690726 | 8.137158  |
| 120 | 30  | 27.863606 | 11.948248 | 14.004788 | 13.611336 |
| 120 | 45  | 35.089679 | 19.508445 | 21.444467 | 19.012314 |
| 120 | 60  | 44.932624 | 30.030404 | 35.518838 | 32.128398 |
| 120 | 75  | 54.6517   | 41.166665 | 52.076385 | 44.877666 |
| 120 | 90  | 61.839304 | 49.389178 | 45.737088 | 38.285155 |
| 120 | 105 | 57.755843 | 45.972257 | 39.066016 | 30.762925 |
| 120 | 120 | 45.71538  | 33.863045 | 31.669453 | 23.485343 |
| 120 | 135 | 36.130931 | 23.47125  | 23.899047 | 18.040058 |
| 120 | 150 | 29.267542 | 15.709411 | 17.030993 | 13.021756 |
| 120 | 165 | 28.747705 | 13.788563 | 12.848869 | 8.959196  |
| 120 | 180 | 23.159517 | 7.6221    | 11.744012 | 6.896012  |
| 135 | 0   | 23.422068 | 5.520857  | 11.775034 | 5.062496  |
| 135 | 15  | 22.685474 | 4.789284  | 10.484649 | 7.001331  |
| 135 | 30  | 26.695959 | 8.838414  | 13.118802 | 11.851923 |
| 135 | 45  | 33.412182 | 16.298776 | 21.554826 | 20.958524 |
| 135 | 60  | 41.721751 | 26.106304 | 36.140834 | 36.908176 |
| 135 | 75  | 50.410322 | 36.017397 | 51.851693 | 44.475954 |
| 135 | 90  | 57.01177  | 43.80865  | 45.159432 | 37.950919 |
| 135 | 105 | 56.0337   | 43.115997 | 38.0691   | 30.634129 |
| 135 | 120 | 44.422681 | 30.726377 | 30.433907 | 23.200747 |
| 135 | 135 | 34.859002 | 20.558331 | 22.114481 | 16.83899  |
| 135 | 150 | 28.474768 | 12.396395 | 15.932637 | 11.09343  |
| 135 | 165 | 27.139213 | 10.706791 | 13.604146 | 7.859664  |

|     |     |           |           |           |           |
|-----|-----|-----------|-----------|-----------|-----------|
| 135 | 180 | 22.179244 | 5.046759  | 13.727427 | 7.479028  |
| 150 | 0   | 23.276435 | 3.790788  | 11.101909 | 3.441717  |
| 150 | 15  | 22.986129 | 3.260432  | 9.850201  | 4.569952  |
| 150 | 30  | 25.761952 | 7.063342  | 16.479067 | 10.941853 |
| 150 | 45  | 31.427771 | 14.075739 | 26.362346 | 21.402769 |
| 150 | 60  | 39.066932 | 22.786926 | 35.947013 | 29.440986 |
| 150 | 75  | 47.010849 | 32.070606 | 50.420249 | 43.220164 |
| 150 | 90  | 52.836149 | 39.24333  | 43.395574 | 37.43491  |
| 150 | 105 | 53.124575 | 37.816007 | 36.621192 | 29.735507 |
| 150 | 120 | 42.249368 | 26.198094 | 28.288072 | 22.554312 |
| 150 | 135 | 33.547516 | 16.148304 | 20.646573 | 15.219336 |
| 150 | 150 | 28.429733 | 9.27591   | 16.418137 | 10.806528 |
| 150 | 165 | 25.365185 | 7.139147  | 15.885065 | 9.660998  |
| 150 | 180 | 22.932204 | 4.222526  | 18.412268 | 10.92369  |
| 165 | 0   | 24.32889  | 4.129735  | 9.765296  | 1.550501  |
| 165 | 15  | 23.562625 | 3.377678  | 9.199462  | 5.066581  |
| 165 | 30  | 24.954772 | 6.171037  | 16.027896 | 10.821761 |
| 165 | 45  | 30.205852 | 12.540971 | 28.192616 | 21.749708 |
| 165 | 60  | 37.209758 | 20.937058 | 41.798521 | 28.680344 |
| 165 | 75  | 44.982363 | 30.051308 | 48.90116  | 41.620395 |
| 165 | 90  | 50.802114 | 36.808407 | 41.940007 | 36.628685 |
| 165 | 105 | 49.279269 | 32.23324  | 35.641461 | 29.448573 |
| 165 | 120 | 39.364965 | 22.02625  | 27.212562 | 21.418201 |
| 165 | 135 | 31.750682 | 13.057933 | 21.545319 | 14.719435 |
| 165 | 150 | 27.466897 | 7.84692   | 18.934097 | 11.895629 |
| 165 | 165 | 24.642602 | 5.375654  | 21.377151 | 12.304372 |
| 165 | 180 | 23.806413 | 3.922774  | 25.004146 | 15.239041 |
| 180 | 0   | 25.126911 | 4.999456  | 8.85689   | 0         |
| 180 | 15  | 24.6099   | 4.732836  | 13.193206 | 5.583257  |
| 180 | 30  | 25.69854  | 6.451884  | 20.131246 | 12.776026 |
| 180 | 45  | 30.034489 | 12.424933 | 23.098268 | 22.963565 |
| 180 | 60  | 37.142764 | 20.971137 | 40.161858 | 32.463059 |
| 180 | 75  | 45.426941 | 30.496213 | 49.38201  | 42.745588 |
| 180 | 90  | 59.13795  | 45.888729 | 42.726134 | 37.510818 |
| 180 | 105 | 45.670445 | 28.433675 | 36.690215 | 29.556667 |
| 180 | 120 | 37.226042 | 19.437831 | 28.776015 | 21.246135 |
| 180 | 135 | 30.115258 | 12.055987 | 24.3615   | 14.66209  |
| 180 | 150 | 26.25635  | 6.711094  | 24.092045 | 15.247116 |
| 180 | 165 | 24.75559  | 4.456475  | 26.587079 | 16.111827 |
| 180 | 180 | 25.5664   | 4.34306   | 33.284124 | 22.591121 |

## 6. NMR Spectra

### *N*-((2-Fluoro-5-nitrophenyl)carbamothioyl)acetamide (27)

$^1\text{H}$ , 400 MHz,  $\text{d}_6\text{-DMSO}$

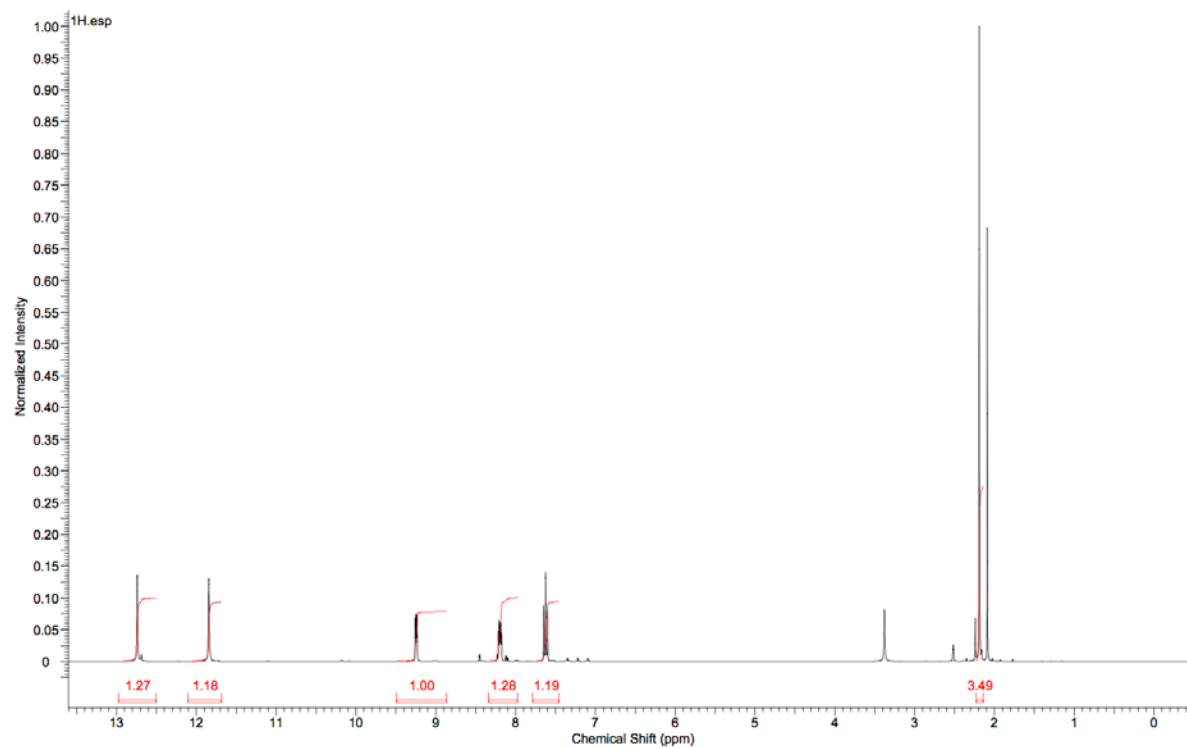

$^{13}\text{C}$ , 101 MHz,  $\text{d}_6\text{-DMSO}$

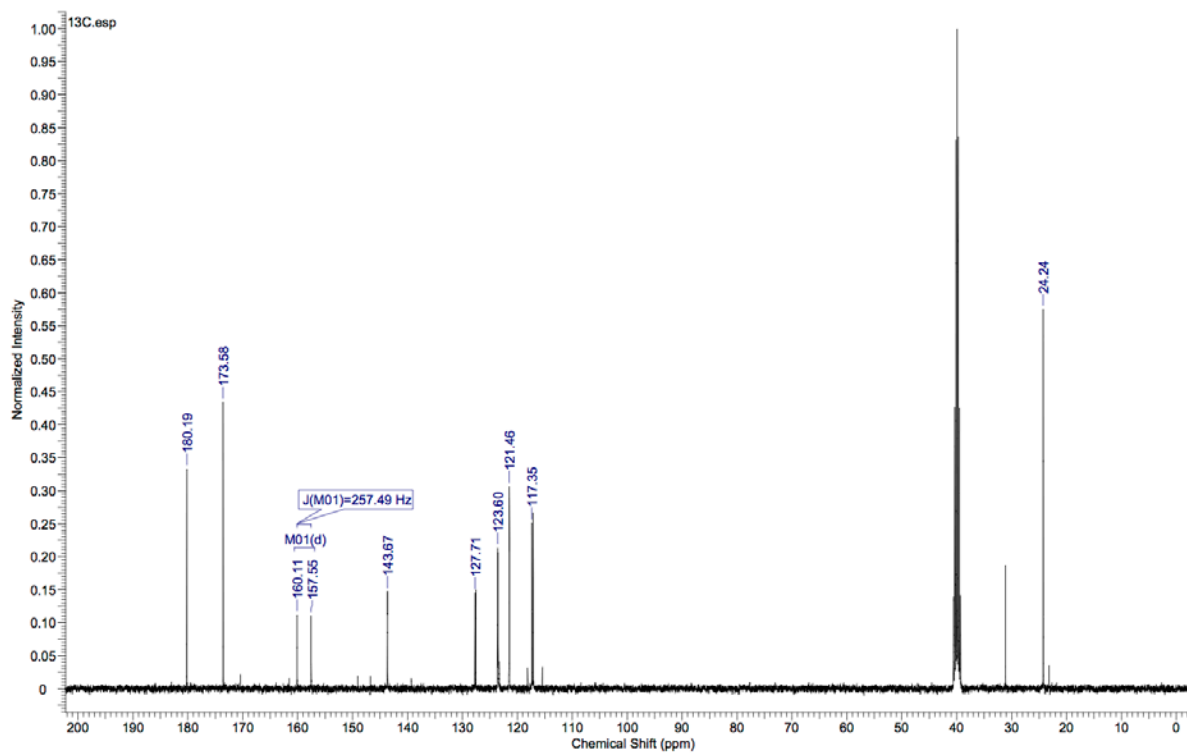



$^{19}\text{F}\{^1\text{H}\}$ , 377 MHz,  $\text{d}_6\text{-DMSO}$

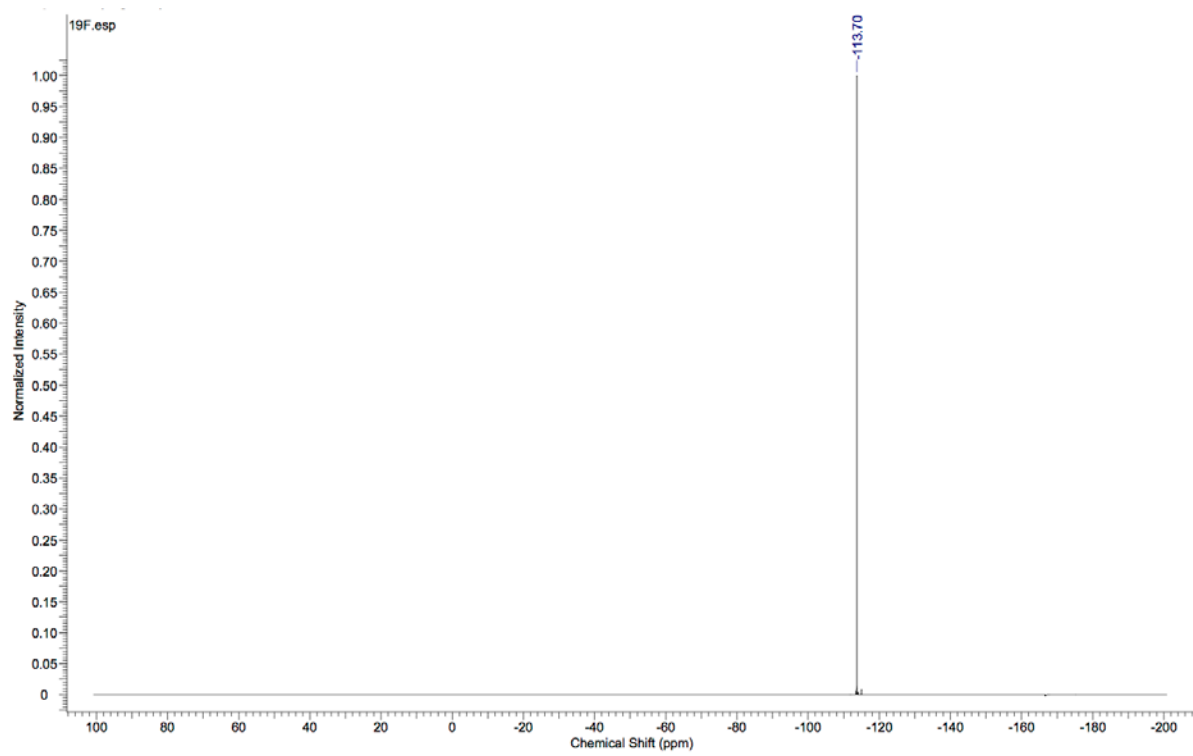

# 5-Nitrobenzo[*d*]thiazol-2-amine (1)

$^1\text{H}$ , 400 MHz,  $\text{d}_6\text{-DMSO}$

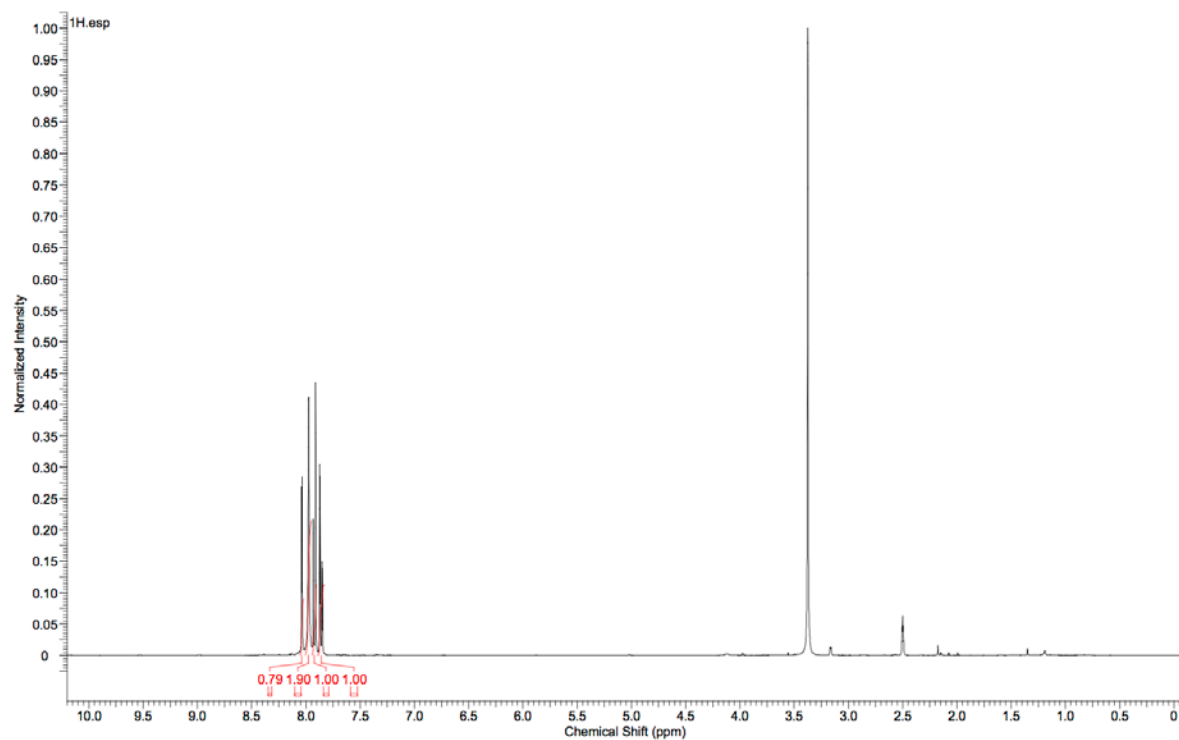

$^{13}\text{C}$ , 101 MHz,  $\text{d}_6\text{-DMSO}$

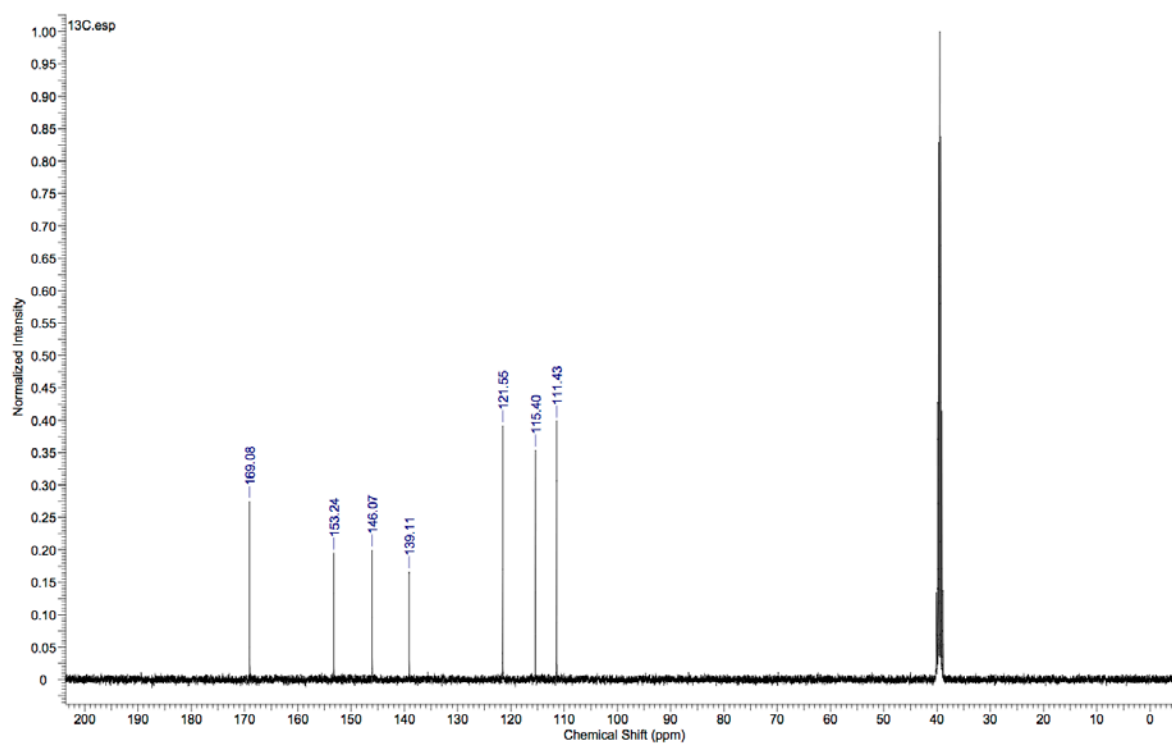

# *tert*-Butyl (5-nitrobenzo[*d*]thiazol-2-yl)carbamate (2)

<sup>1</sup>H, 400 MHz, d<sub>6</sub>-DMSO

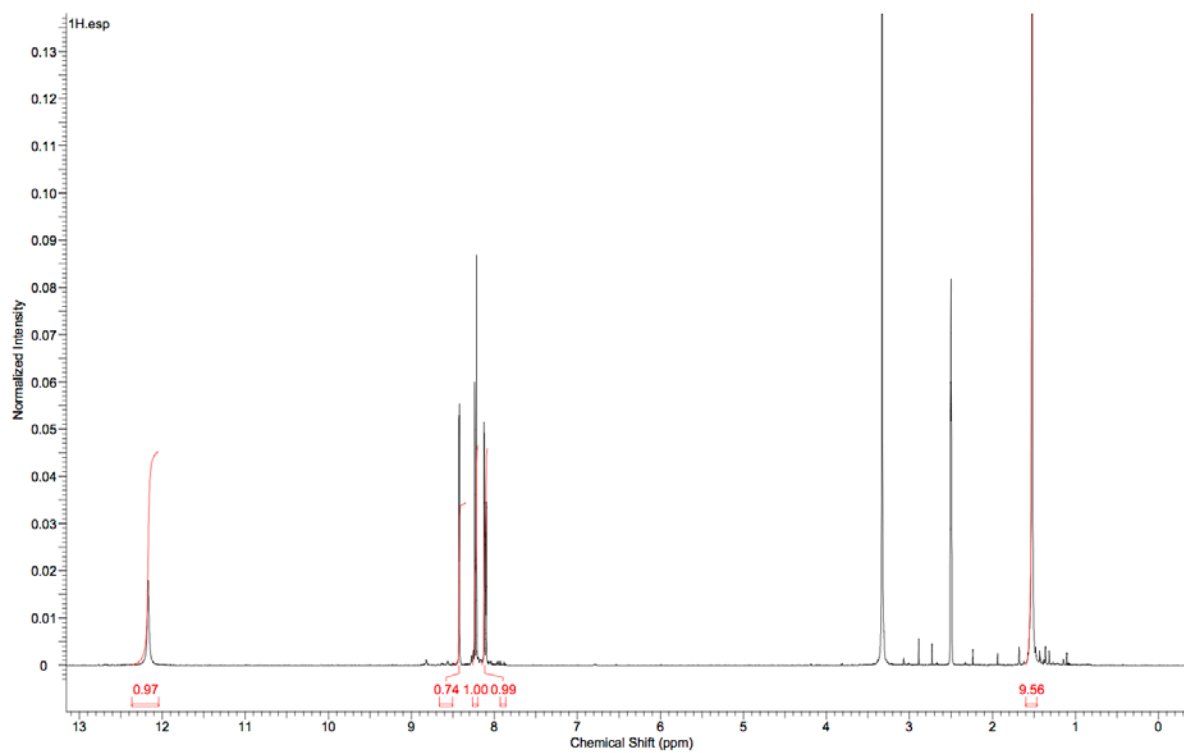

<sup>13</sup>C, 101 MHz, d<sub>6</sub>-DMSO

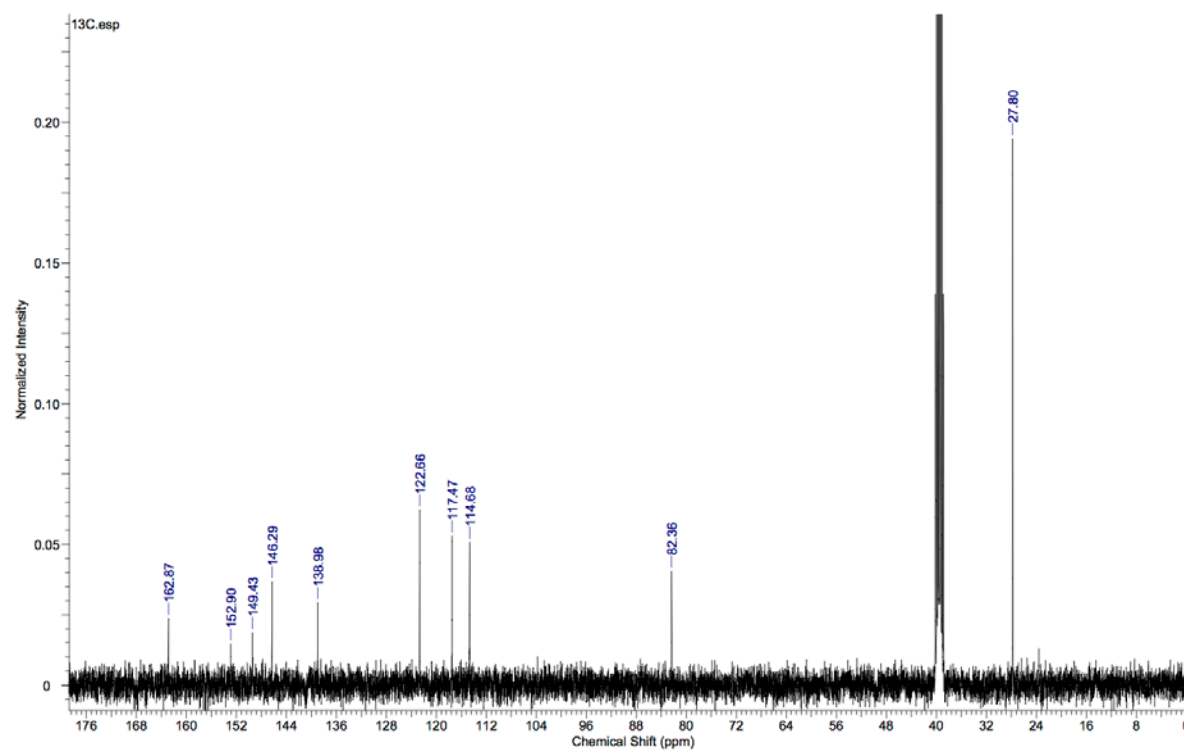

# Methyl 2-((*tert*-butoxycarbonyl)(5-nitrobenzo[d]thiazol-2-yl)amino)acetate (5)

$^1\text{H}$ , 400 MHz,  $\text{CDCl}_3$

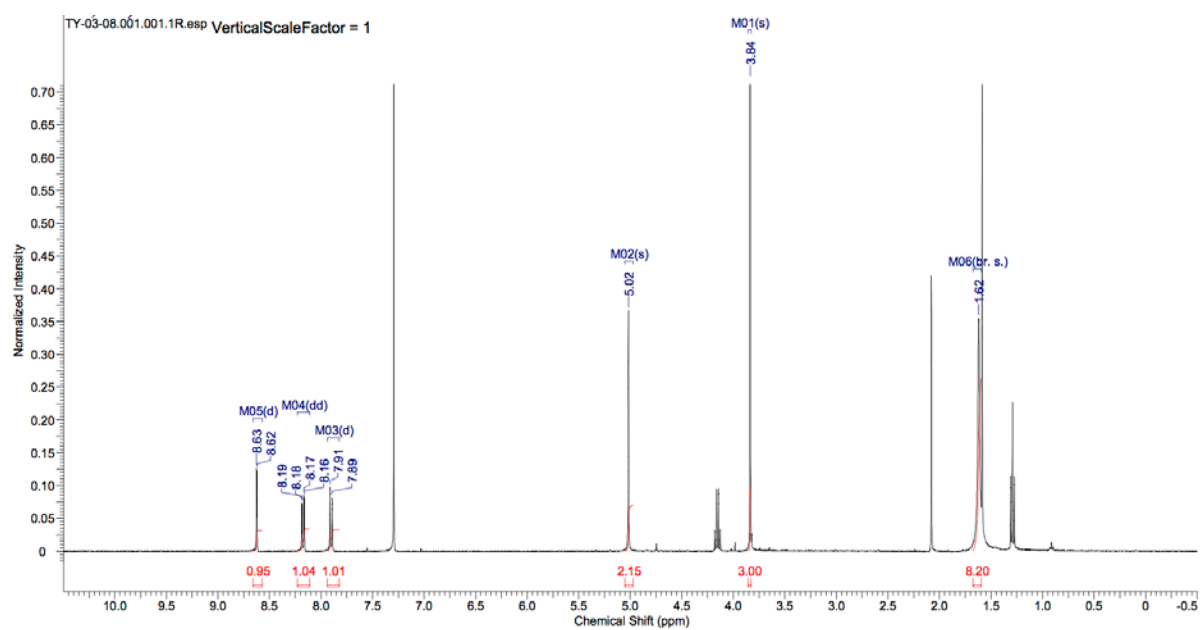

$^{13}\text{C}$ , 101 MHz,  $\text{CDCl}_3$

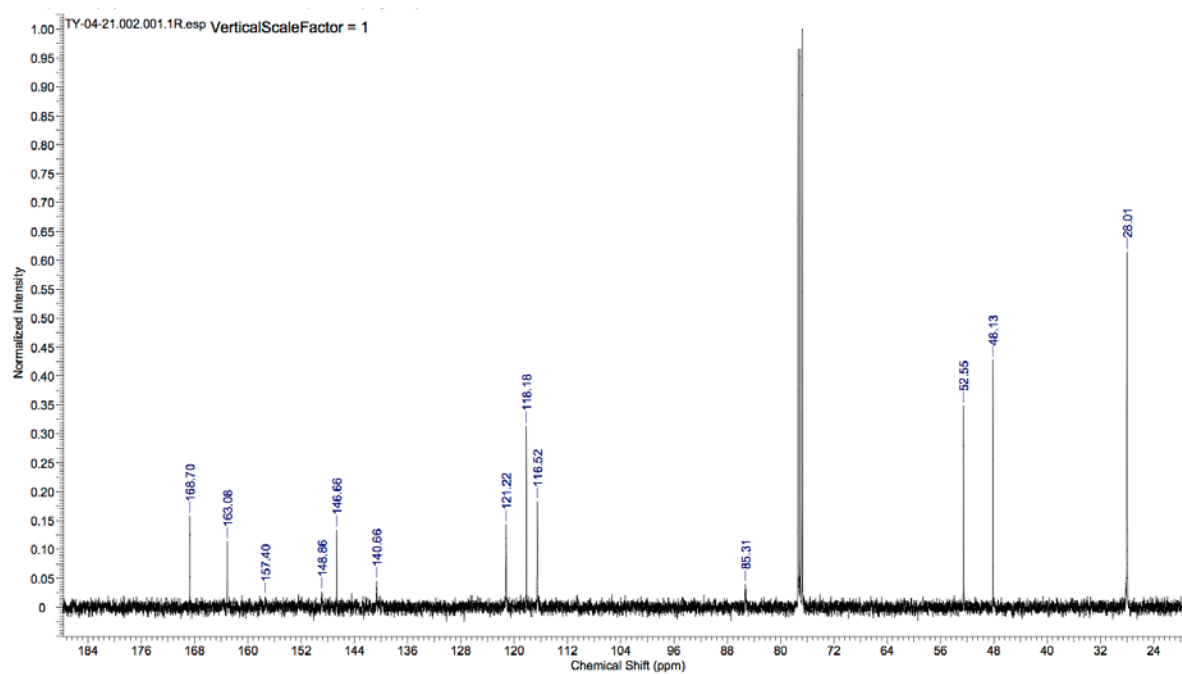

# Methyl 2-((5-aminobenzo[d]thiazol-2-yl)(*tert*-butoxycarbonyl)amino)acetate (28)

$^1\text{H}$ , 400 MHz,  $\text{CDCl}_3$

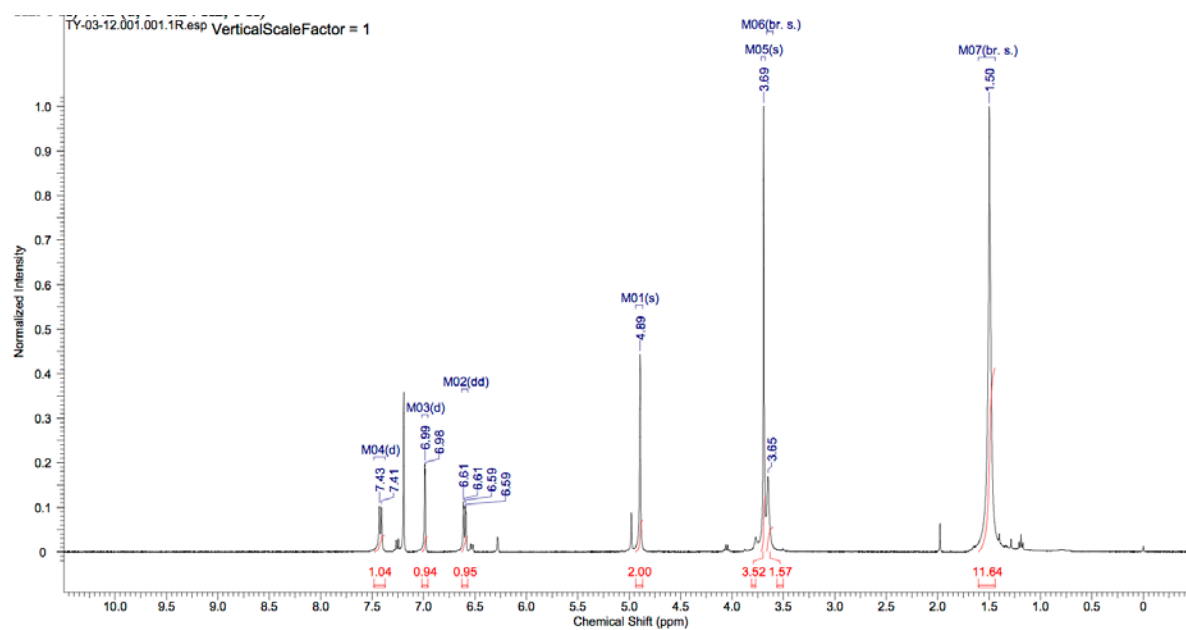

$^{13}\text{C}$ , 101 MHz,  $\text{CDCl}_3$

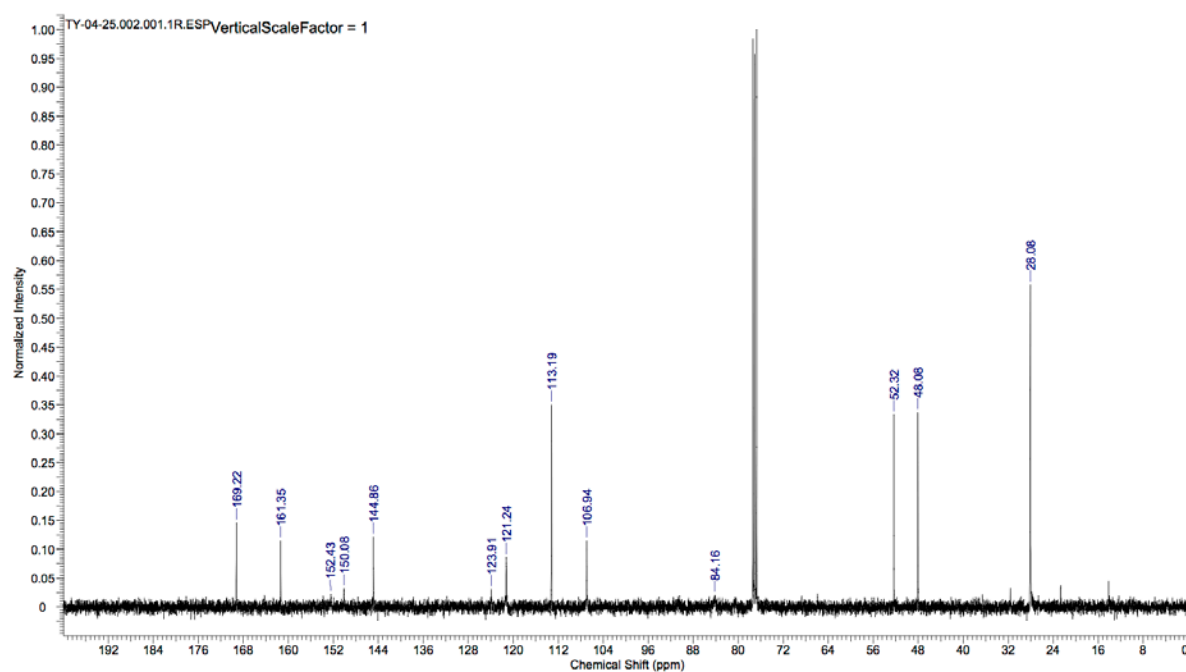

# Methyl 2-((5-amino-4-iodobenzo[d]thiazol-2-yl))(tert-butoxycarbonyl)amino)acetate (8)

$^1\text{H}$ , 400 MHz,  $\text{CDCl}_3$

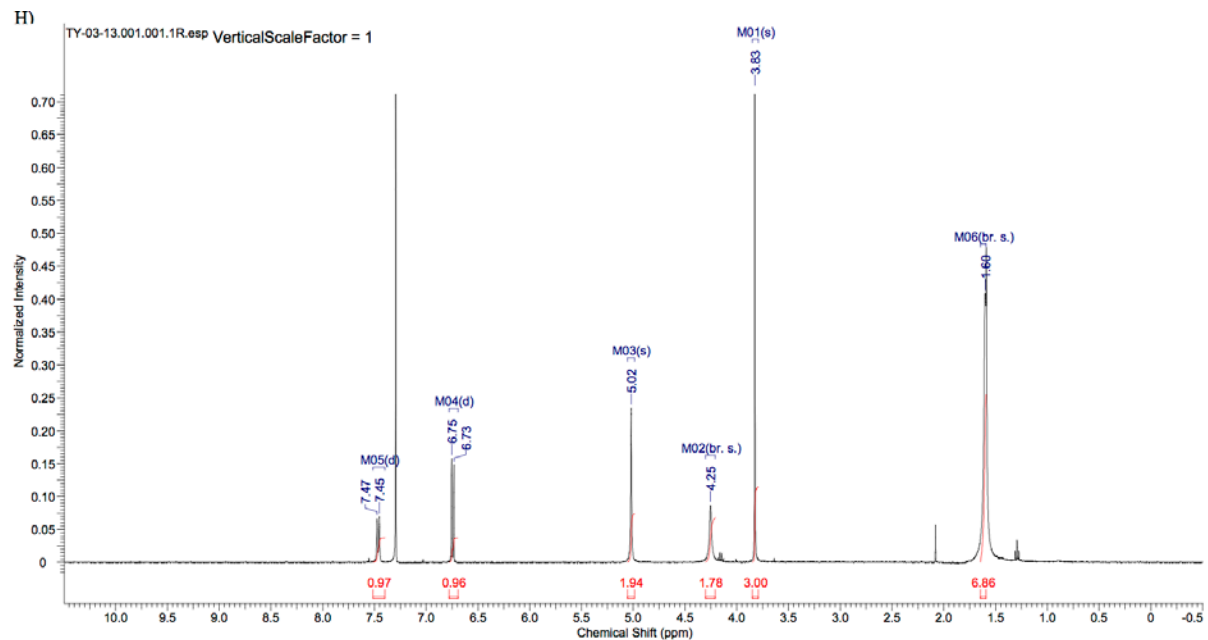

$^{13}\text{C}$ , 101 MHz,  $\text{CDCl}_3$

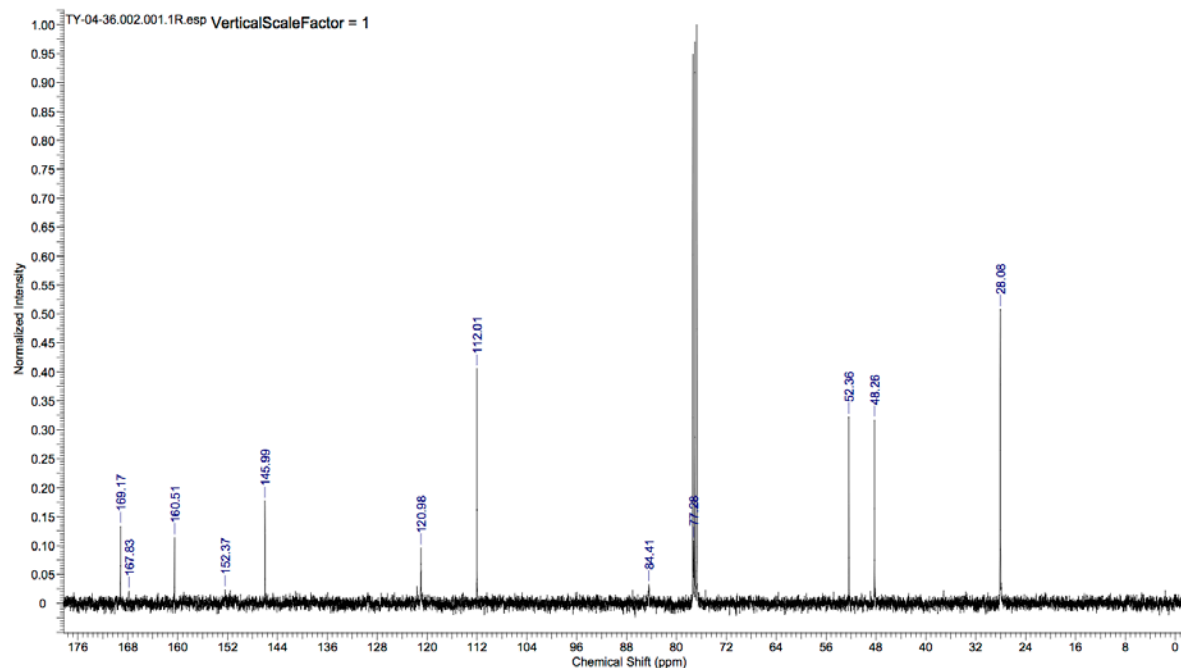

# Methyl 2-((5-amino-4-ethylbenzo[d]thiazol-2-yl)(*tert*-butoxycarbonyl)amino)acetate (11)

$^1\text{H}$ , 400 MHz,  $\text{CDCl}_3$

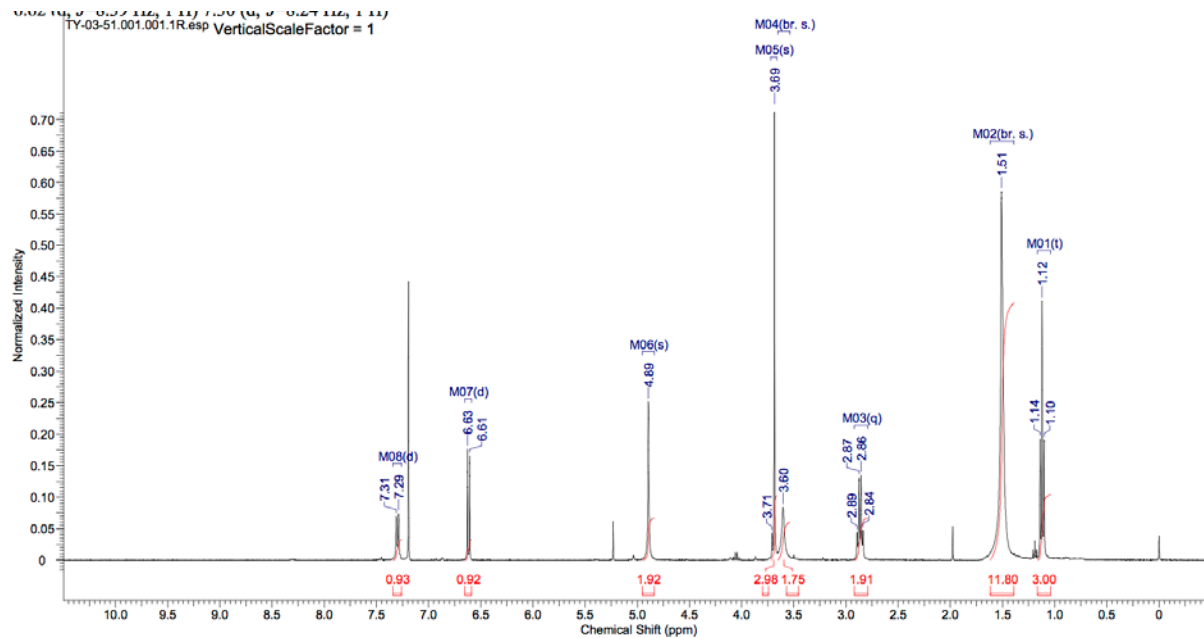

$^{13}\text{C}$ , 101 MHz,  $\text{CDCl}_3$

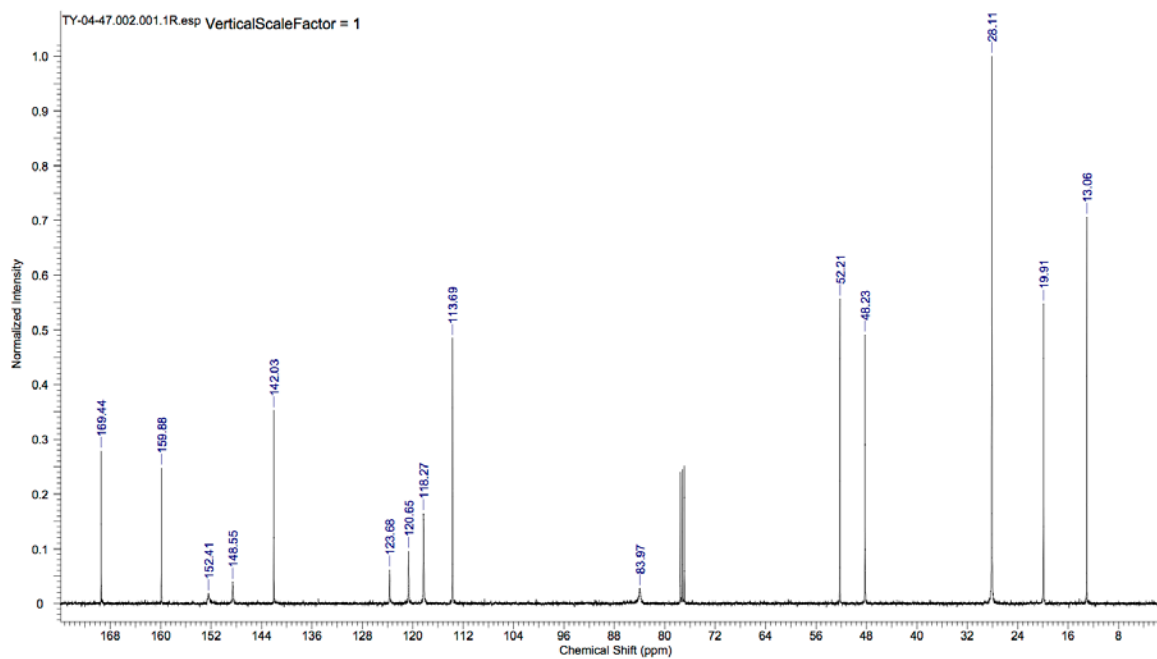

# Ethyl 2-(2-aminothiophen-3-yl)acetate (16)

$^1\text{H}$ , 600 MHz,  $\text{CDCl}_3$

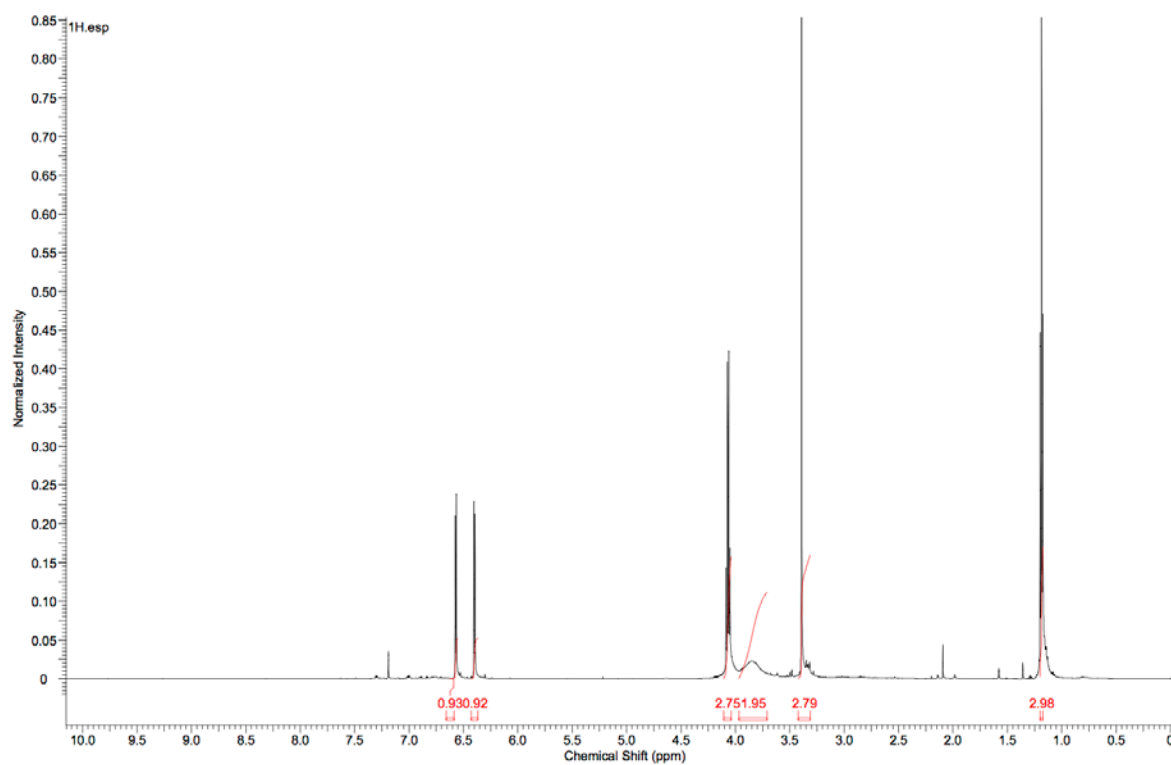

$^{13}\text{C}$ , 151 MHz,  $\text{CDCl}_3$

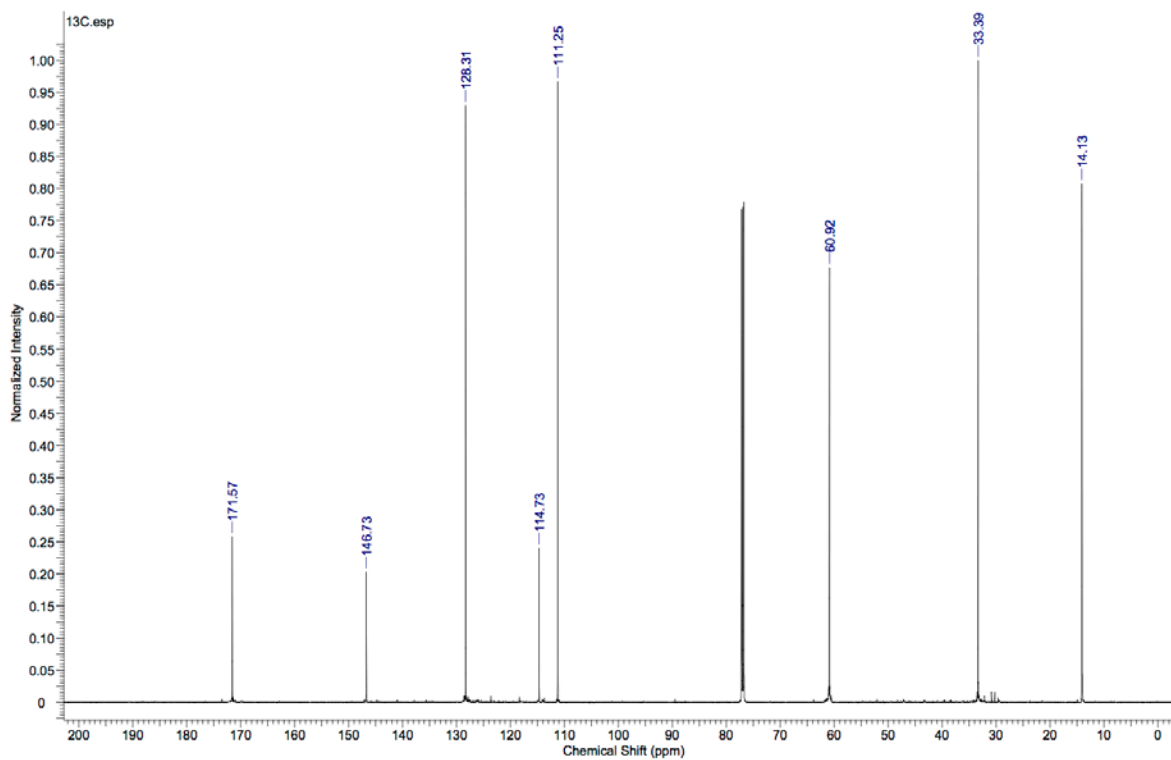



Ethyl 2-(2-(3-(2-((*tert*-butoxycarbonyl)(2-methoxy-2-oxoethyl)amino)-4-ethylbenzo[d]thiazol-5-yl)ureido)thiophen-3-yl)acetate (29)

$^1\text{H}$ , 400 MHz,  $\text{CDCl}_3$

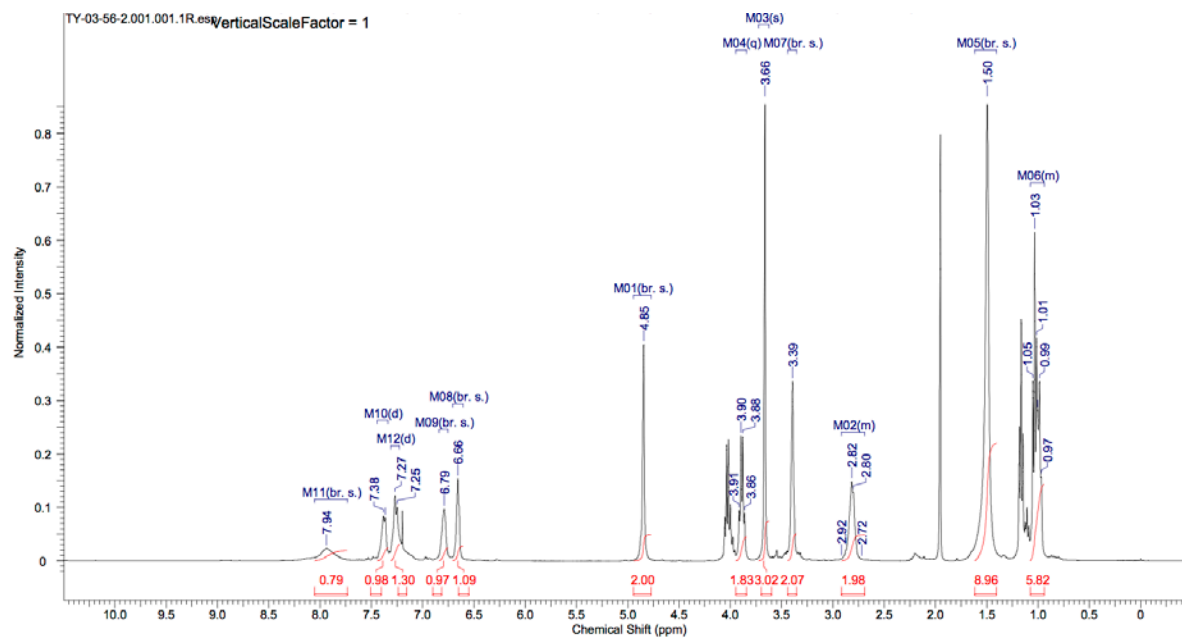

$^{13}\text{C}$ , 101 MHz,  $\text{CDCl}_3$

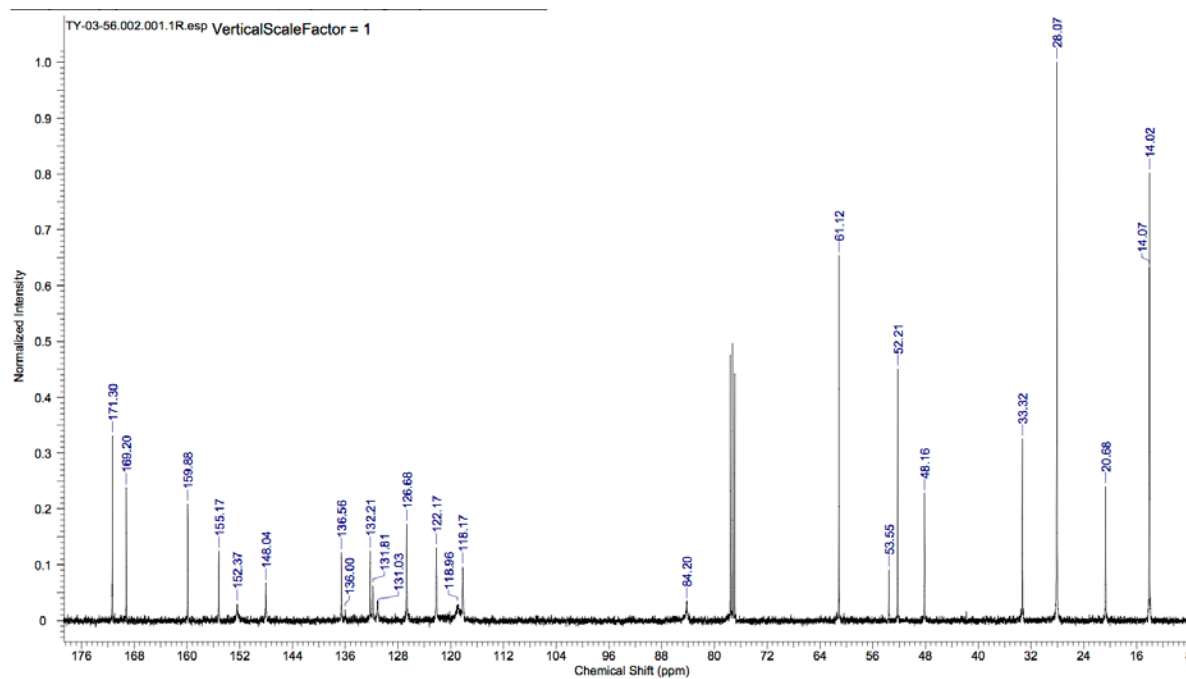

# 2-((*tert*-Butoxycarbonyl)(5-(3-(3-(carboxymethyl)thiophen-2-yl)ureido)-4-ethylbenzo[d]thiazol-2-yl)amino)acetic acid (21)

$^1\text{H}$ , 400 MHz,  $\text{d}_6\text{-DMSO}$

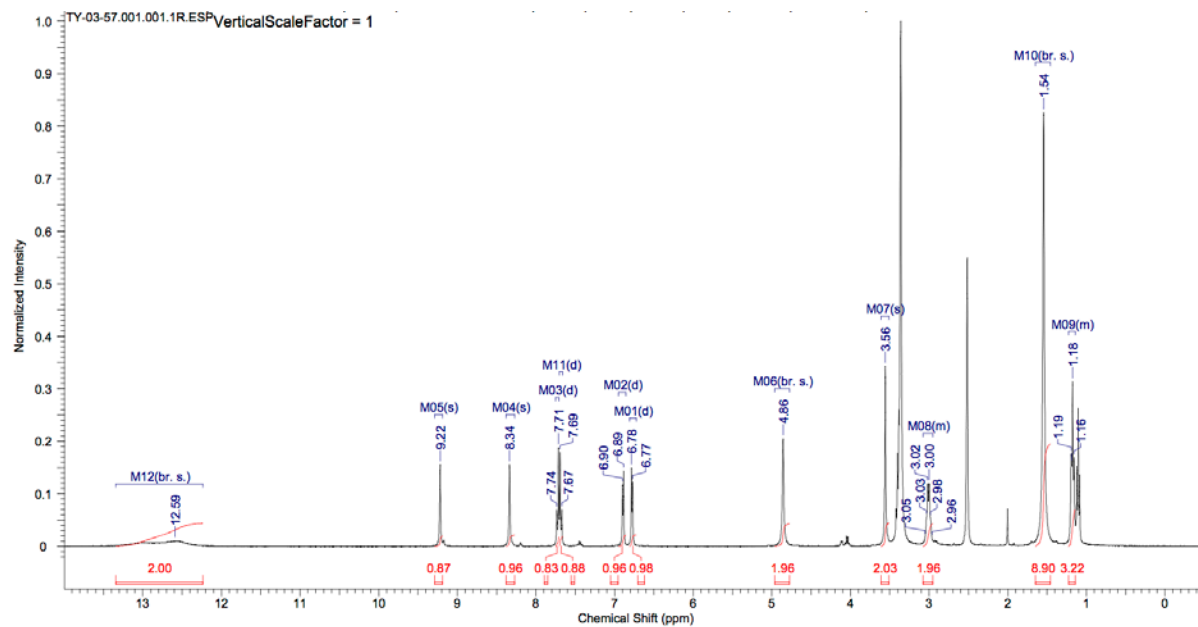

$^{13}\text{C}$ , 101 MHz,  $\text{d}_6\text{-DMSO}$

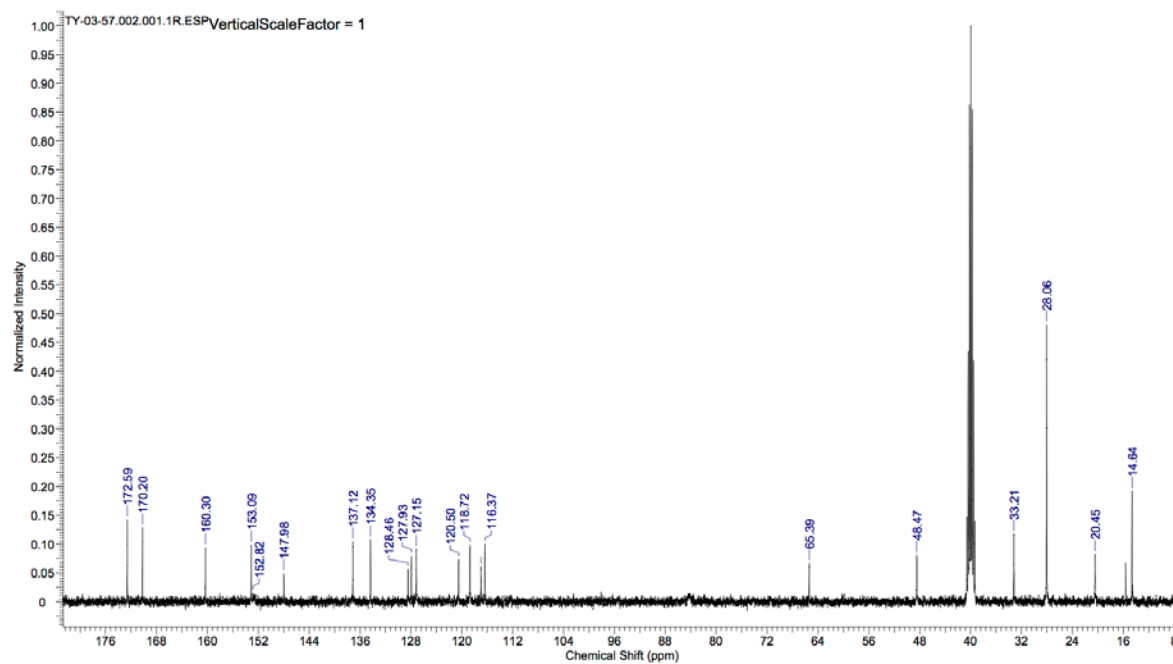

# Methyl 2-((5-amino-4-propylbenzo[d]thiazol-2-yl)(*tert*-butoxycarbonyl)amino)acetate (12)

$^1\text{H}$ , 400 MHz,  $\text{CDCl}_3$

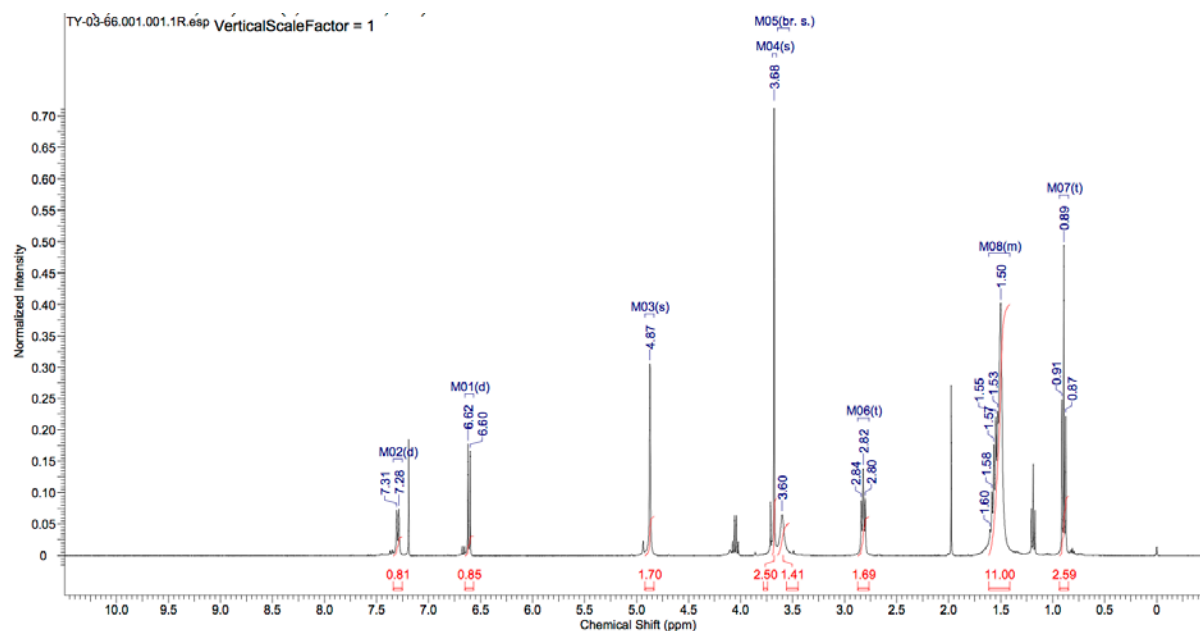

$^{13}\text{C}$ , 101 MHz,  $\text{CDCl}_3$

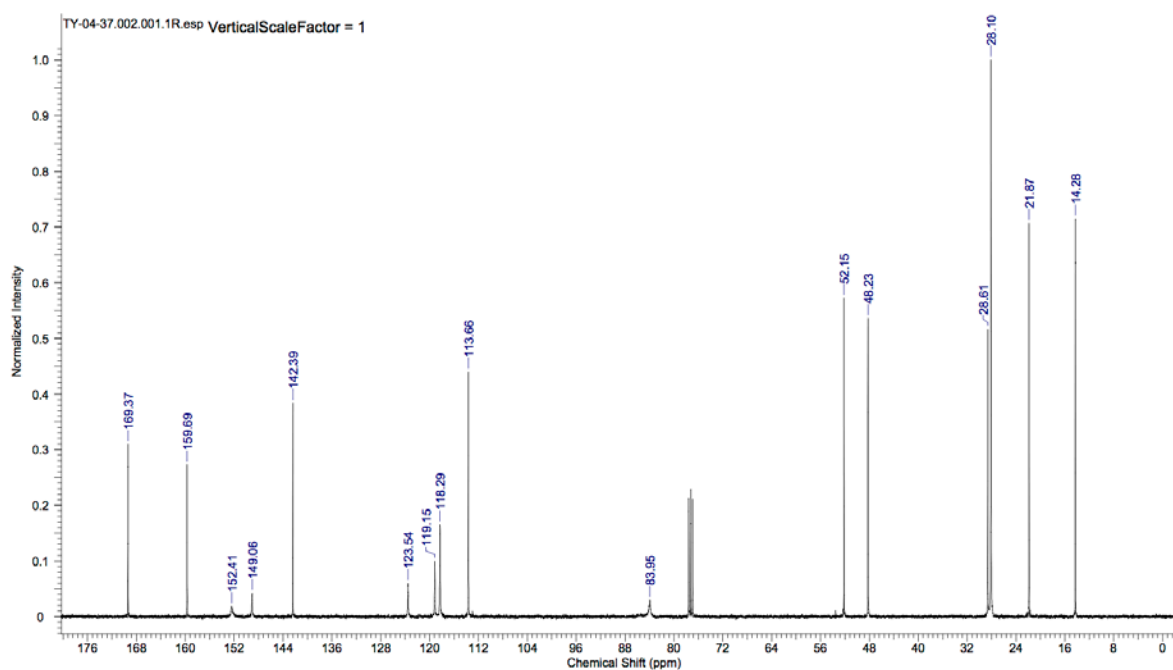

**Ethyl 2-(2-(3-(2-((*tert*-butoxycarbonyl)(2-methoxy-2-oxoethyl)amino)-4-propylbenzo[d]thiazol-5-yl)ureido)thiophen-3-yl)acetate (33)**

<sup>1</sup>H, 400 MHz, CDCl<sub>3</sub>

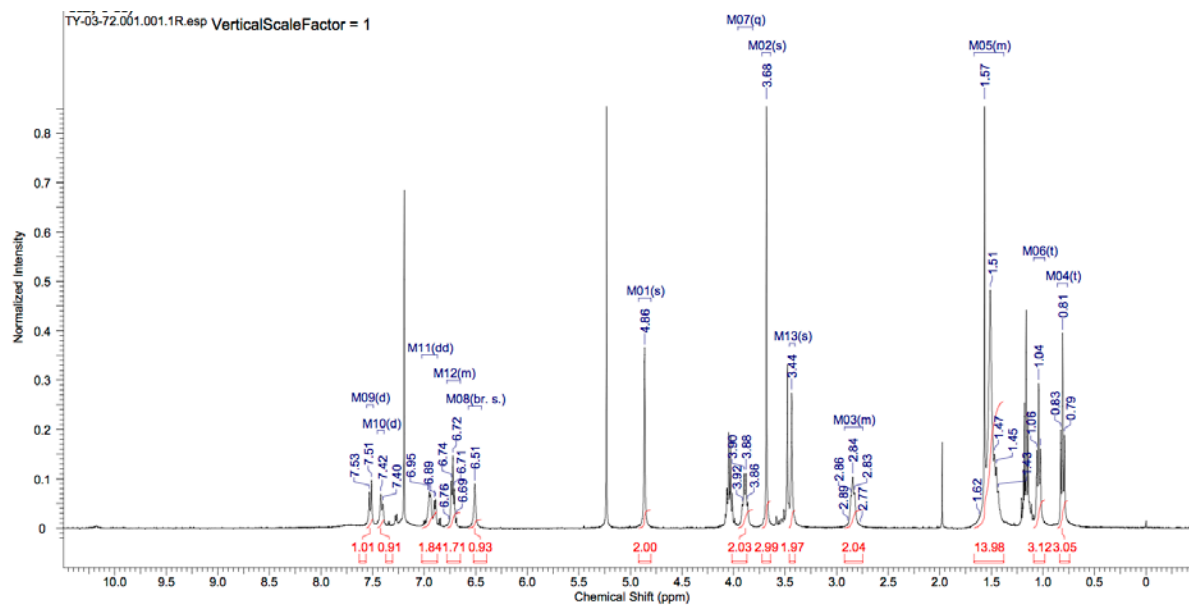

<sup>13</sup>C, 101 MHz, CDCl<sub>3</sub>

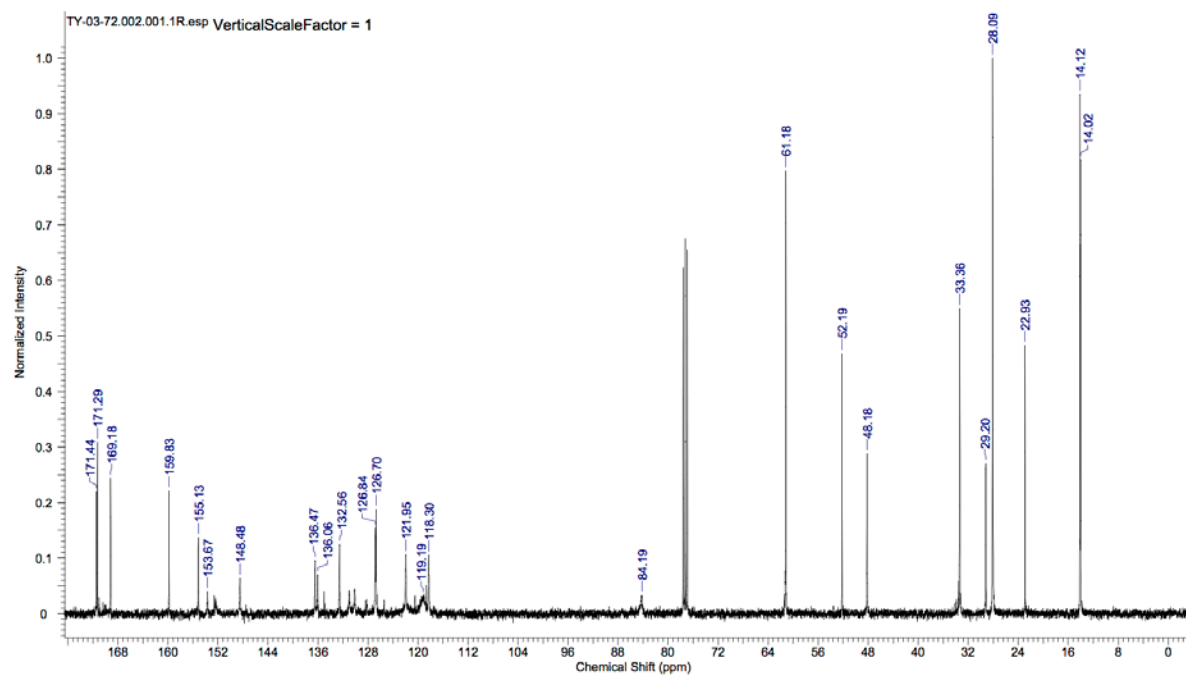

# 2-((*tert*-Butoxycarbonyl)(5-(3-(3-(carboxymethyl)thiophen-2-yl)ureido)-4-propylbenzo[*d*]thiazol-2-yl)amino)acetic acid (20)

$^1\text{H}$ , 400 MHz,  $\text{d}_6\text{-DMSO}$

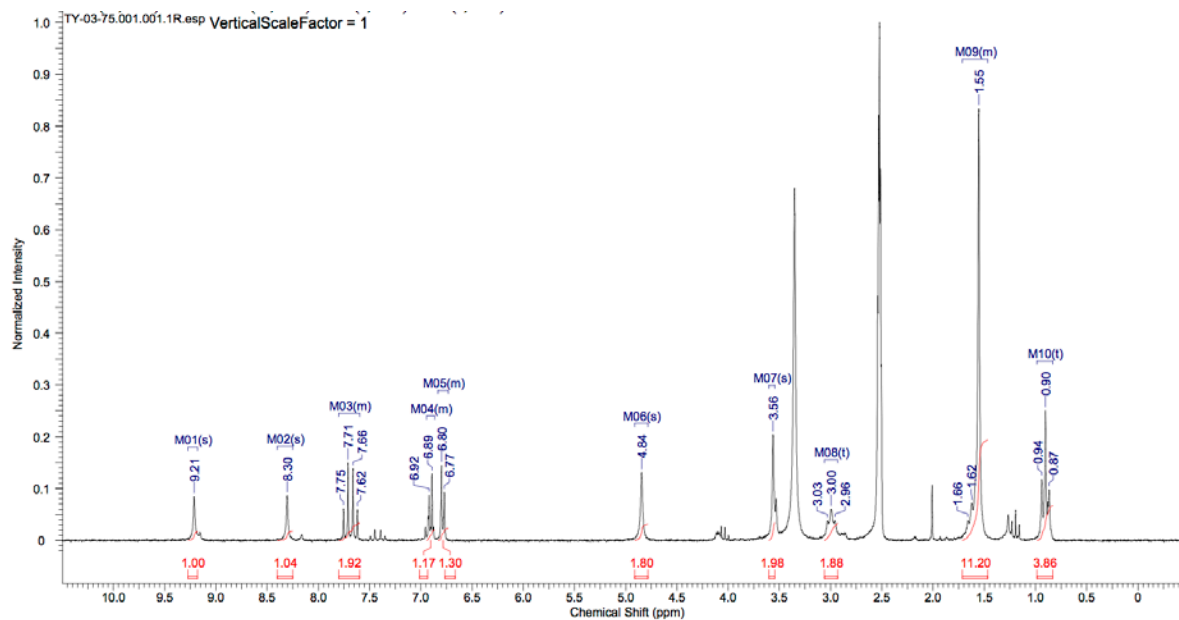

$^{13}\text{C}$ , 101 MHz,  $\text{d}_6\text{-DMSO}$

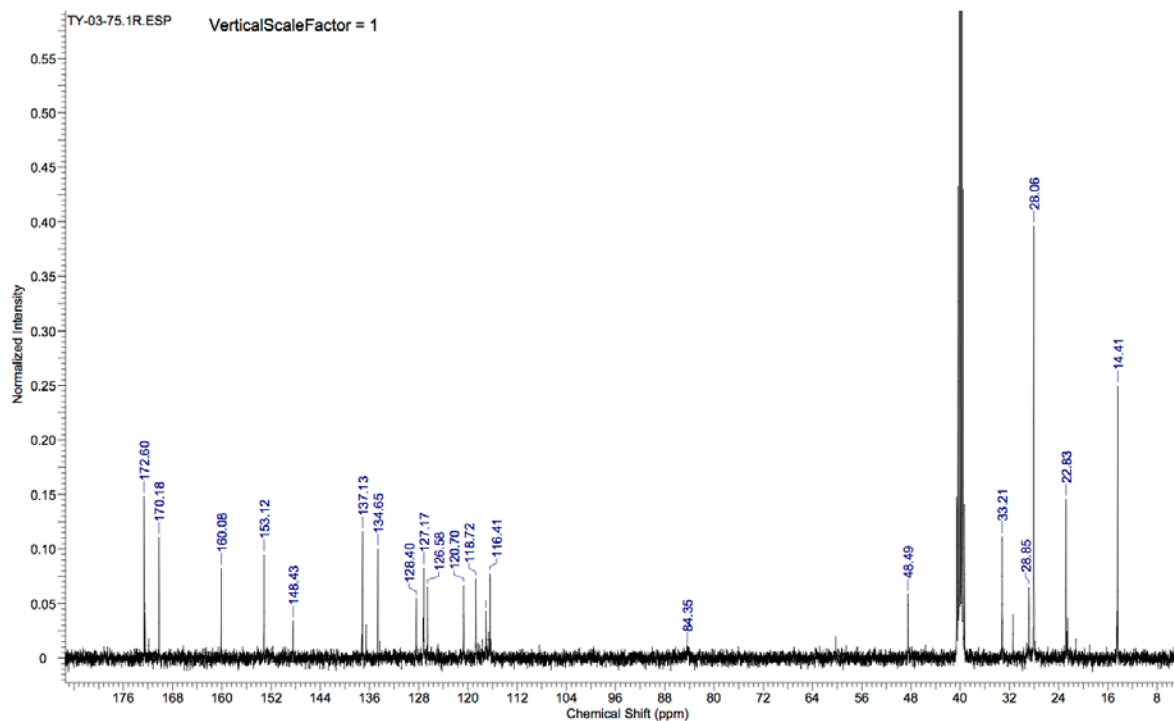

**tert-Butyl 3-((5-nitrobenzo[d]thiazol-2-yl)amino)propanoate (3)**

**$^1\text{H}$ , 400 MHz,  $\text{CDCl}_3$**

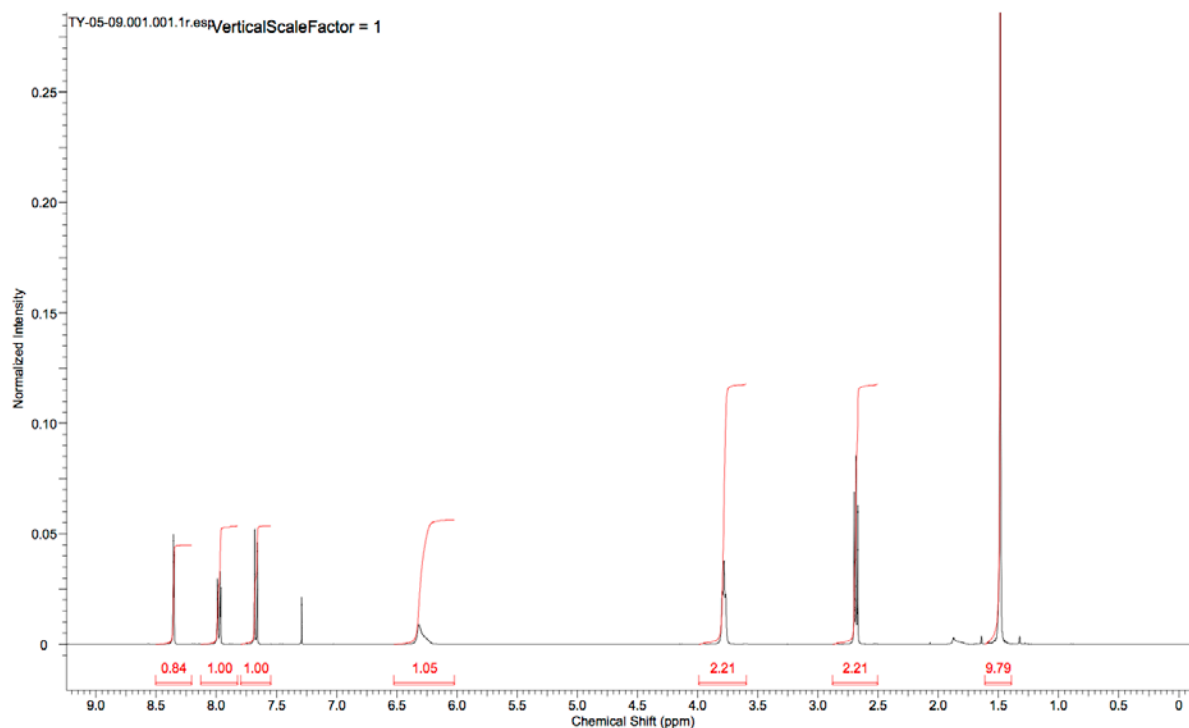

**$^{13}\text{C}$ , 101 MHz,  $\text{CDCl}_3$**

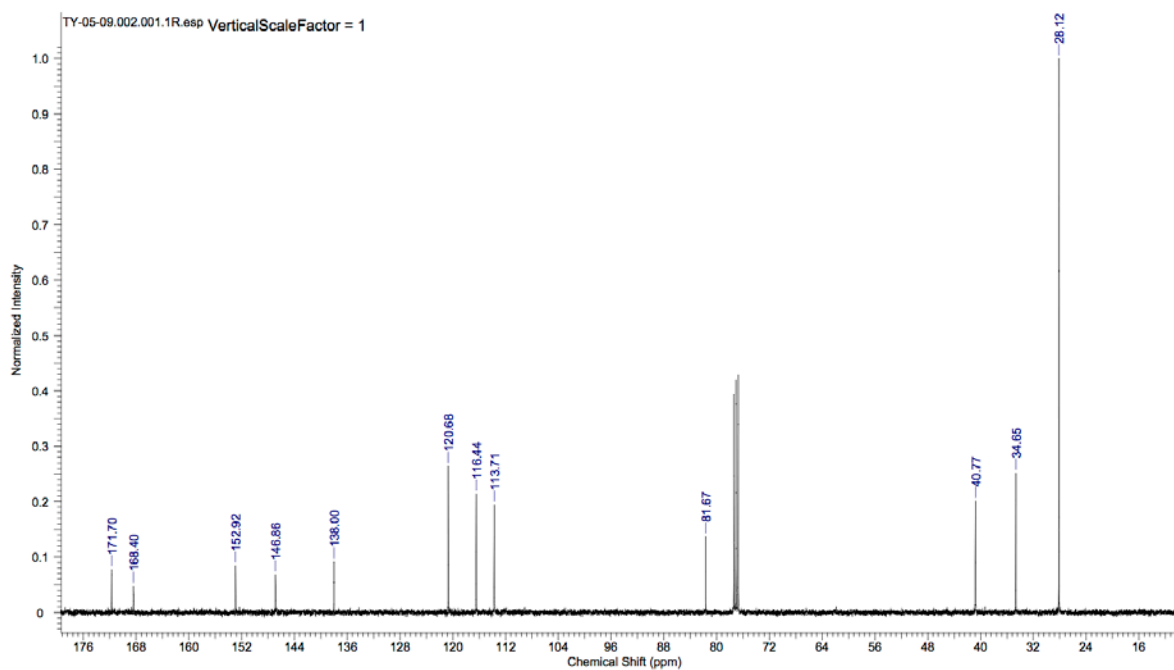

**tert-Butyl 3-((ethoxycarbonyl)(5-nitrobenzo[d]thiazol-2-yl)amino)propanoate (6)**

**$^1\text{H}$ , 400 MHz,  $\text{CDCl}_3$**

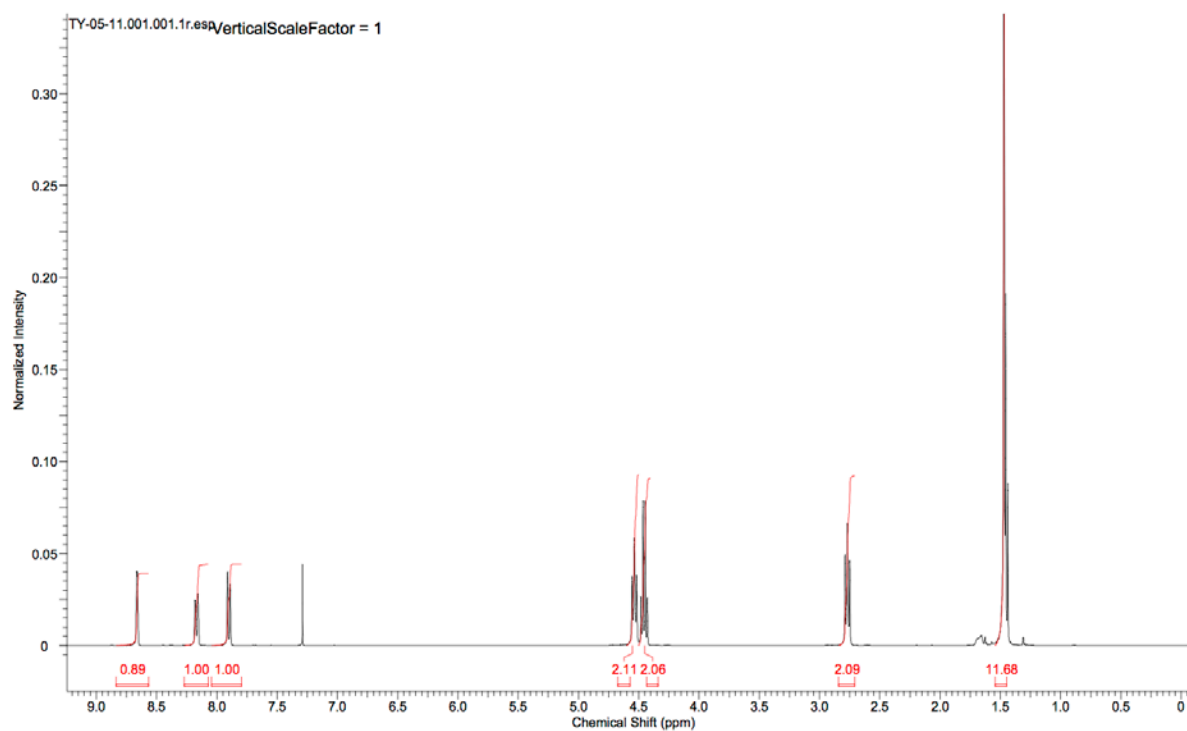

**$^{13}\text{C}$ , 101 MHz,  $\text{CDCl}_3$**

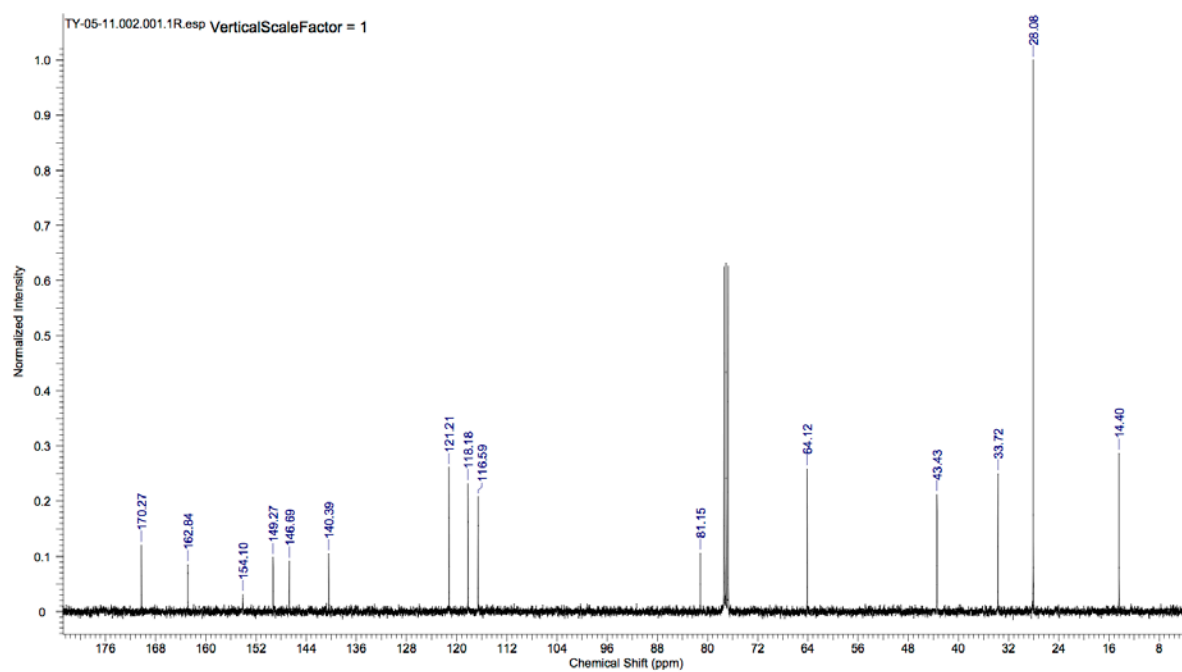

***tert*-Butyl 3-((5-aminobenzo[d]thiazol-2-yl)(ethoxycarbonyl)amino)propanoate (34)**

**$^1\text{H}$ , 400 MHz,  $\text{CDCl}_3$**

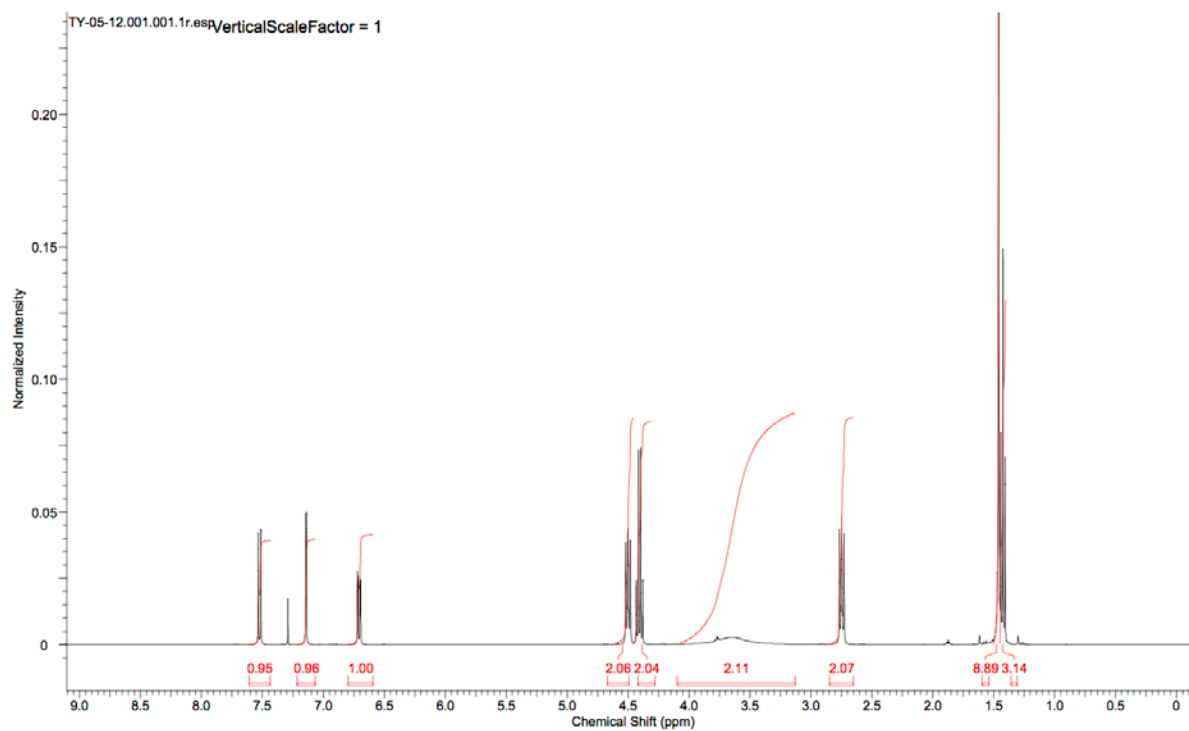

**$^{13}\text{C}$ , 101 MHz,  $\text{CDCl}_3$**

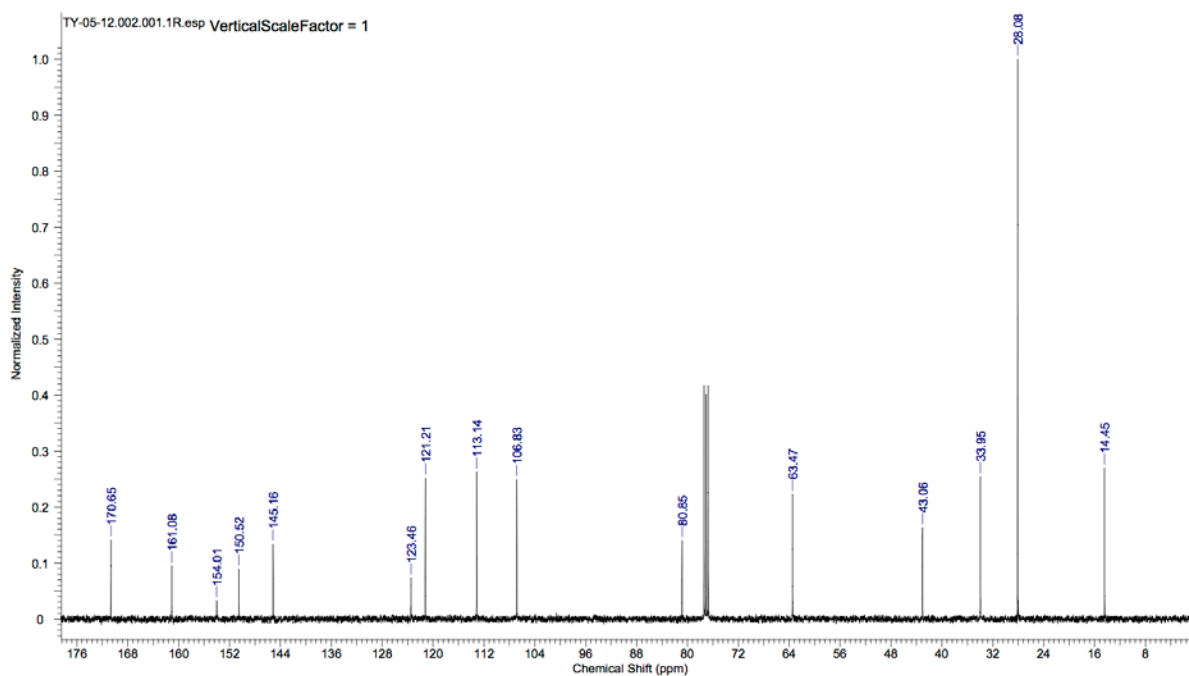



**tert-Butyl 3-((5-amino-4-iodobenzo[d]thiazol-2-yl)(ethoxycarbonyl)amino)propanoate (9)**

**$^1\text{H}$ , 400 MHz,  $\text{CDCl}_3$**

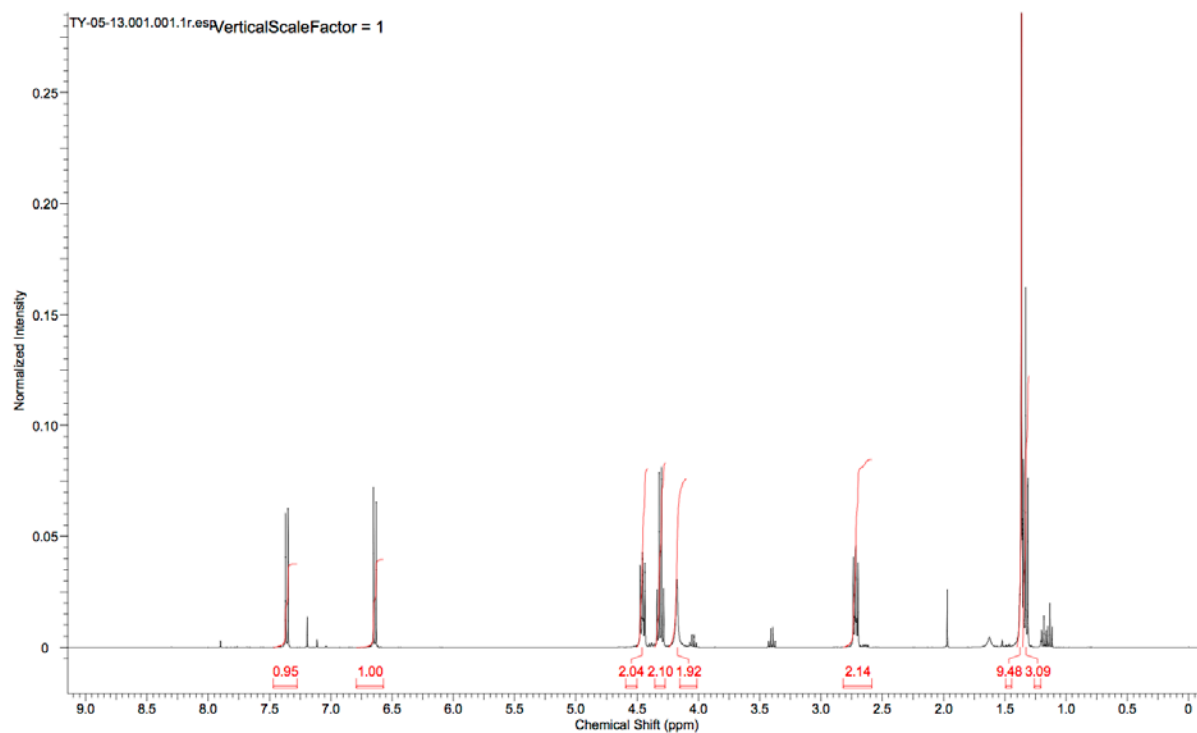

**$^{13}\text{C}$ , 101 MHz,  $\text{CDCl}_3$**

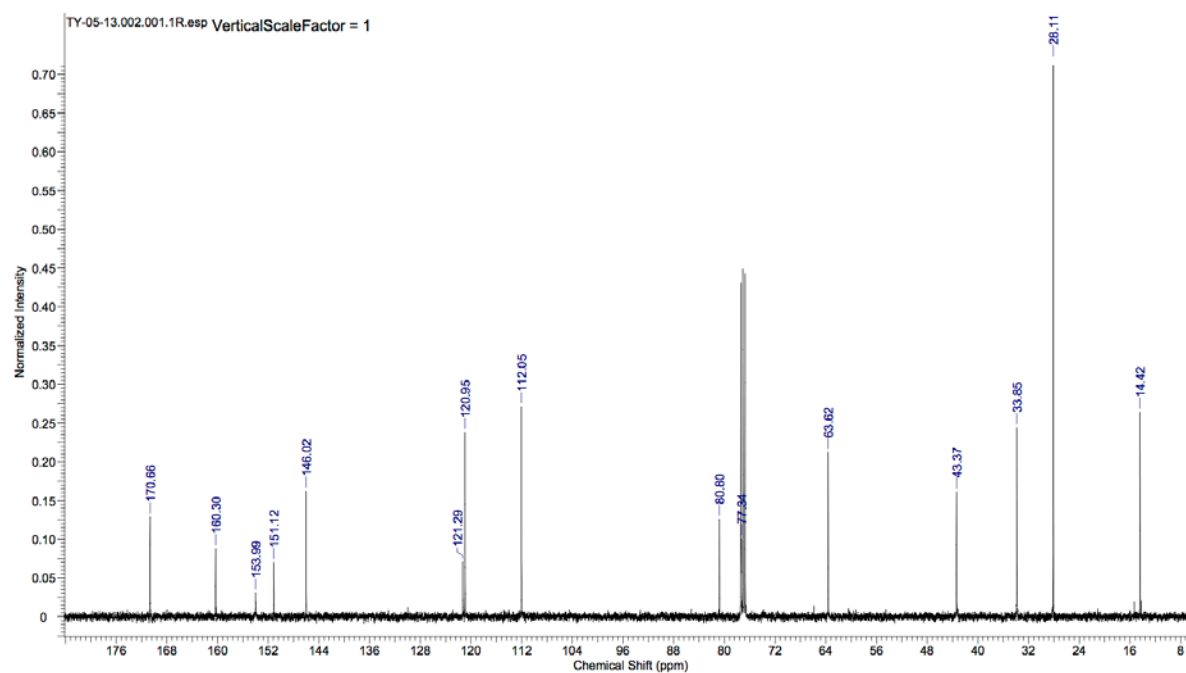

**tert-Butyl 3-((5-amino-4-propylbenzo[d]thiazol-2-yl)(ethoxycarbonyl)amino)propanoate (13)**

**$^1\text{H}$ , 400 MHz,  $\text{CDCl}_3$**

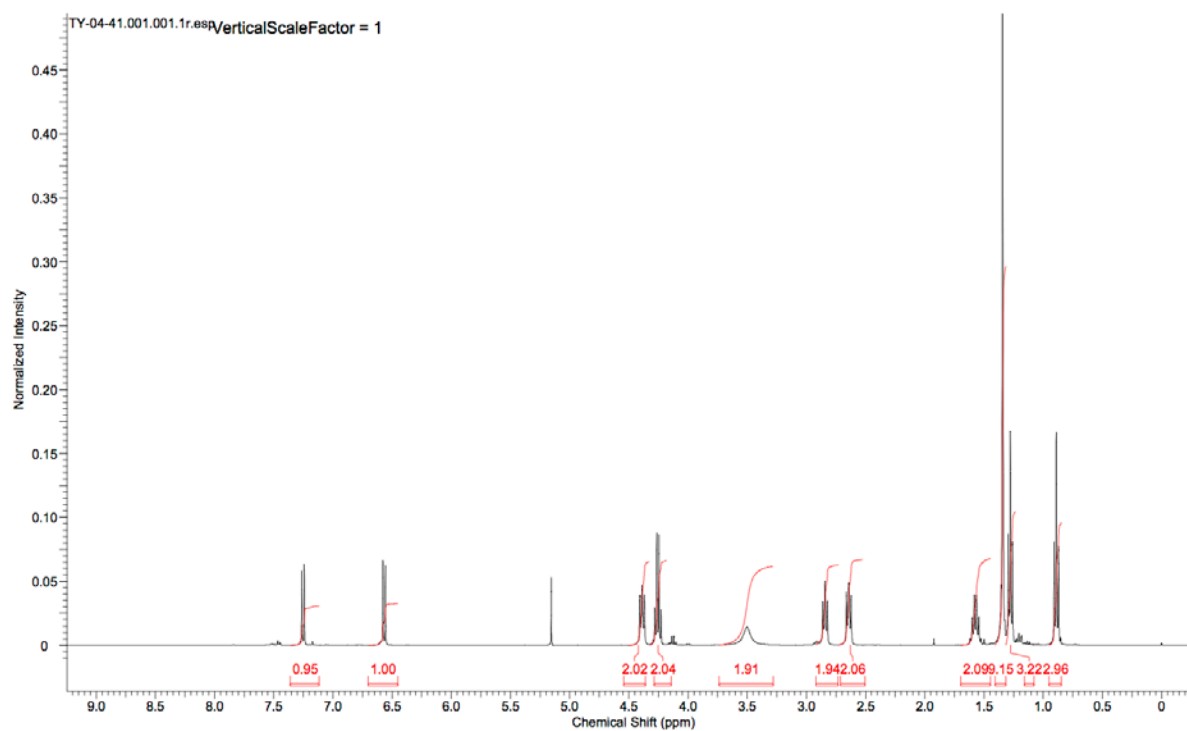

**$^{13}\text{C}$ , 101 MHz,  $\text{CDCl}_3$**

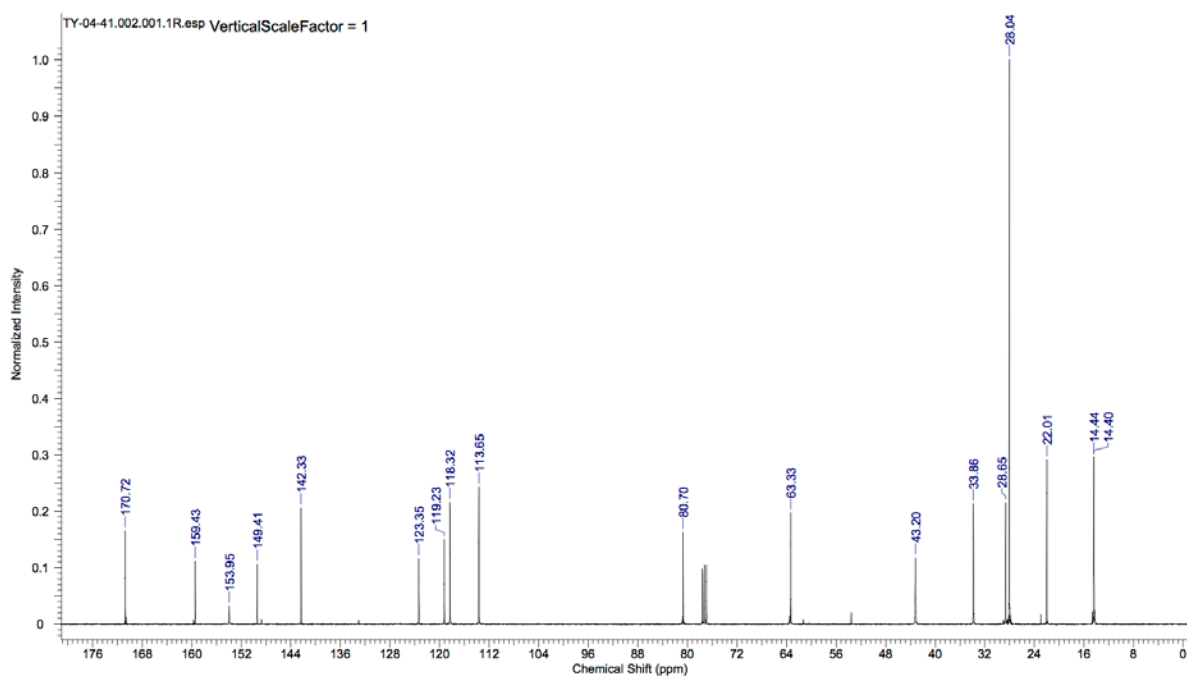

# *tert*-Butyl (3-bromothiophen-2-yl)carbamate (36)

$^1\text{H}$ , 500 MHz,  $\text{CDCl}_3$

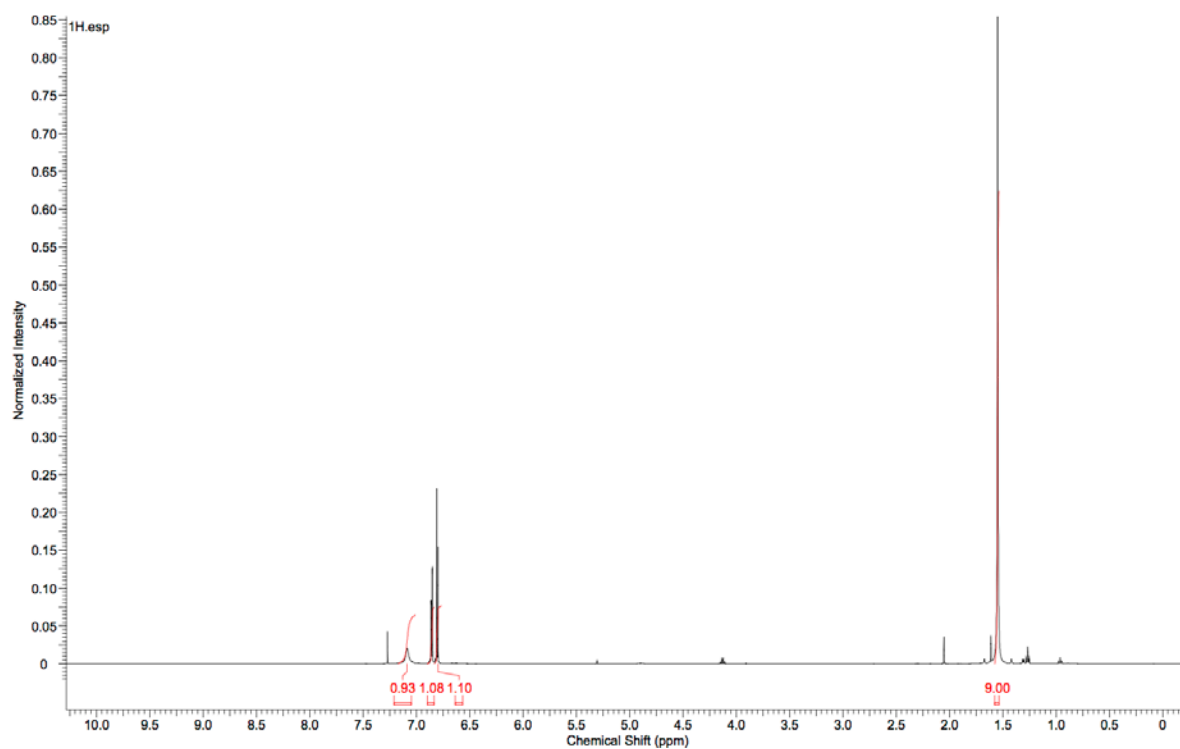

$^{13}\text{C}$ , 126 MHz,  $\text{CDCl}_3$

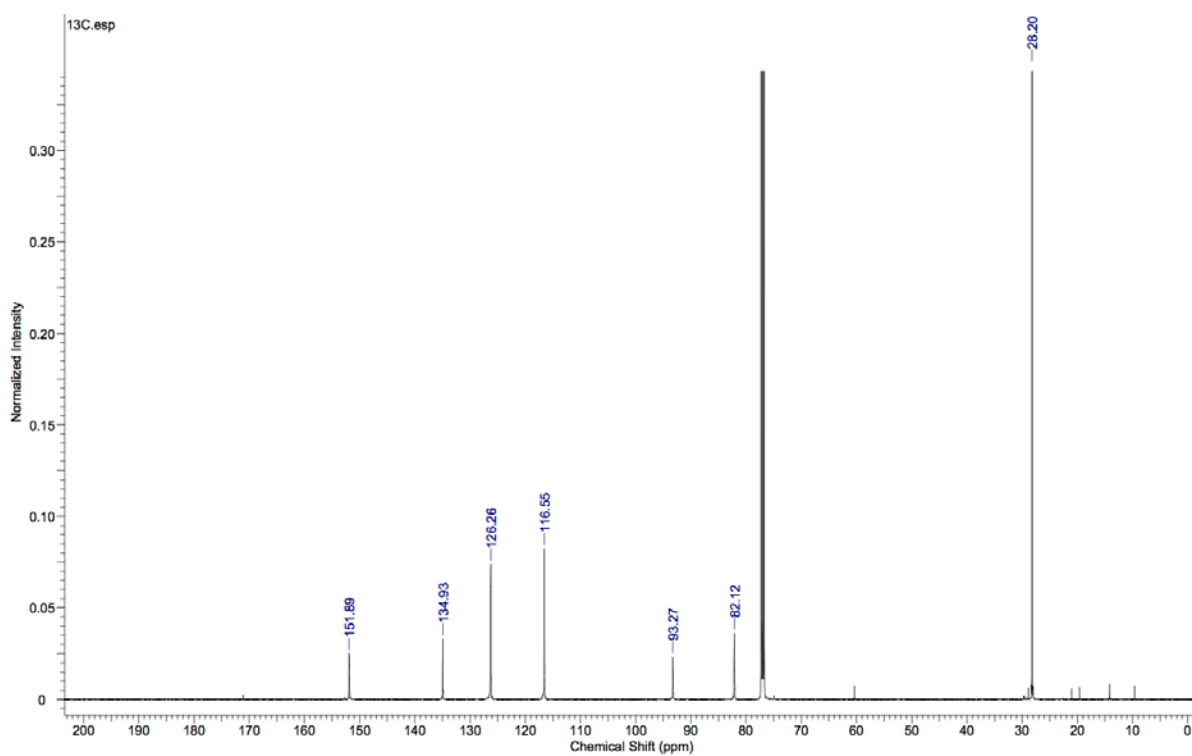

# Ethyl (E)-3-(2-((*tert*-butoxycarbonyl)amino)thiophen-3-yl)acrylate (37)

$^1\text{H}$ , 500 MHz,  $\text{CDCl}_3$

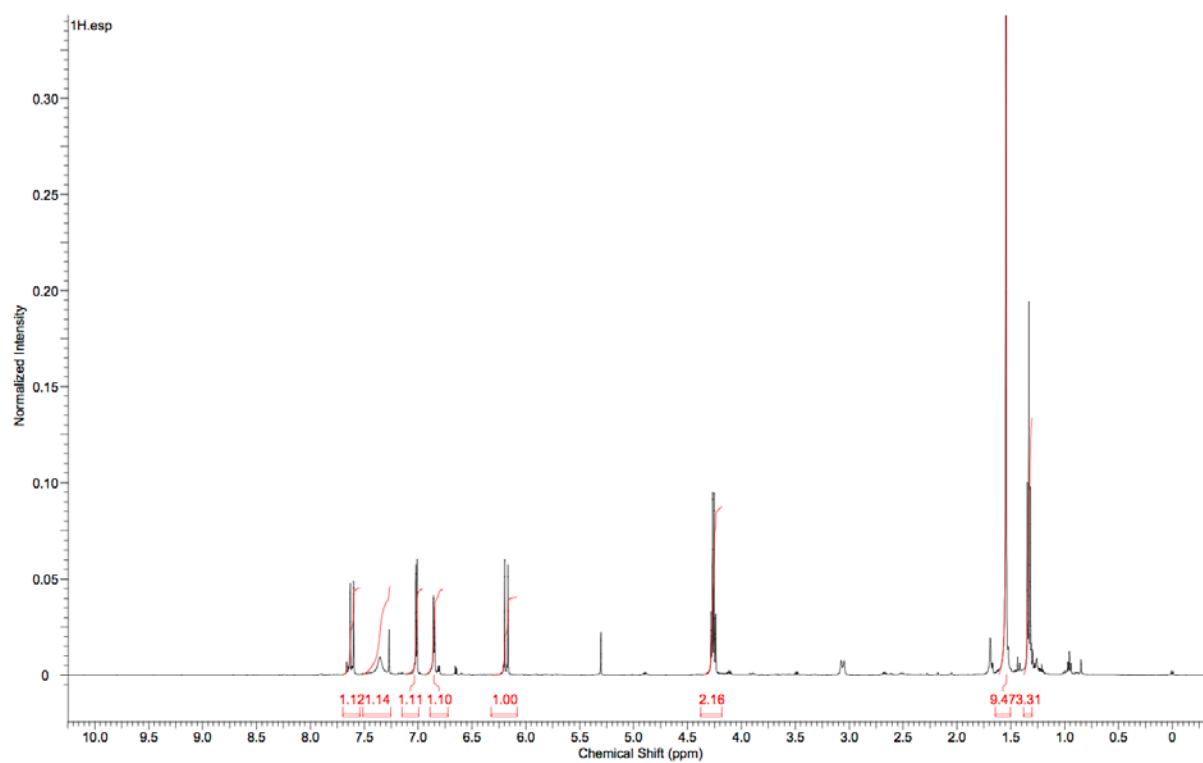

$^{13}\text{C}$ , 126 MHz,  $\text{CDCl}_3$

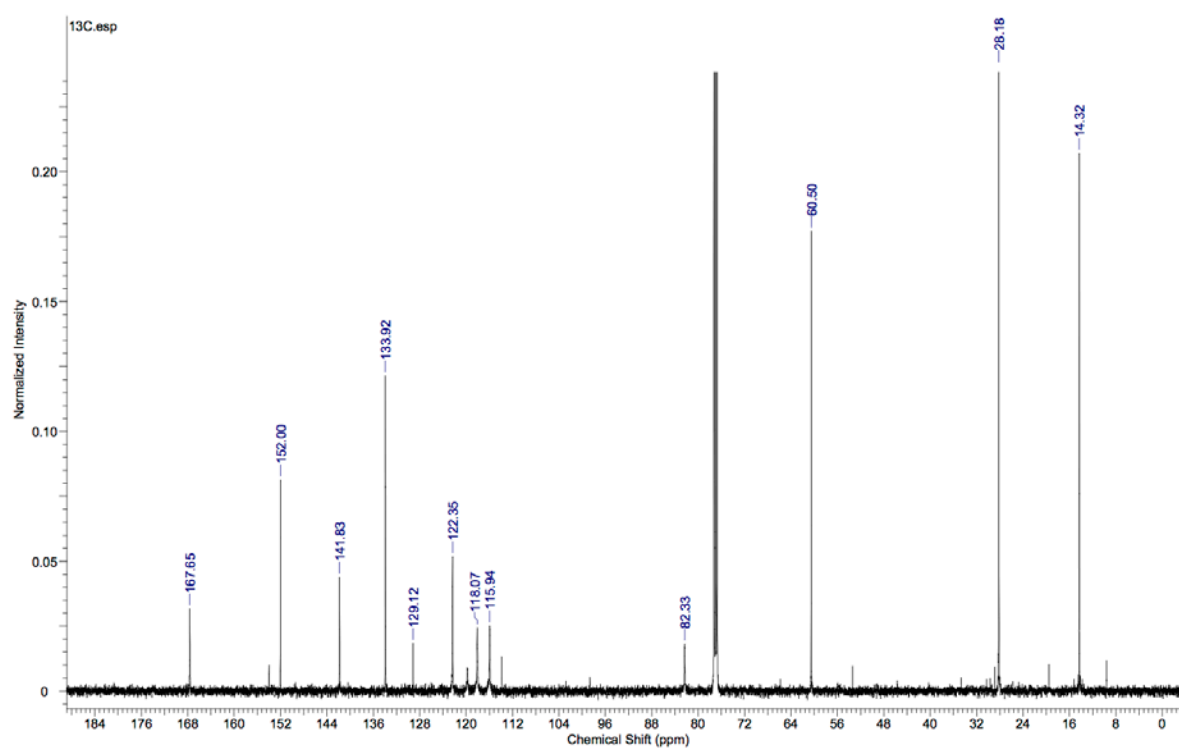

# Ethyl 3-(2-((*tert*-butoxycarbonyl)amino)thiophen-3-yl)propanoate (38)

$^1\text{H}$ , 400 MHz,  $\text{CDCl}_3$

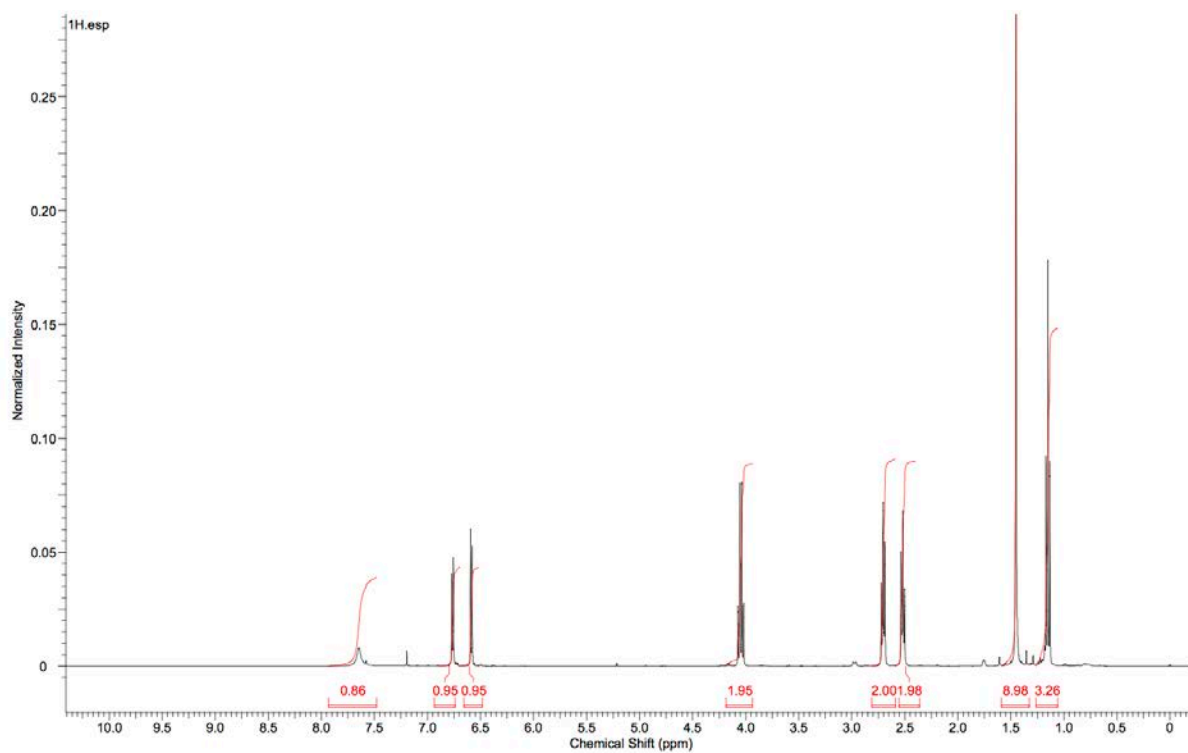

$^{13}\text{C}$ , 101 MHz,  $\text{CDCl}_3$

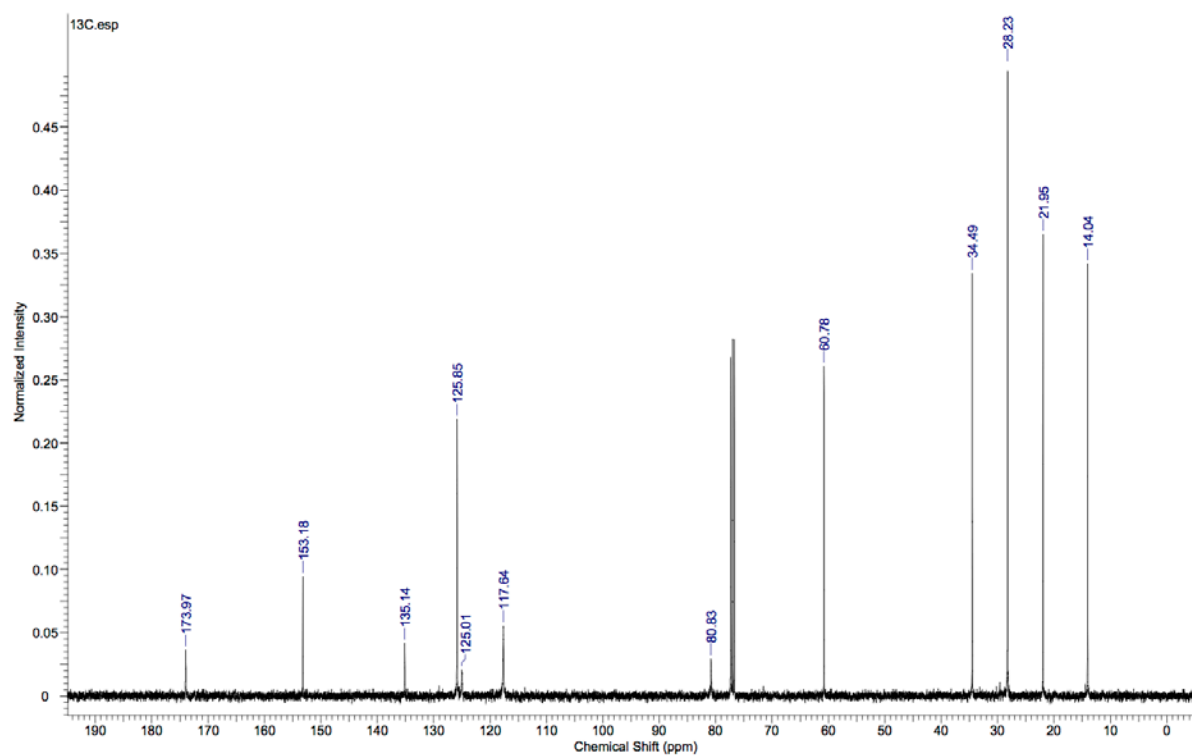

# Ethyl 3-(2-aminothiophen-3-yl)propanoate (17)

$^1\text{H}$ , 400 MHz,  $\text{CDCl}_3$

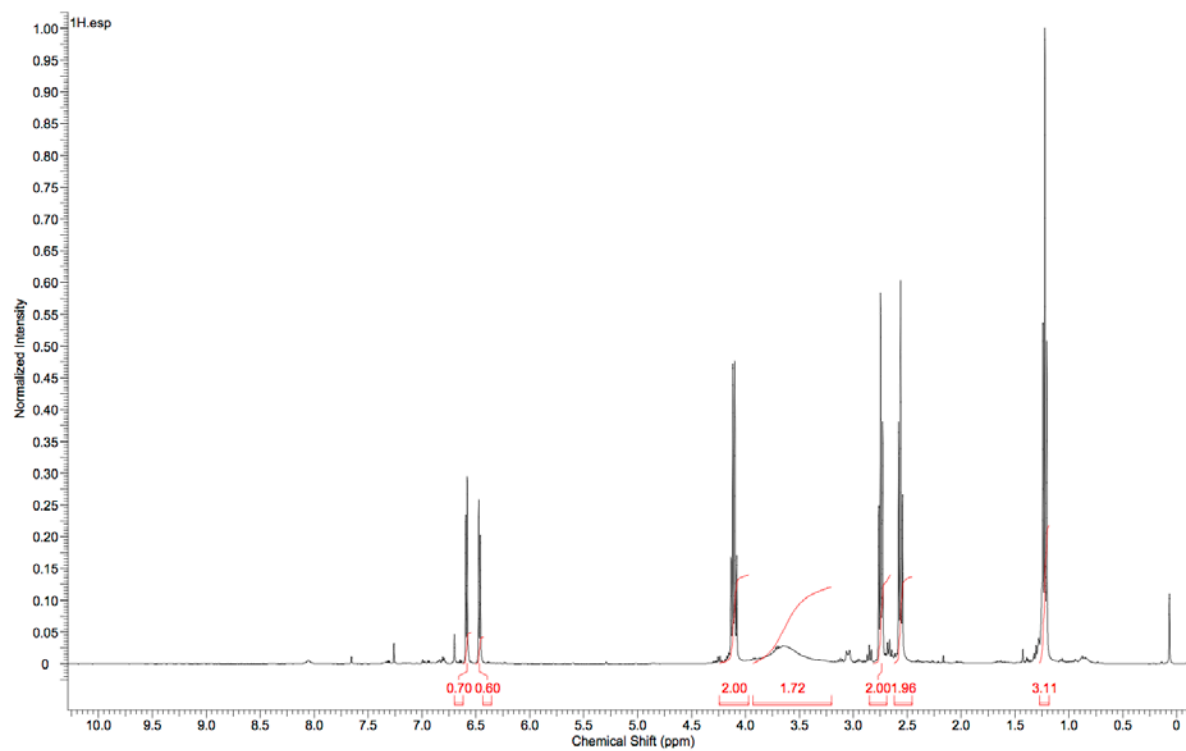

$^{13}\text{C}$ , 101 MHz,  $\text{CDCl}_3$

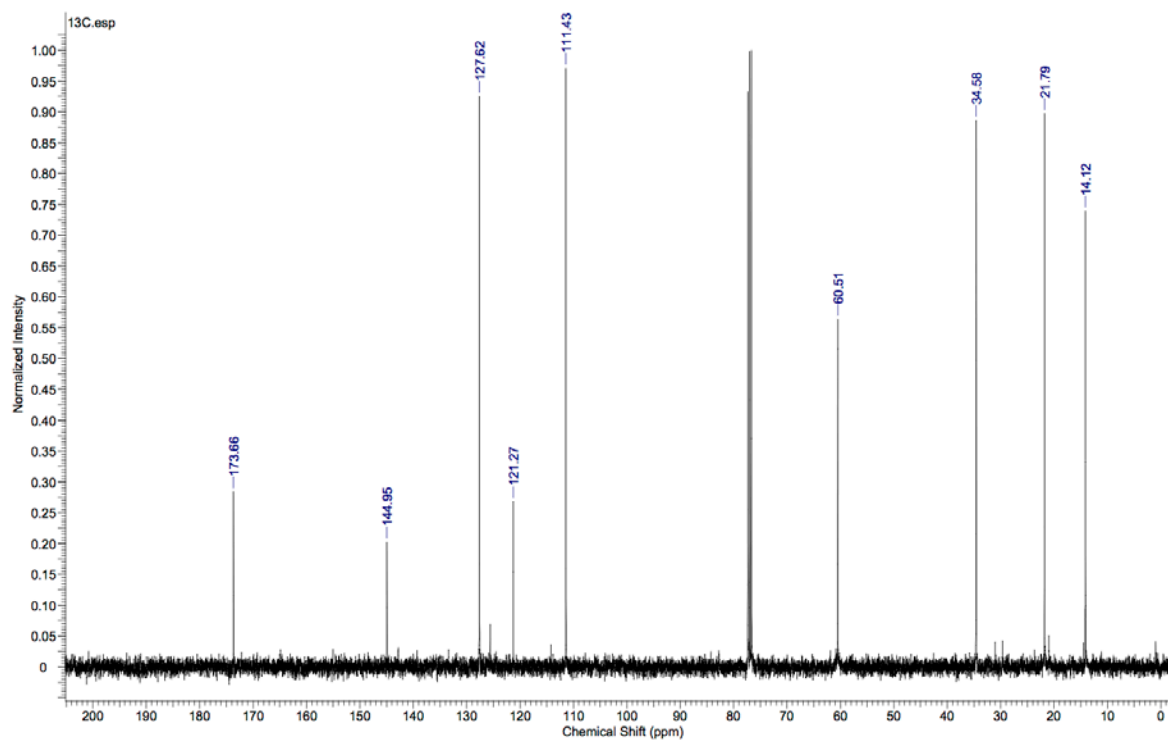

### 3-(2-((*tert*-Butoxycarbonyl)amino)thiophen-3-yl)propanoic acid (39)

$^1\text{H}$ , 600 MHz,  $\text{CDCl}_3$

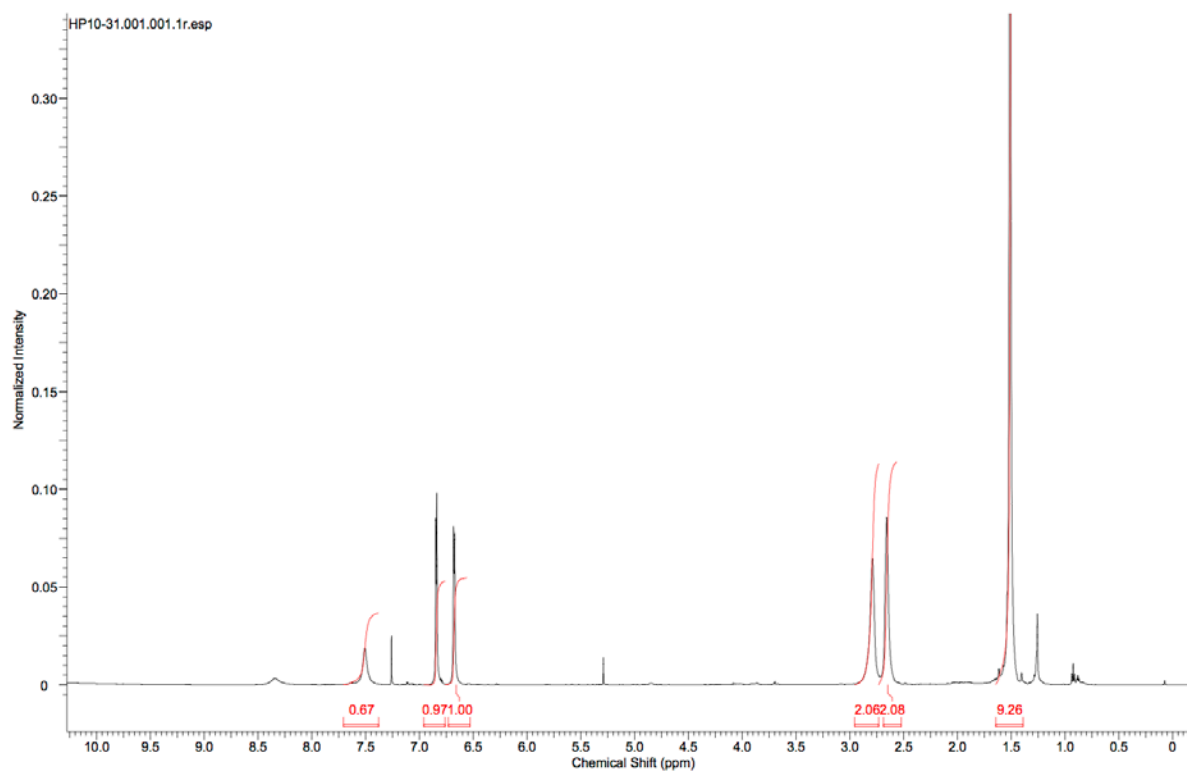

$^{13}\text{C}$ , 151 MHz,  $\text{CDCl}_3$

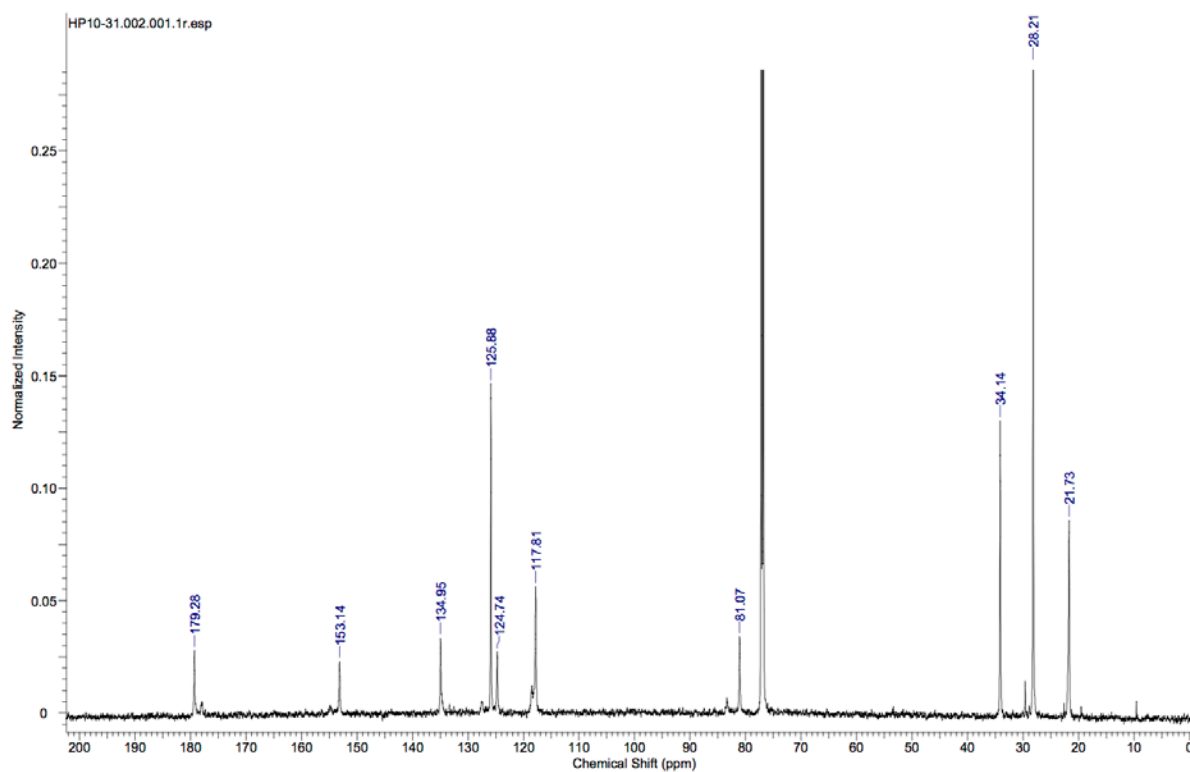

# Allyl 3-(2-((*tert*-butoxycarbonyl)amino)thiophen-3-yl)propanoate (40)

$^1\text{H}$ , 600 MHz,  $\text{CDCl}_3$

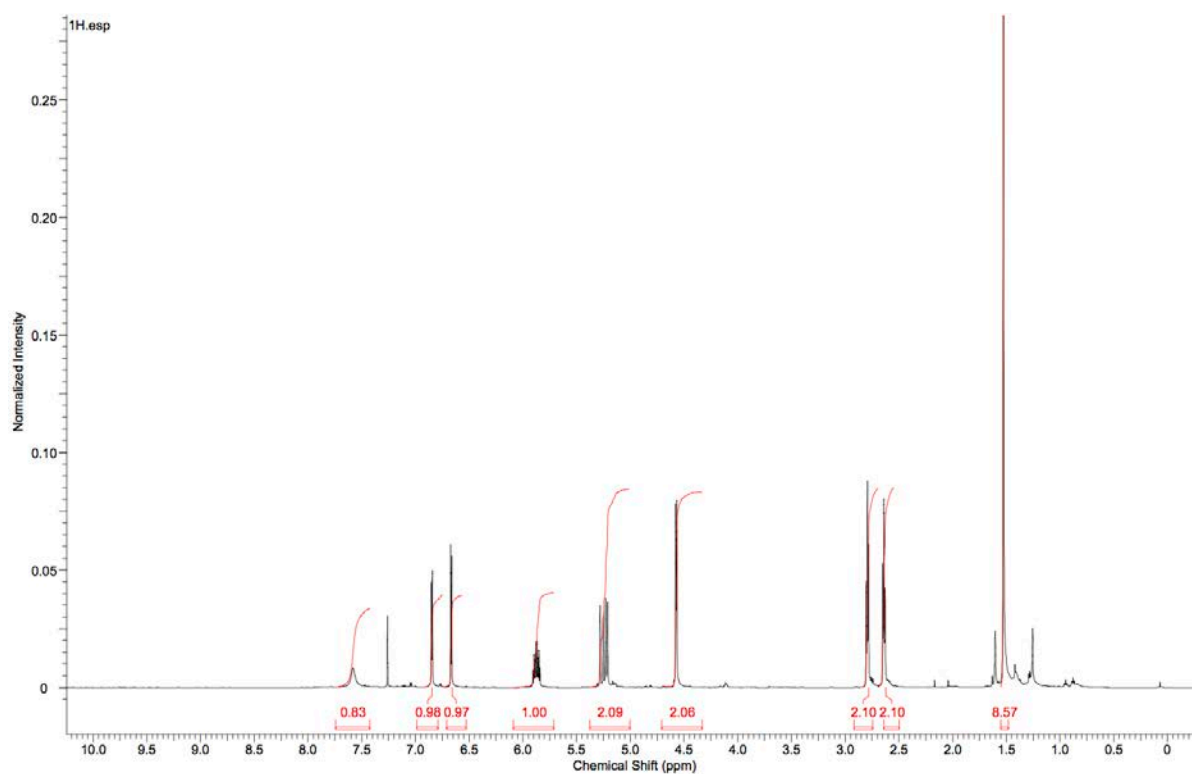

$^{13}\text{C}$ , 151 MHz,  $\text{CDCl}_3$

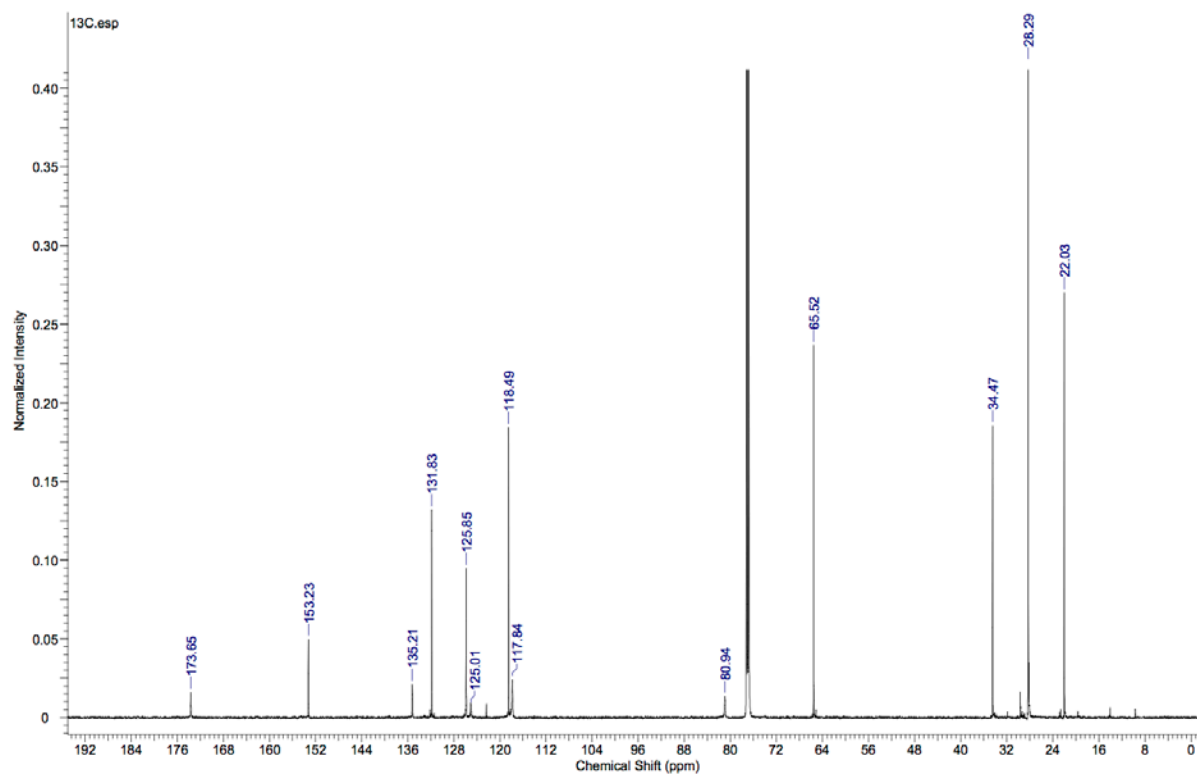



# Allyl 3-(2-aminothiophen-3-yl)propanoate (18)

$^1\text{H}$ , 600 MHz,  $\text{CDCl}_3$

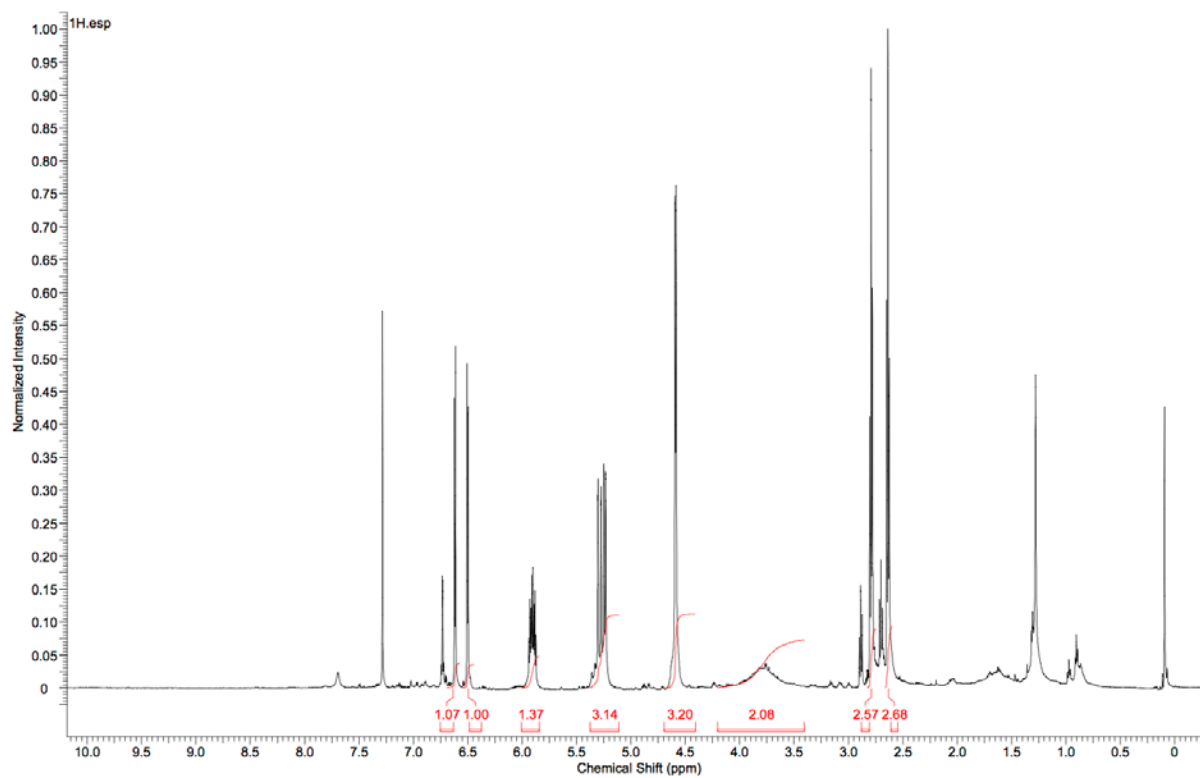

Allyl 3-(2-(3-(2-((3-(*tert*-butoxy)-3-oxopropyl)(ethoxycarbonyl)amino)-4-propylbenzo[d]thiazol-5-yl)ureido)thiophen-3-yl)propanoate (35)

$^1\text{H}$ , 400 MHz,  $\text{CDCl}_3$

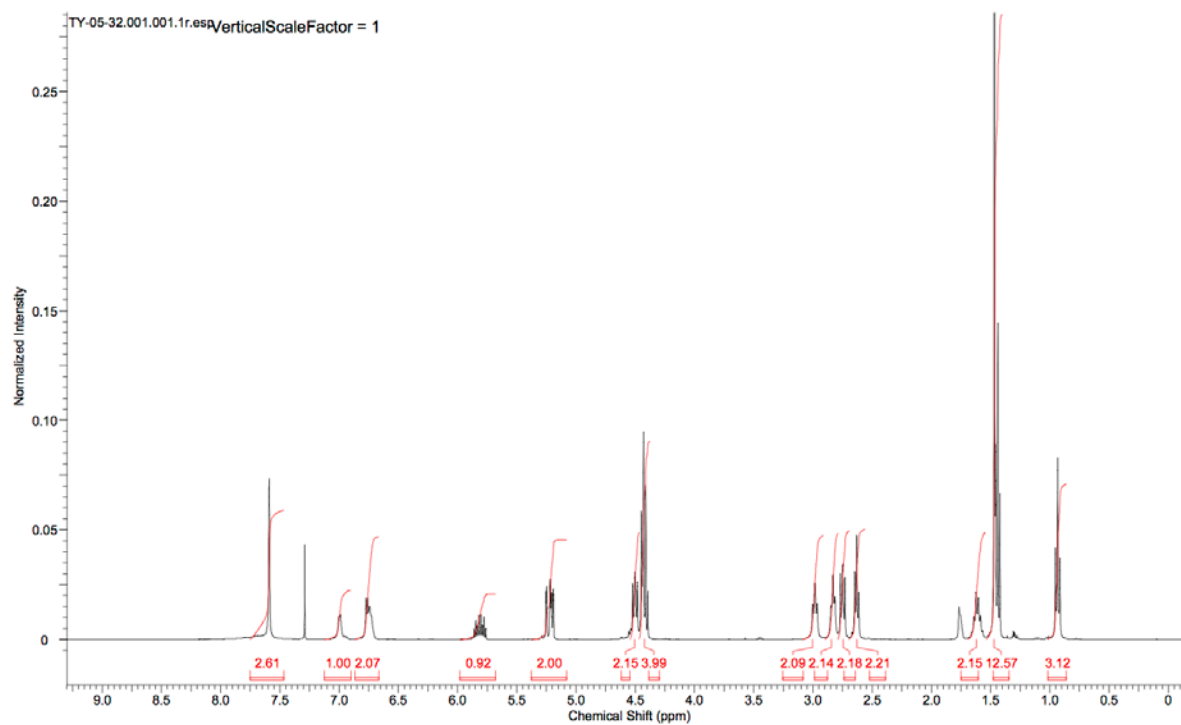

$^{13}\text{C}$ , 101 MHz,  $\text{CDCl}_3$

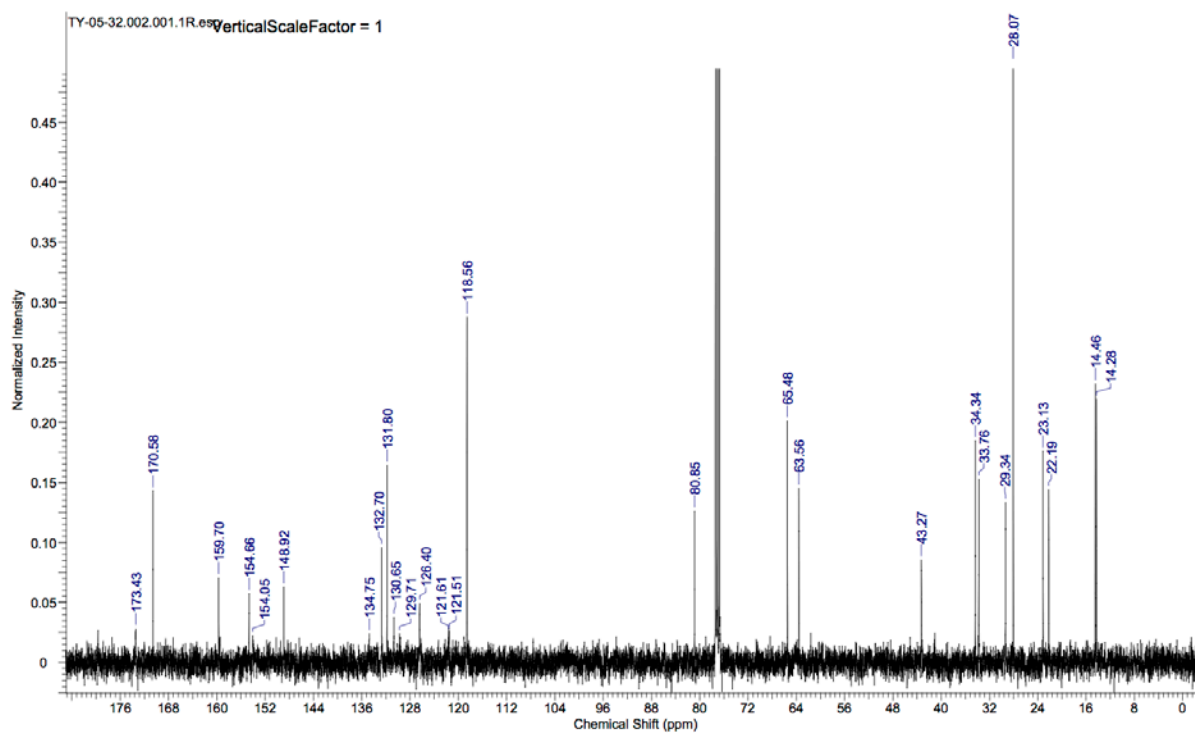

### 3-(2-(3-(2-((2-Carboxyethyl)(ethoxycarbonyl)amino)-4-propylbenzo[d]thiazol-5-yl)ureido)thiophen-3-yl)propanoic acid (22)

$^1\text{H}$ , 400 MHz,  $\text{CDCl}_3$

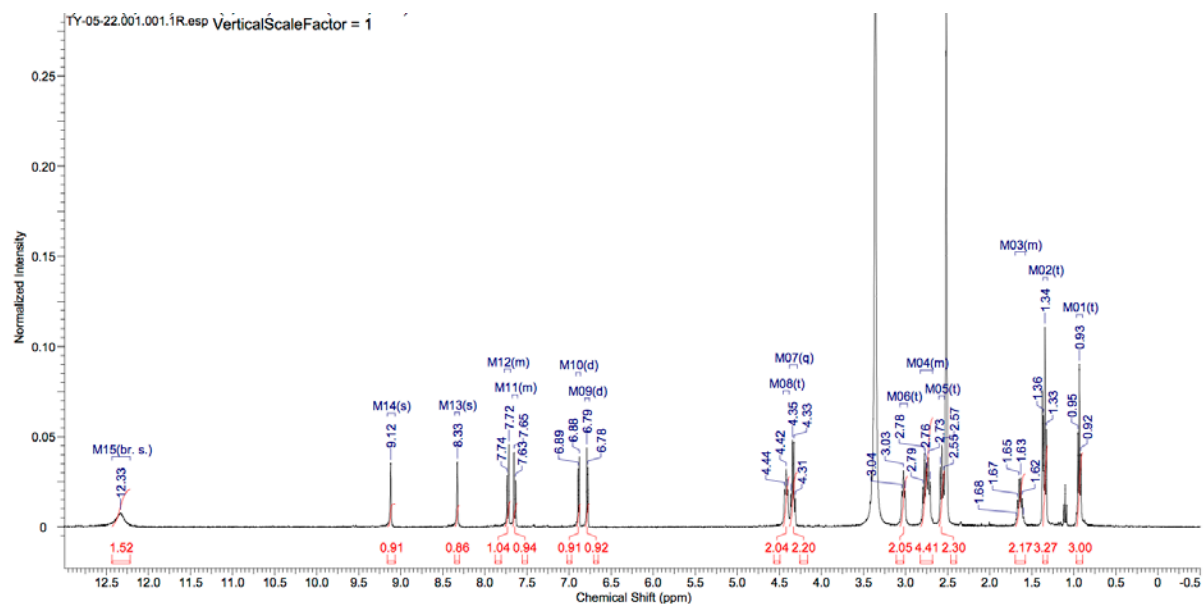

$^{13}\text{C}$ , 101 MHz,  $\text{CDCl}_3$

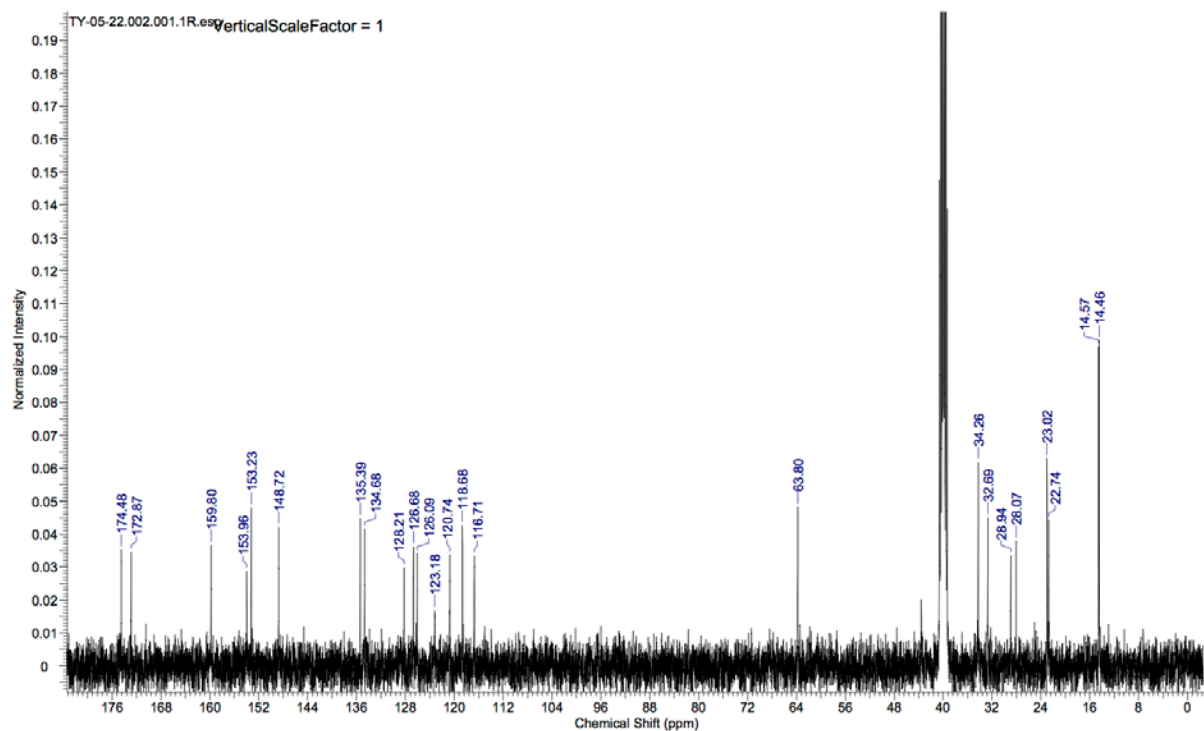

# Methyl 3-((5-nitrobenzo[d]thiazol-2-yl)amino)propanoate (4)

$^1\text{H}$ , 400 MHz,  $\text{CDCl}_3$

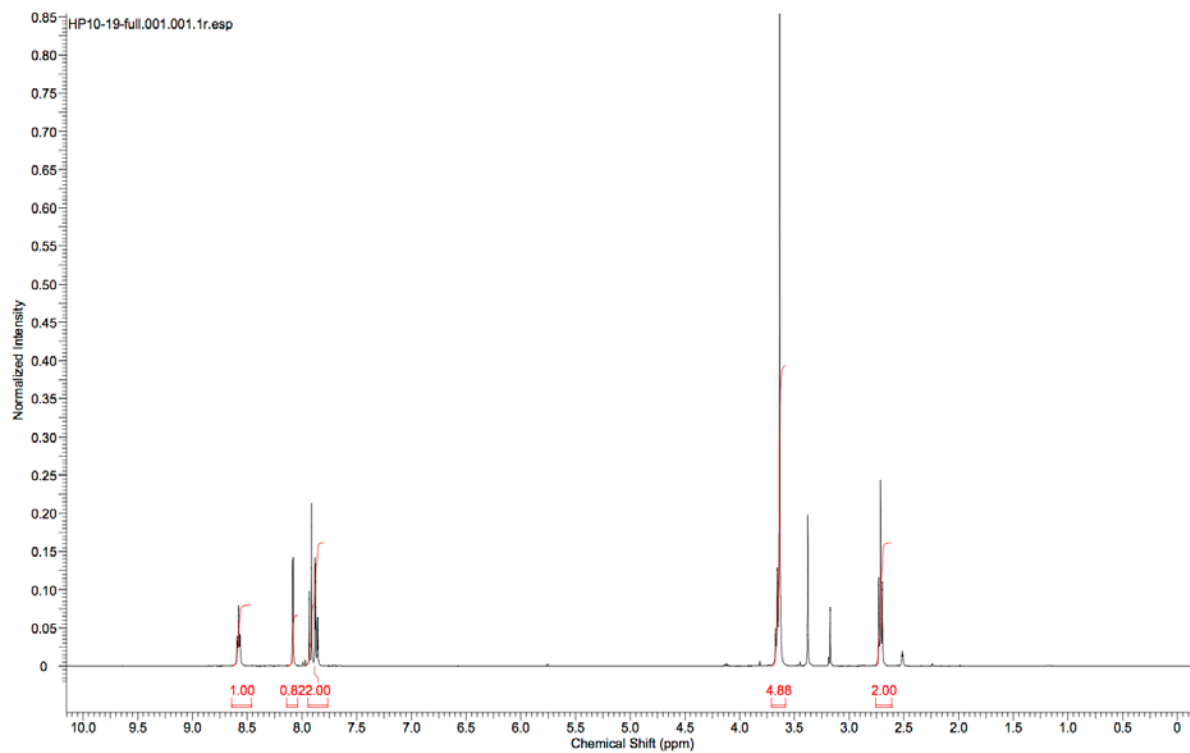

$^{13}\text{C}$ , 101 MHz,  $\text{CDCl}_3$

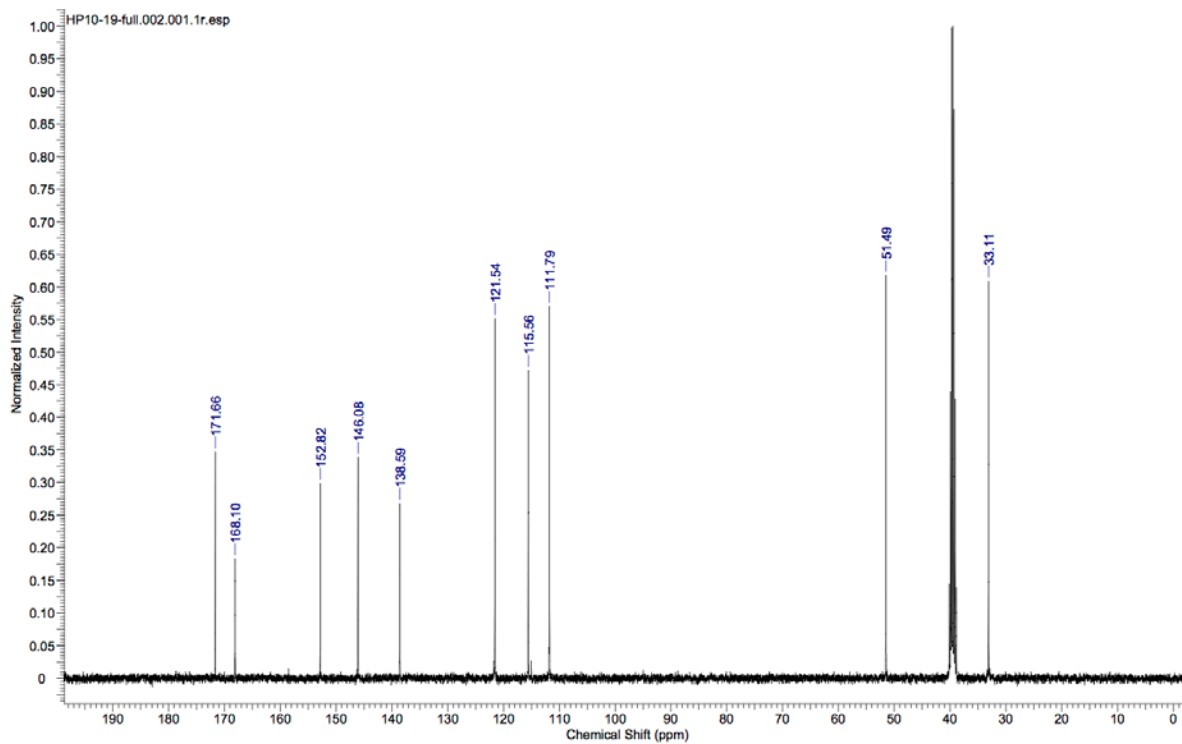

# Methyl 3-((tert-butoxycarbonyl)(5-nitrobenzo[d]thiazol-2-yl)amino)propanoate (7)

$^1\text{H}$ , 400 MHz,  $\text{CDCl}_3$

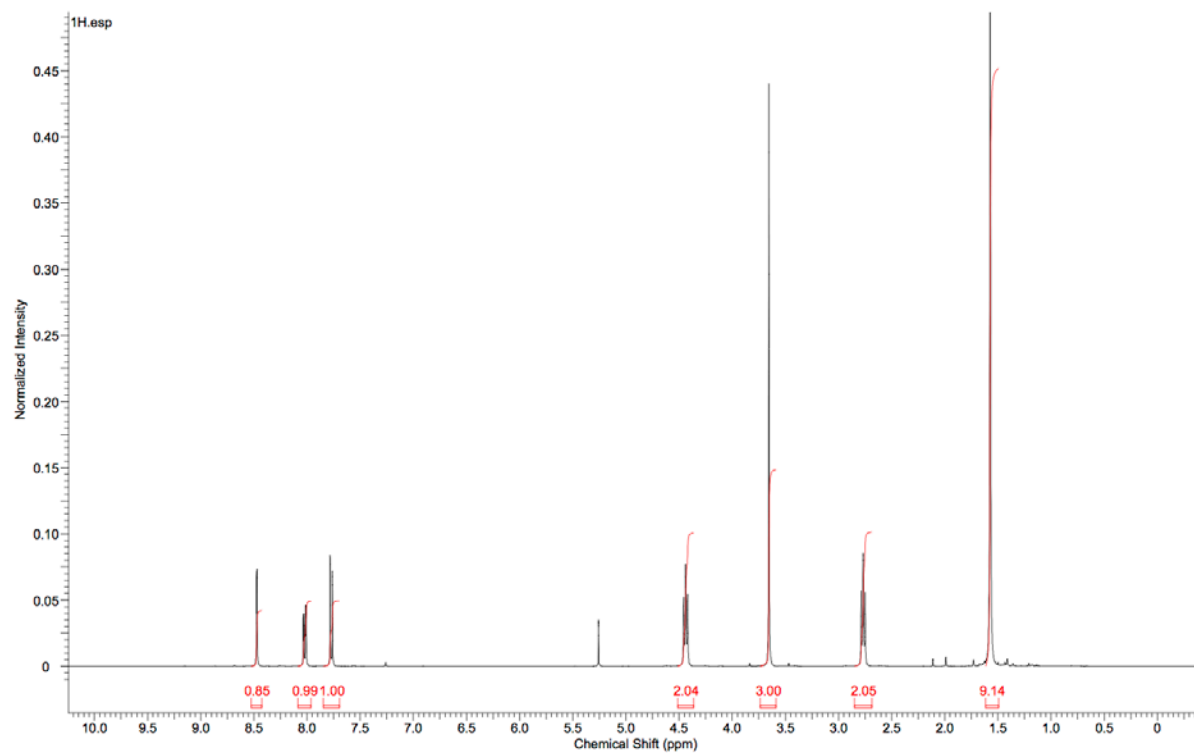

$^{13}\text{C}$ , 101 MHz,  $\text{CDCl}_3$

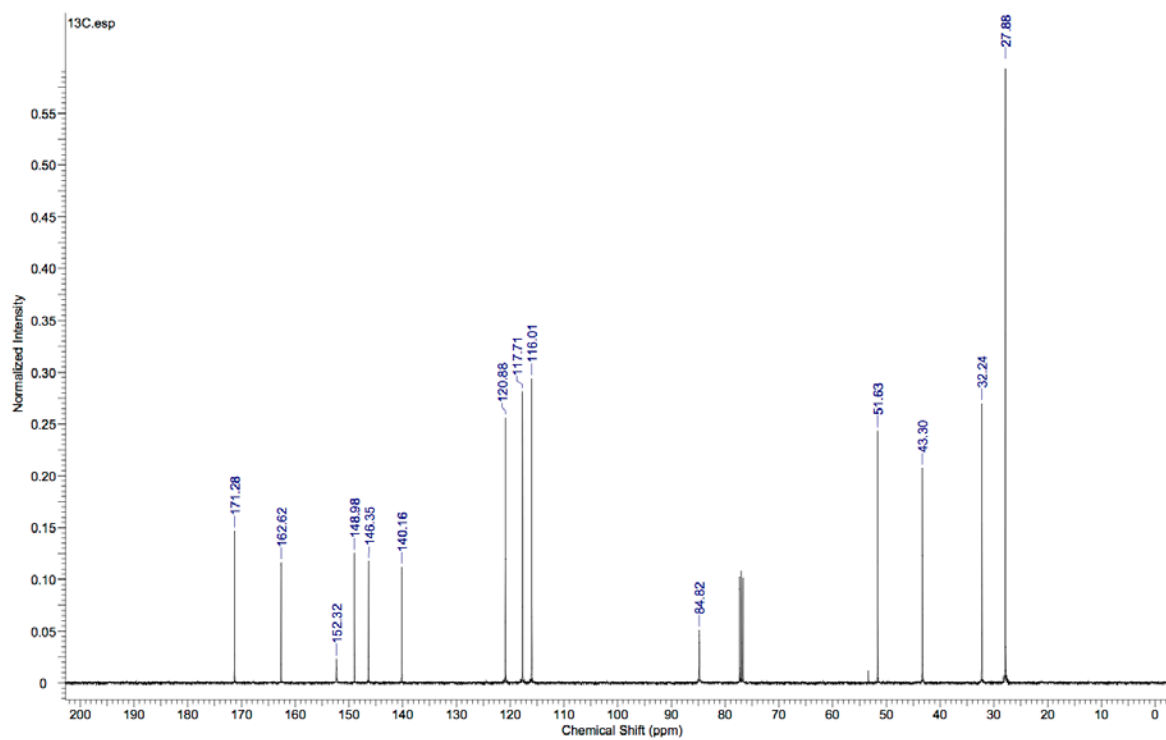

# Methyl 3-((5-aminobenzo[d]thiazol-2-yl)(*tert*-butoxycarbonyl)amino)propanoate (41)

$^1\text{H}$ , 600 MHz,  $\text{CDCl}_3$

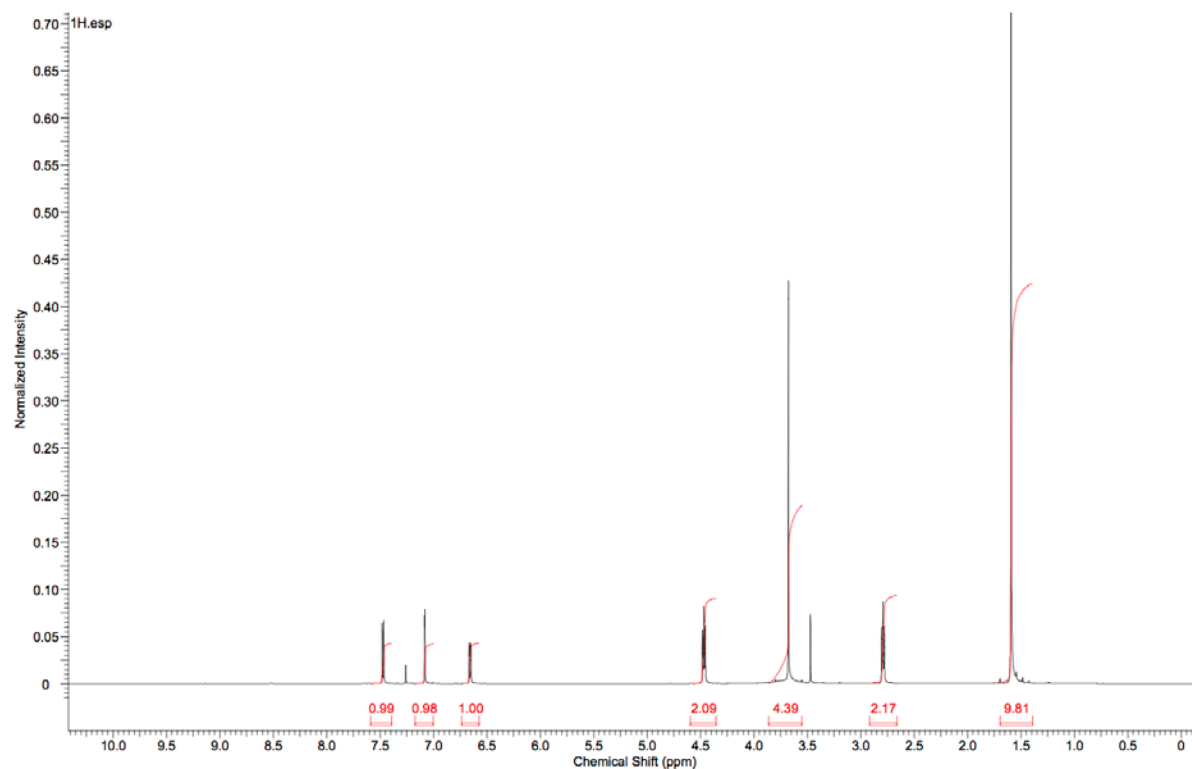

$^{13}\text{C}$ , 151 MHz,  $\text{CDCl}_3$

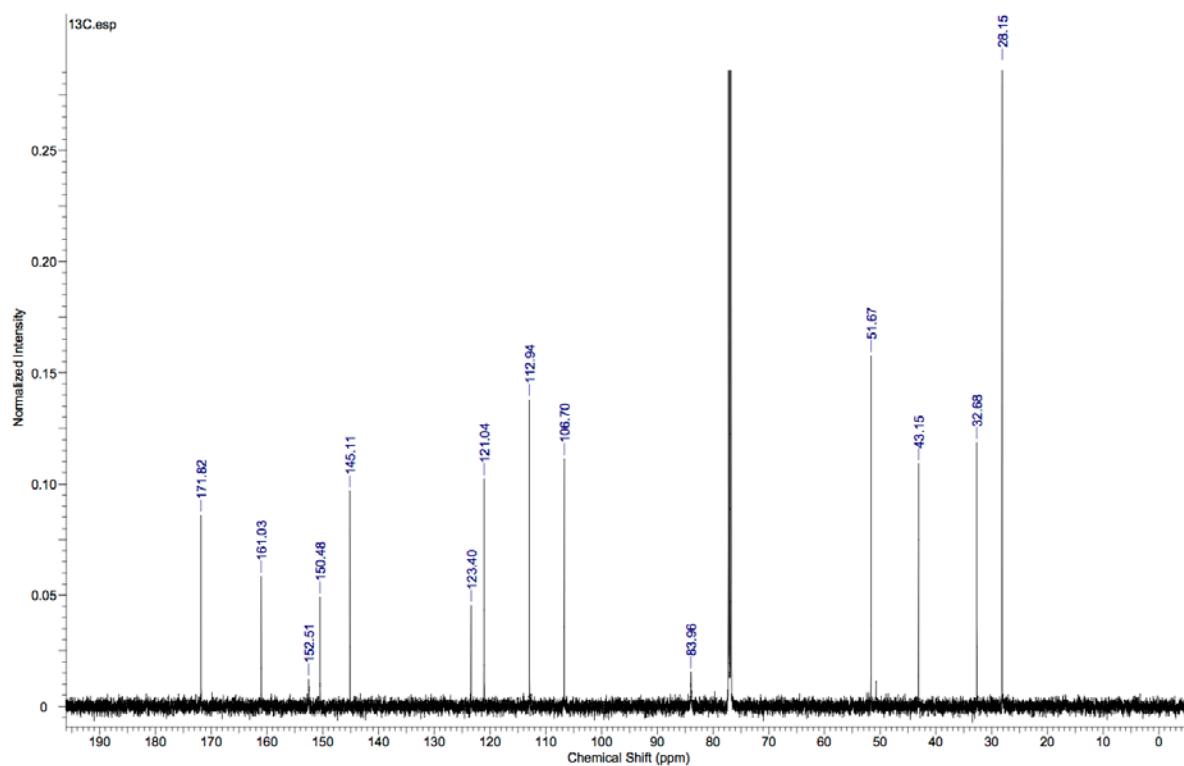

# Methyl 3-((5-amino-4-iodobenzo[d]thiazol-2-yl)(*tert*-butoxycarbonyl)amino)propanoate (10)

$^1\text{H}$ , 500 MHz,  $\text{CDCl}_3$

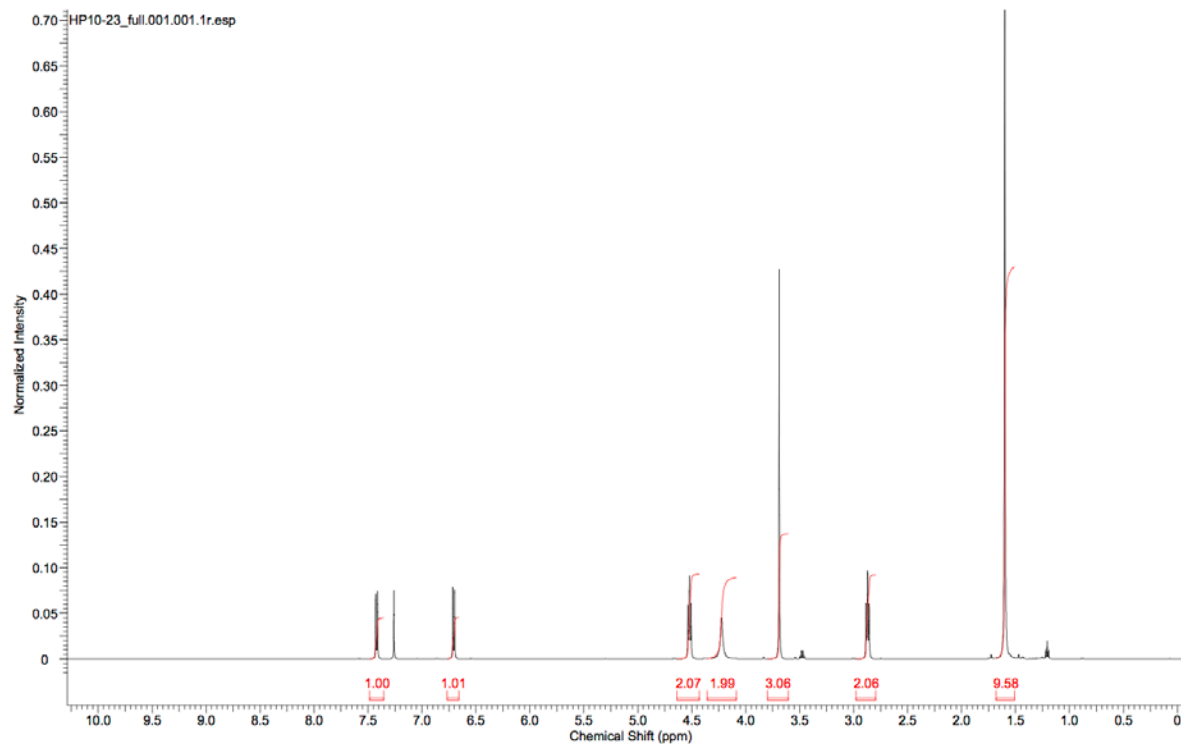

$^{13}\text{C}$ , 126 MHz,  $\text{CDCl}_3$

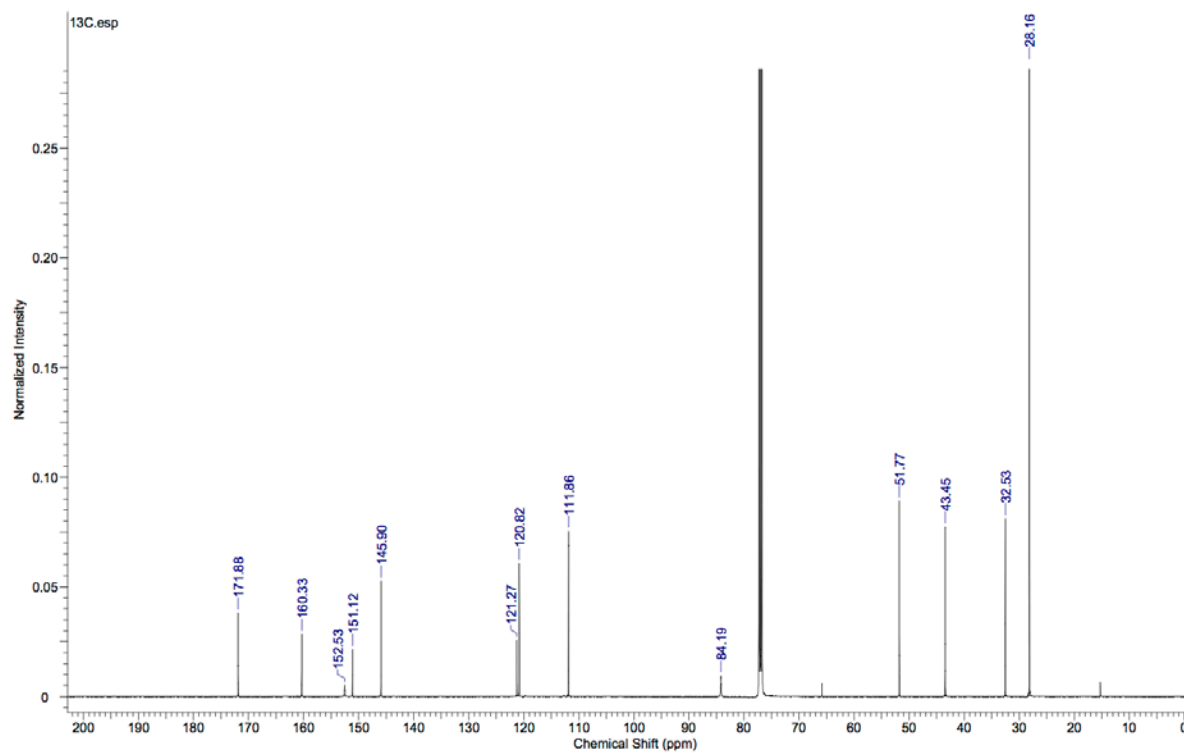

**Methyl 3-((5-amino-4-propylbenzo[*d*]thiazol-2-yl)(*tert*-butoxycarbonyl)amino)propanoate (14)**

**$^1\text{H}$ , 400 MHz,  $\text{CDCl}_3$**

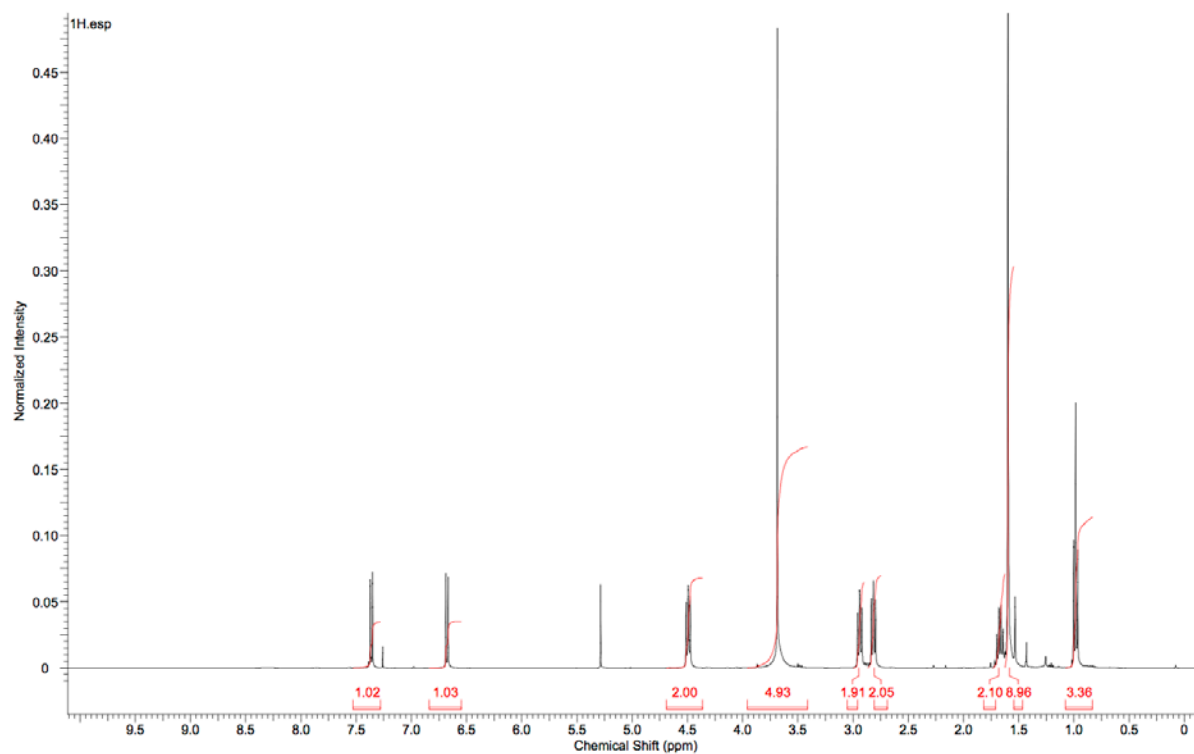

**$^{13}\text{C}$ , 101 MHz,  $\text{CDCl}_3$**

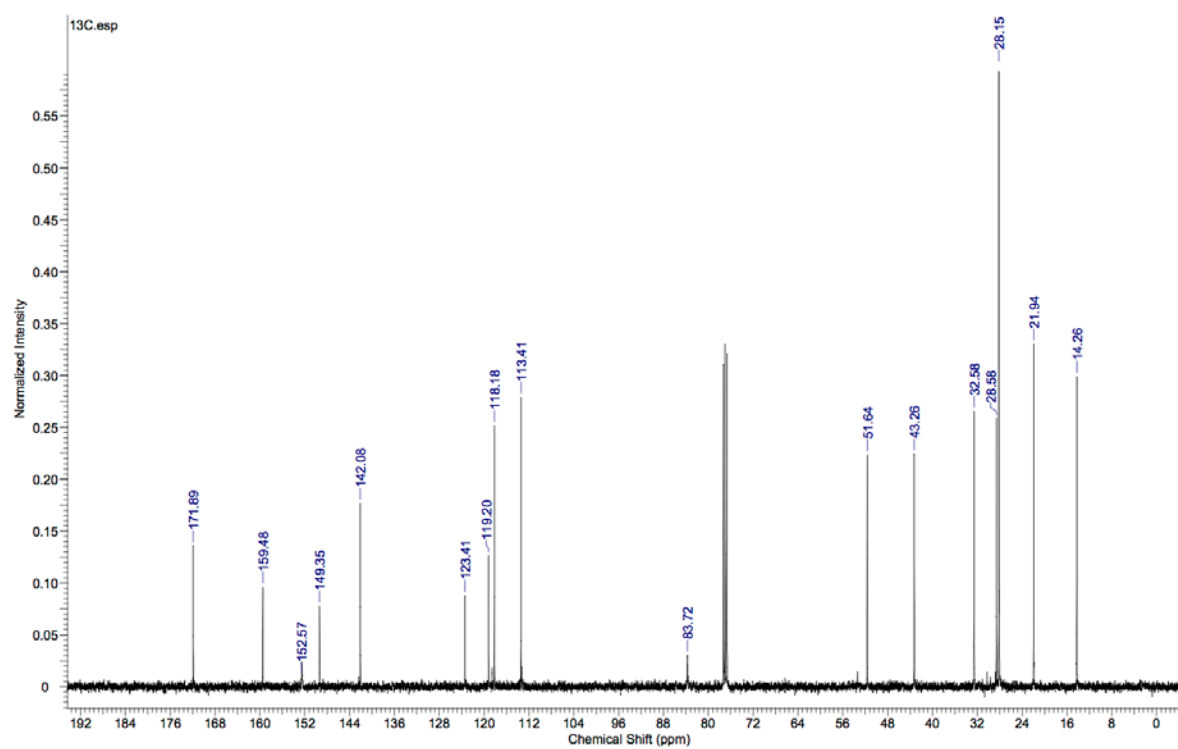



Ethyl 3-(2-(3-(2-((*tert*-butoxycarbonyl)(3-methoxy-3-oxopropyl)amino)-4-propylbenzo[d]thiazol-5-yl)ureido)thiophen-3-yl)propanoate (42)

$^1\text{H}$ , 400 MHz,  $\text{CDCl}_3$

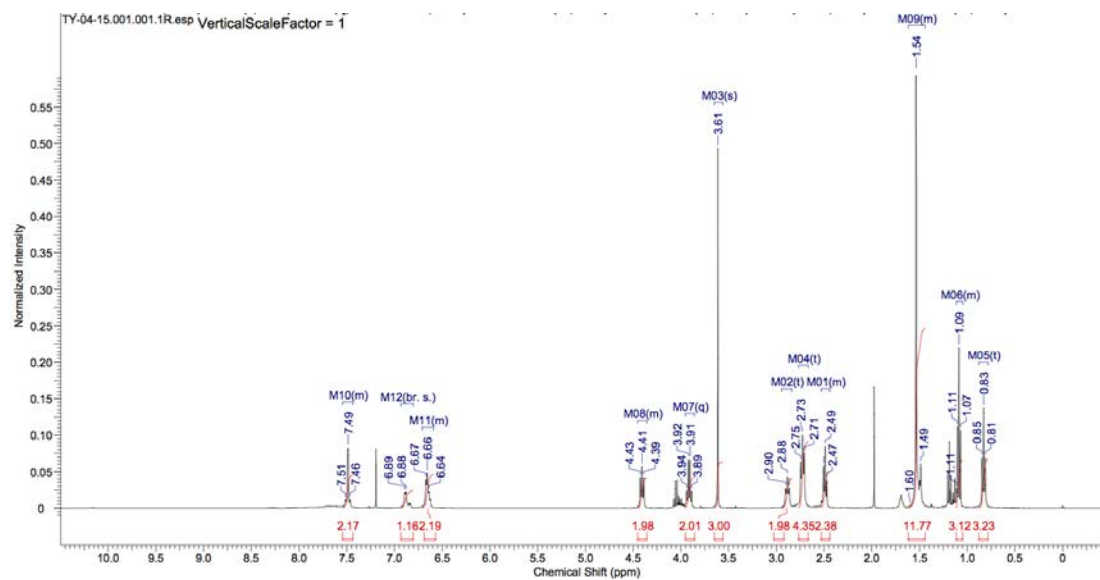

$^{13}\text{C}$ , 126 MHz,  $\text{CDCl}_3$

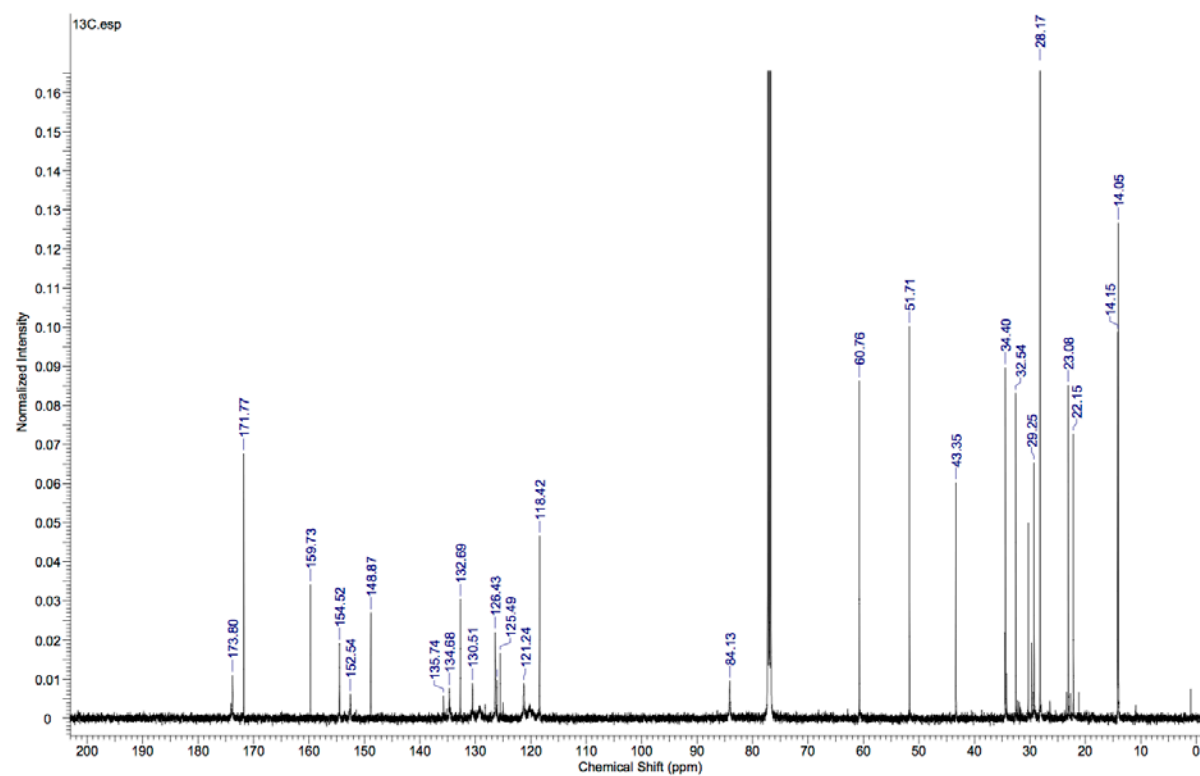

# 3-(2-(3-(2-((*tert*-Butoxycarbonyl)(2-carboxyethyl)amino)-4-propylbenzo[d]thiazol-5-yl)ureido)thiophen-3-yl)propanoic acid (19)

$^1\text{H}$ , 400 MHz,  $\text{CD}_3\text{OD}$

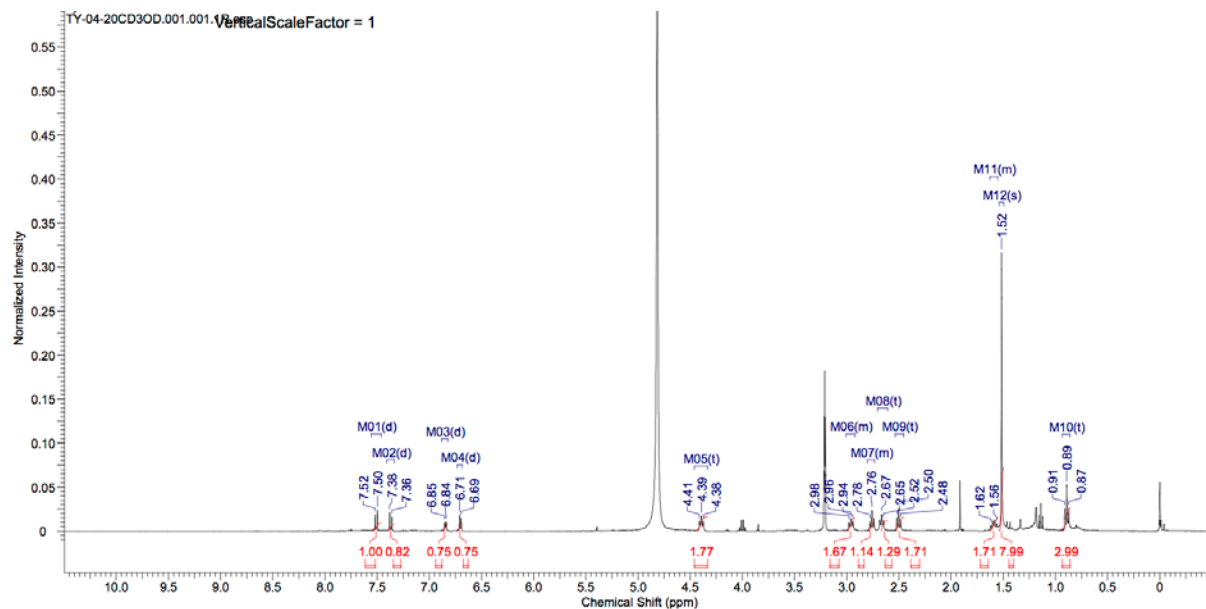

$^{13}\text{C}$ , 101 MHz,  $\text{CD}_3\text{OD}$

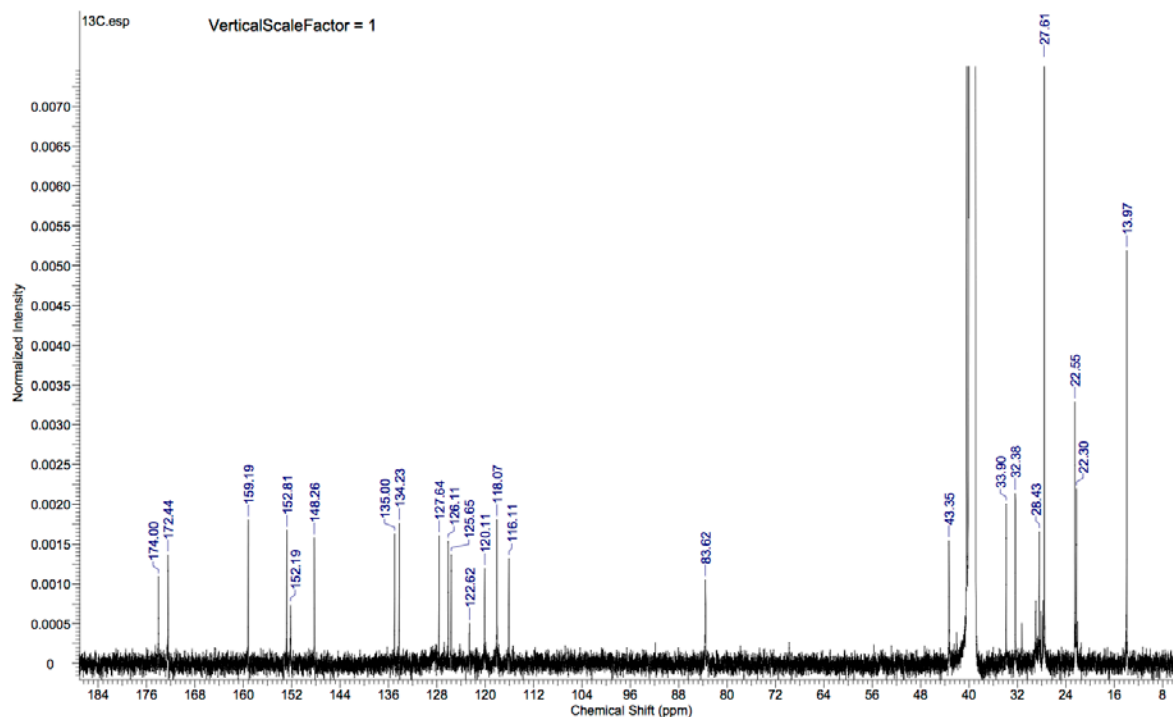

**3-(2-(3-(2-((3-(*tert*-Butoxy)-3-oxopropyl)(ethoxycarbonyl)amino)benzo[d]thiazol-5-yl)ureido)thiophen-3-yl)propanoic acid (43)**

**<sup>1</sup>H, 400 MHz, d<sub>6</sub>-DMSO**

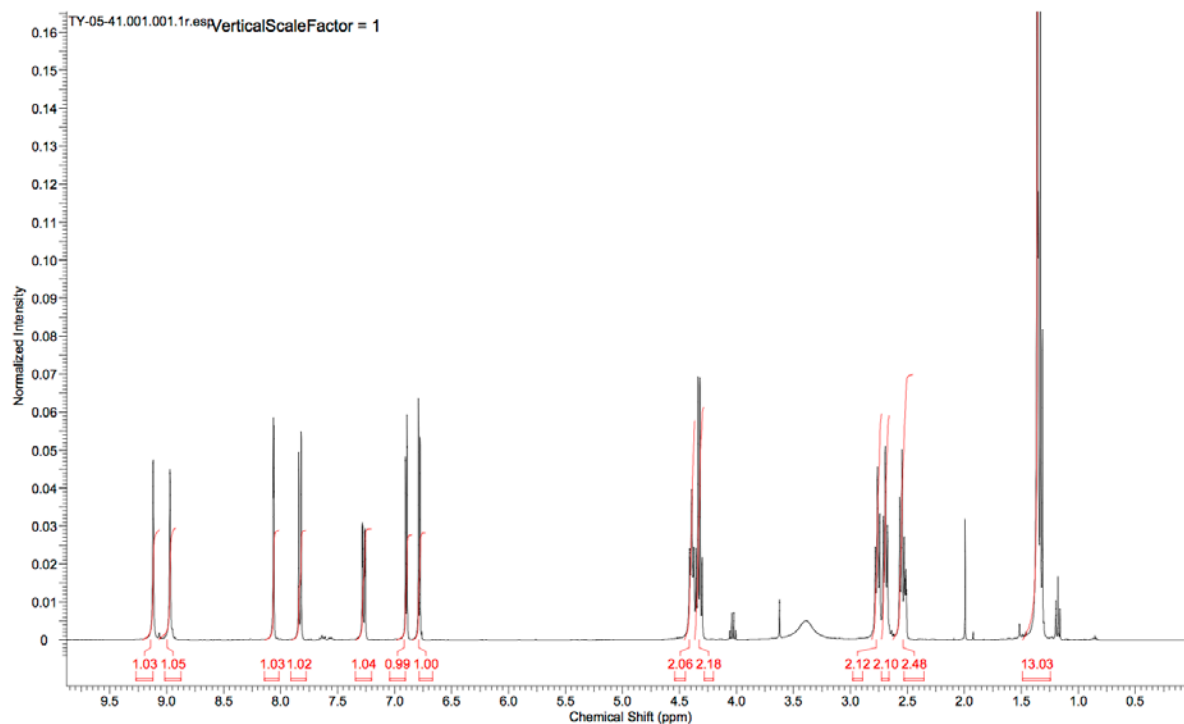

**<sup>13</sup>C, 101 MHz, d<sub>6</sub>-DMSO**

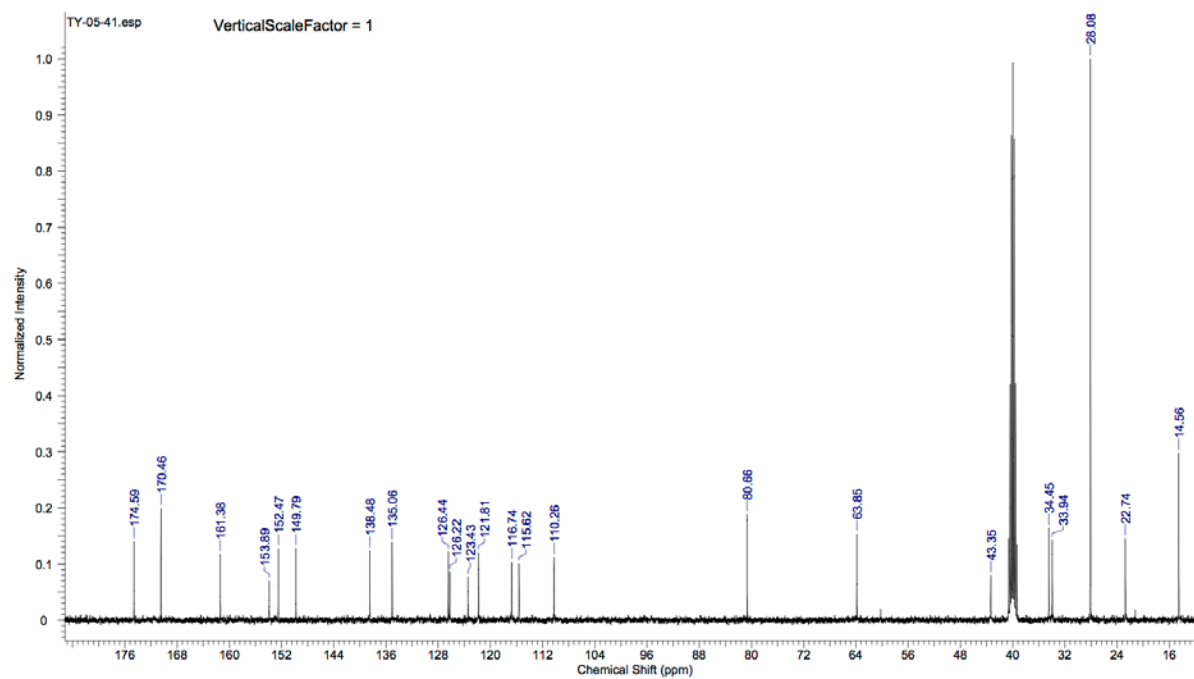

### 3-(2-(3-(2-((2-Carboxyethyl)(ethoxycarbonyl)amino)benzo[d]thiazol-5-yl)ureido)thiophen-3-yl)propanoic acid (23)

$^1\text{H}$ , 400 MHz,  $\text{d}_6\text{-DMSO}$

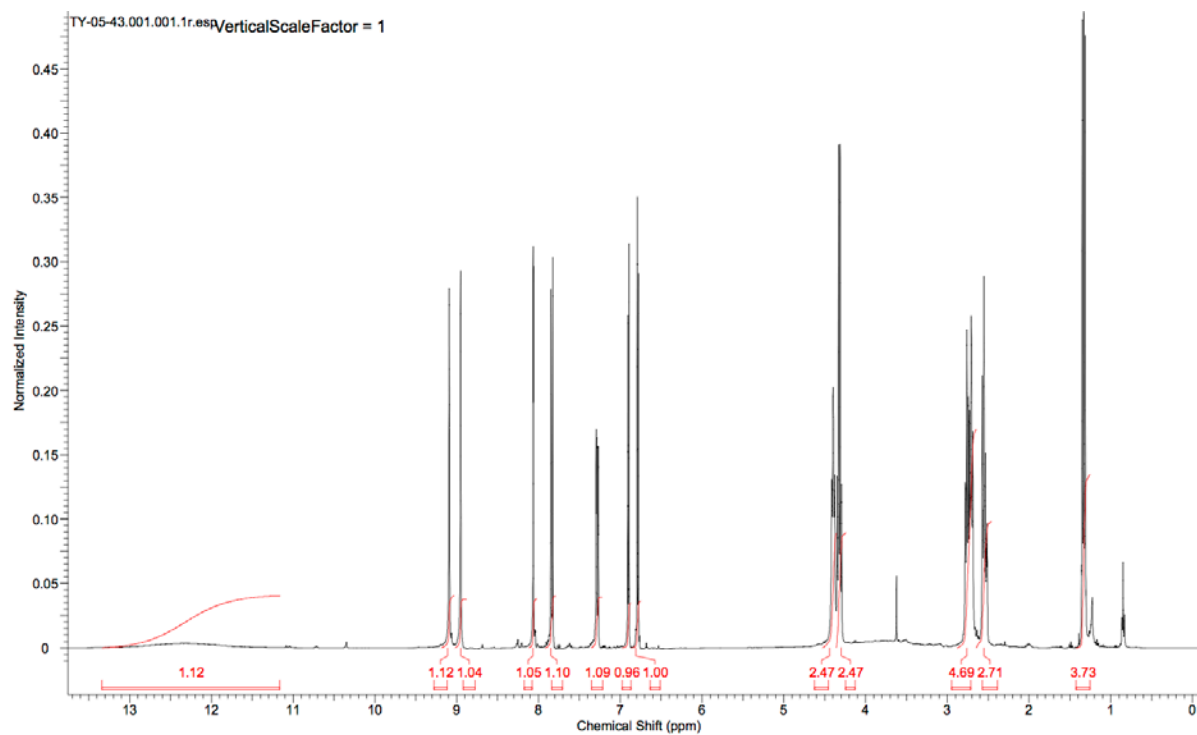

$^{13}\text{C}$ , 101 MHz,  $\text{d}_6\text{-DMSO}$

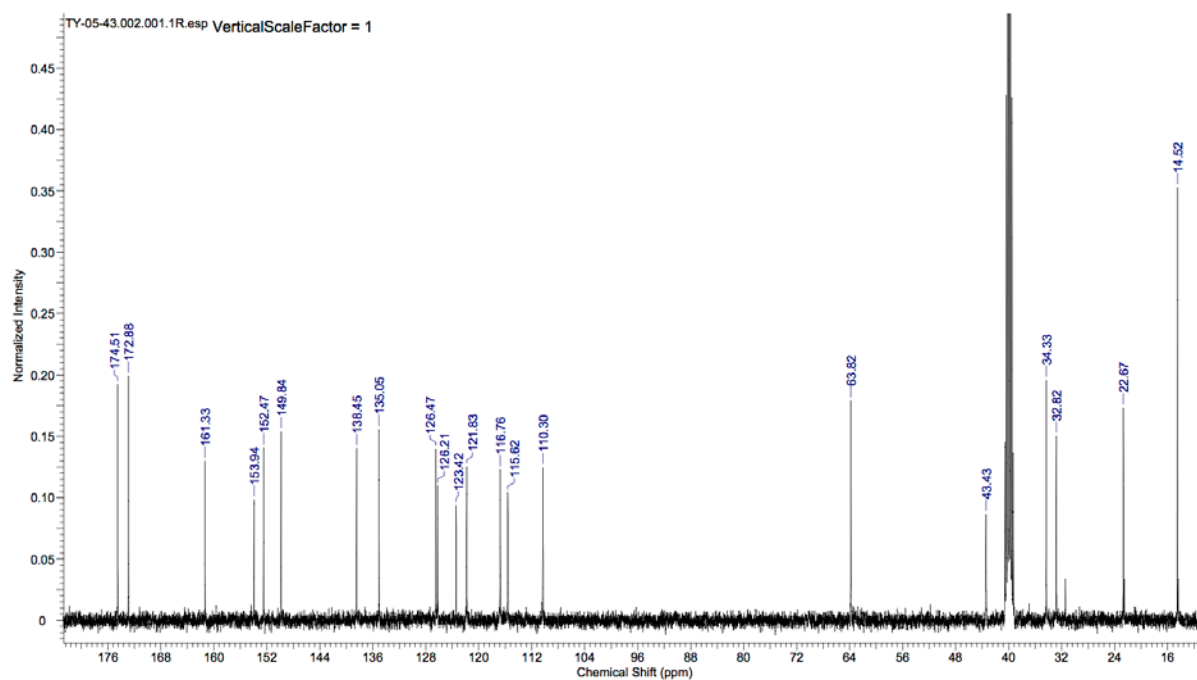

# *tert*-Butyl (5-nitrobenzo[d]thiazol-2-yl)carbamate (45)

$^1\text{H}$ , 400 MHz,  $\text{CDCl}_3$

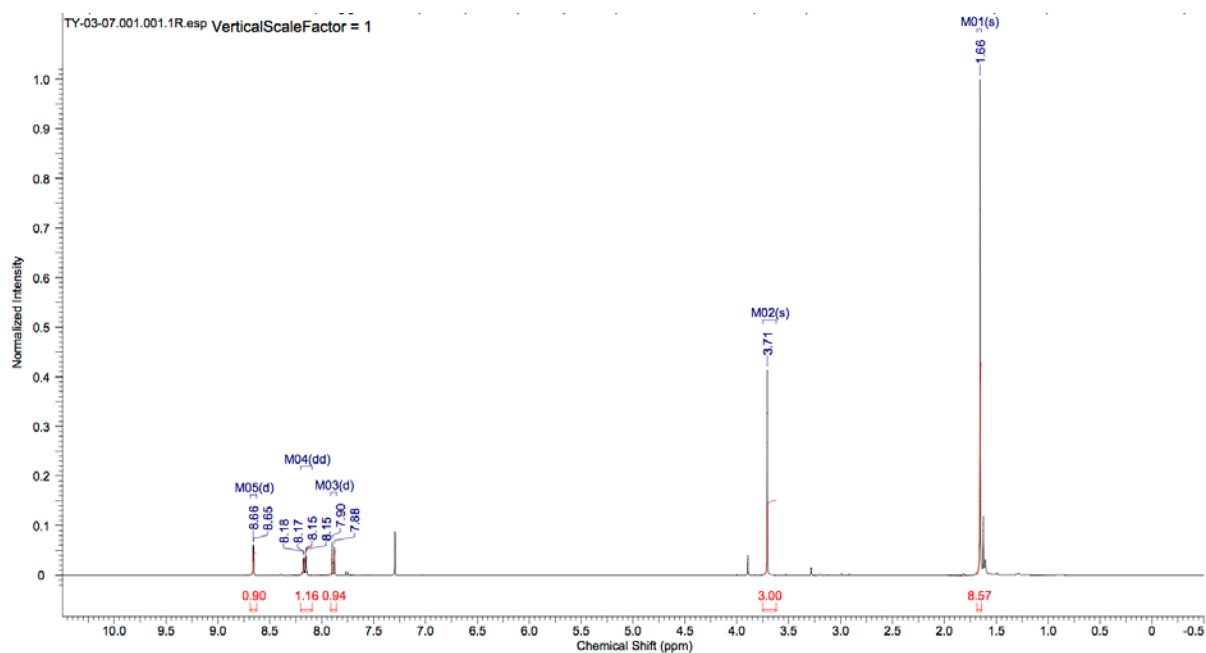

$^{13}\text{C}$ , 101 MHz,  $\text{d}_6\text{-DMSO}$

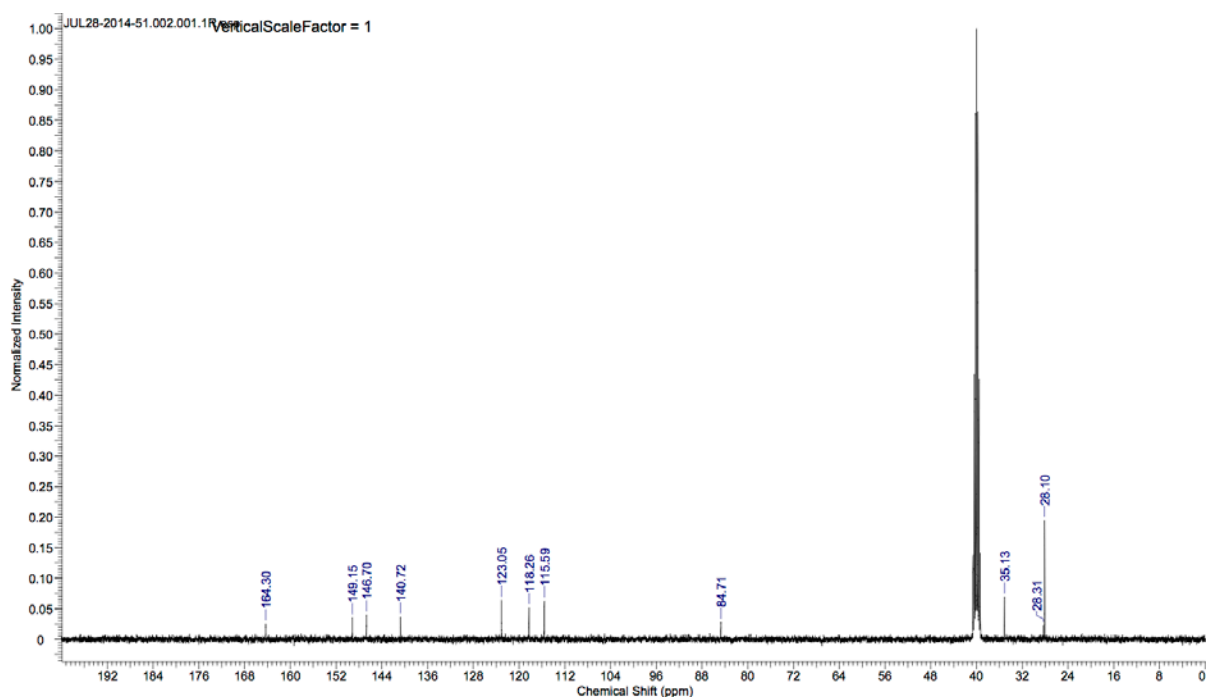

# *tert*-Butyl (5-aminobenzo[d]thiazol-2-yl)(methyl)carbamate (46)

$^1\text{H}$ , 400 MHz,  $\text{CDCl}_3$

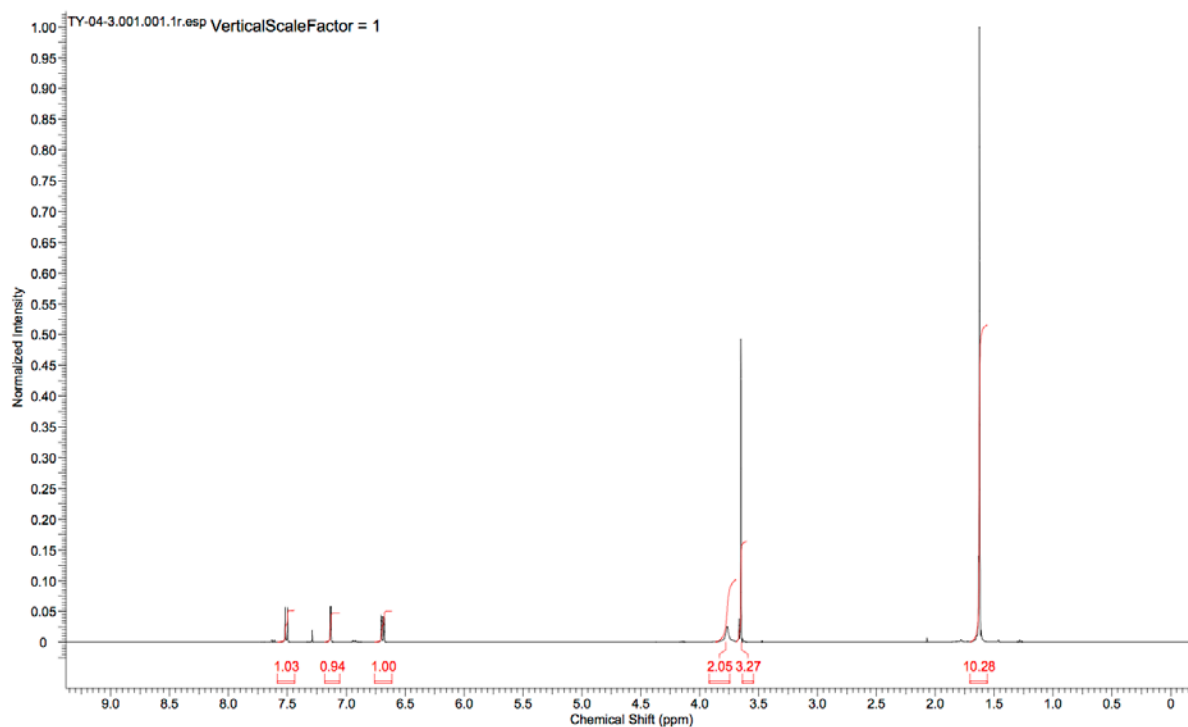

$^{13}\text{C}$ , 101 MHz,  $\text{CDCl}_3$

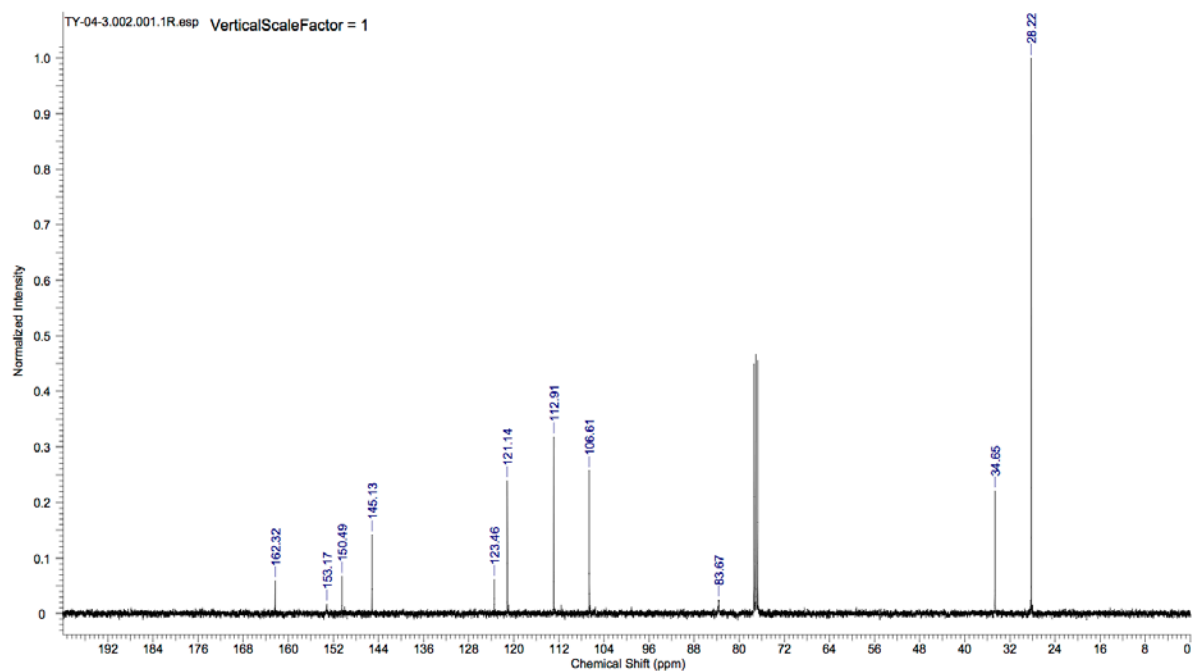

**tert-Butyl (5-amino-4-iodobenzo[d]thiazol-2-yl)(methyl)carbamate (47)**

**$^1\text{H}$ , 400 MHz,  $\text{CDCl}_3$**

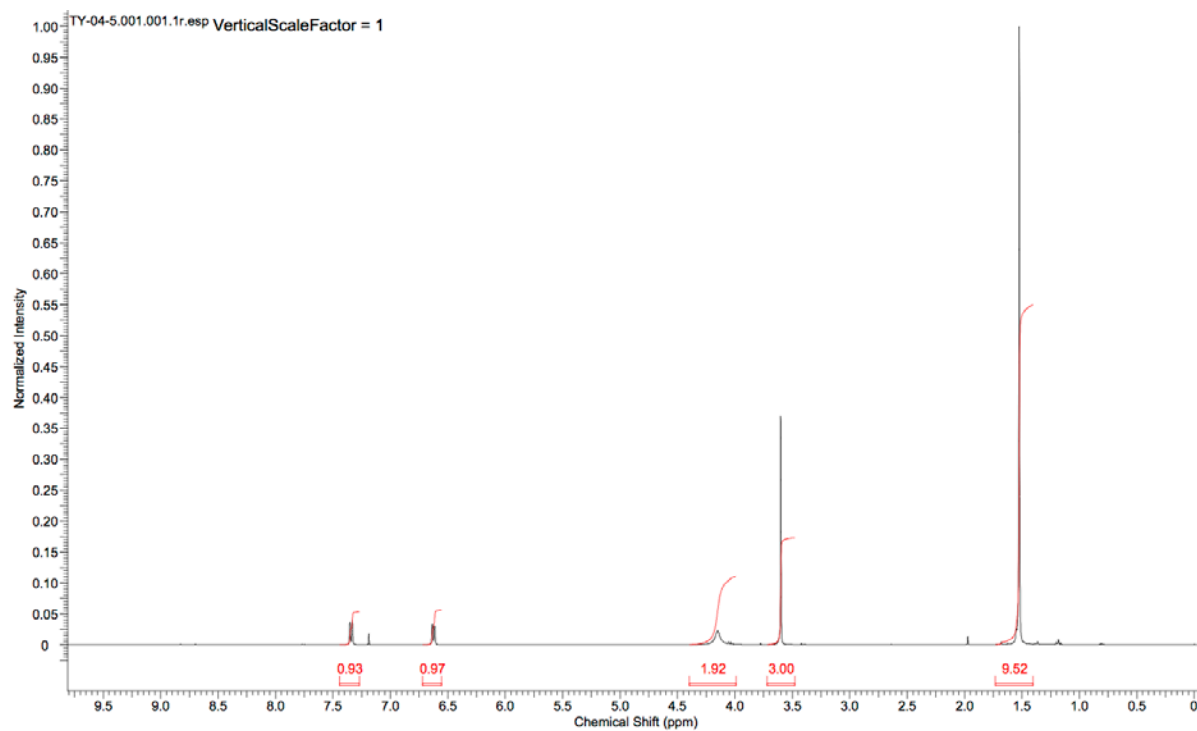

**$^{13}\text{C}$ , 101 MHz,  $\text{CDCl}_3$**

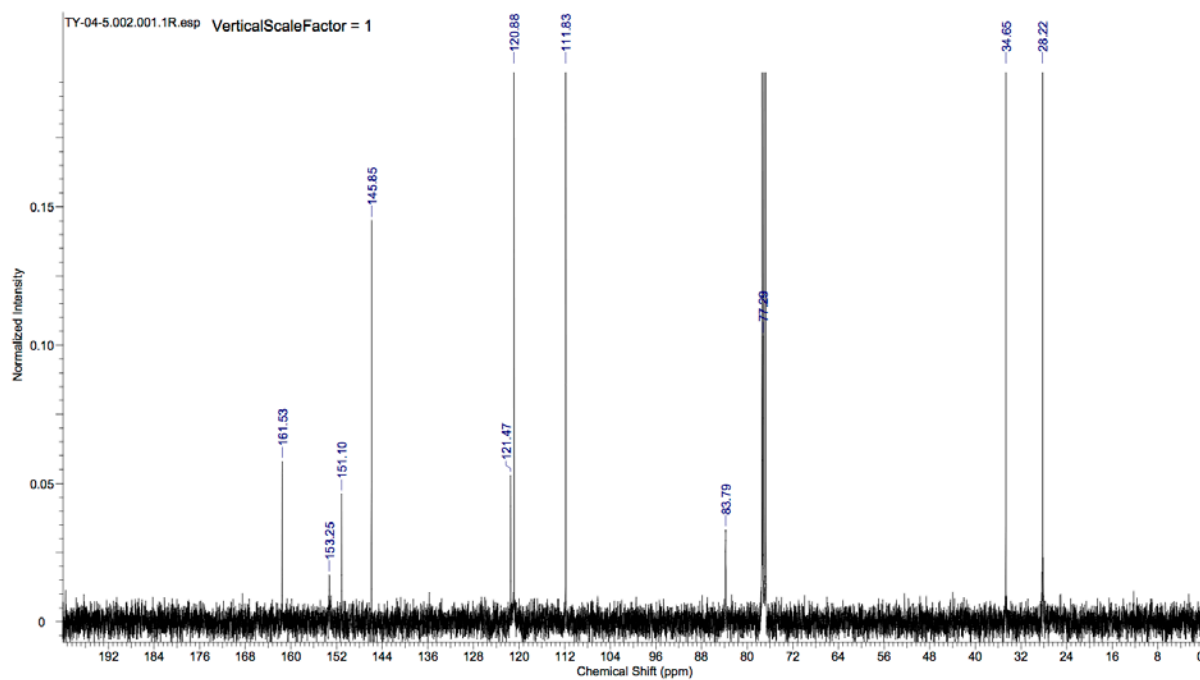

Diethyl 2,2'-((((2-((*tert*-butoxycarbonyl)(methyl)amino)-4-iodobenzo[*d*]thiazol-5-yl)azanediy))bis(carbonyl))bis(azanediy))bis(5-ethylthiophene-3-carboxylate) (49)

$^1\text{H}$ , 400 MHz,  $\text{CDCl}_3$

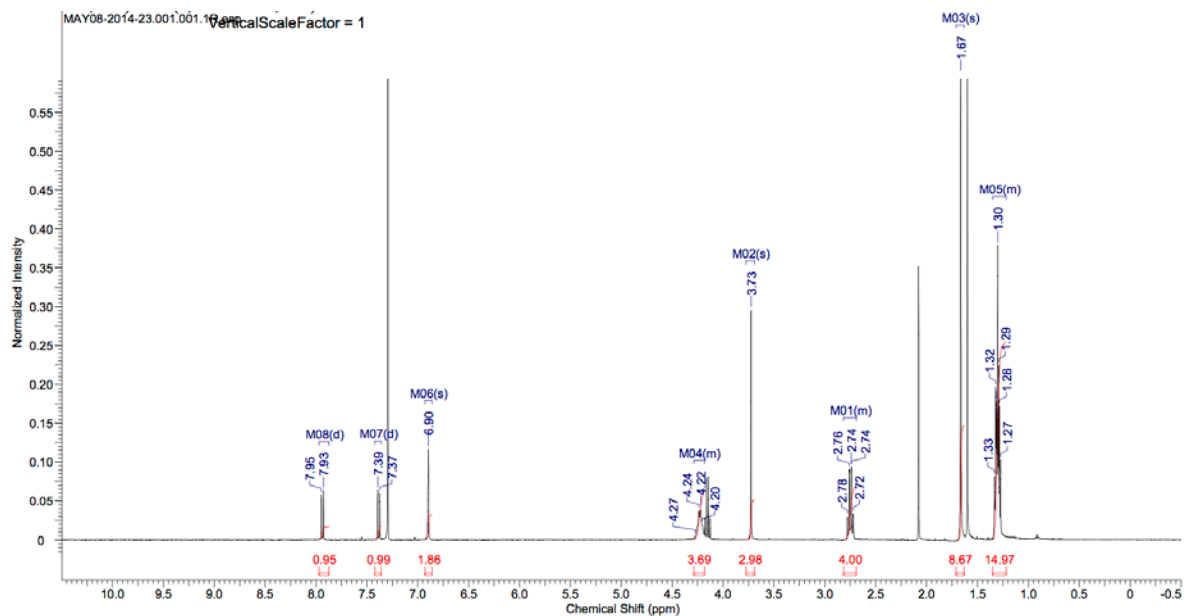

$^{13}\text{C}$ , 101 MHz,  $\text{CDCl}_3$

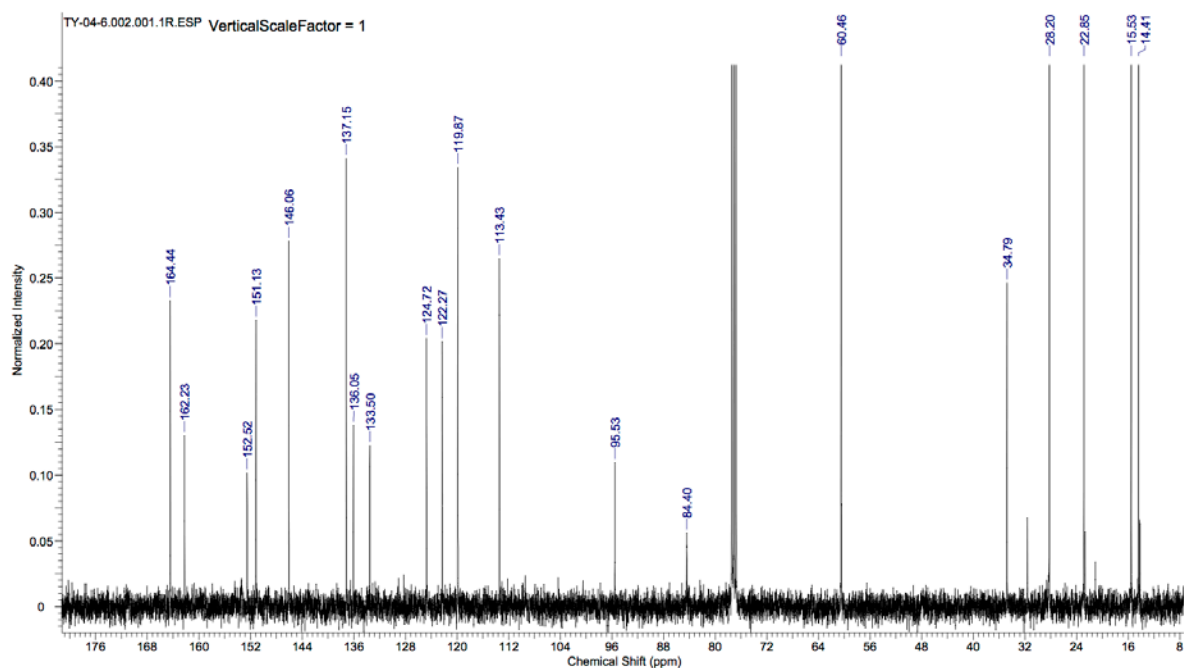



**Ethyl 2-(3-(2-((*tert*-butoxycarbonyl)(methyl)amino)-4-iodobenzo[d]thiazol-5-yl)ureido)-5-ethylthiophene-3-carboxylate (24)**

<sup>1</sup>H, 400 MHz, CDCl<sub>3</sub>

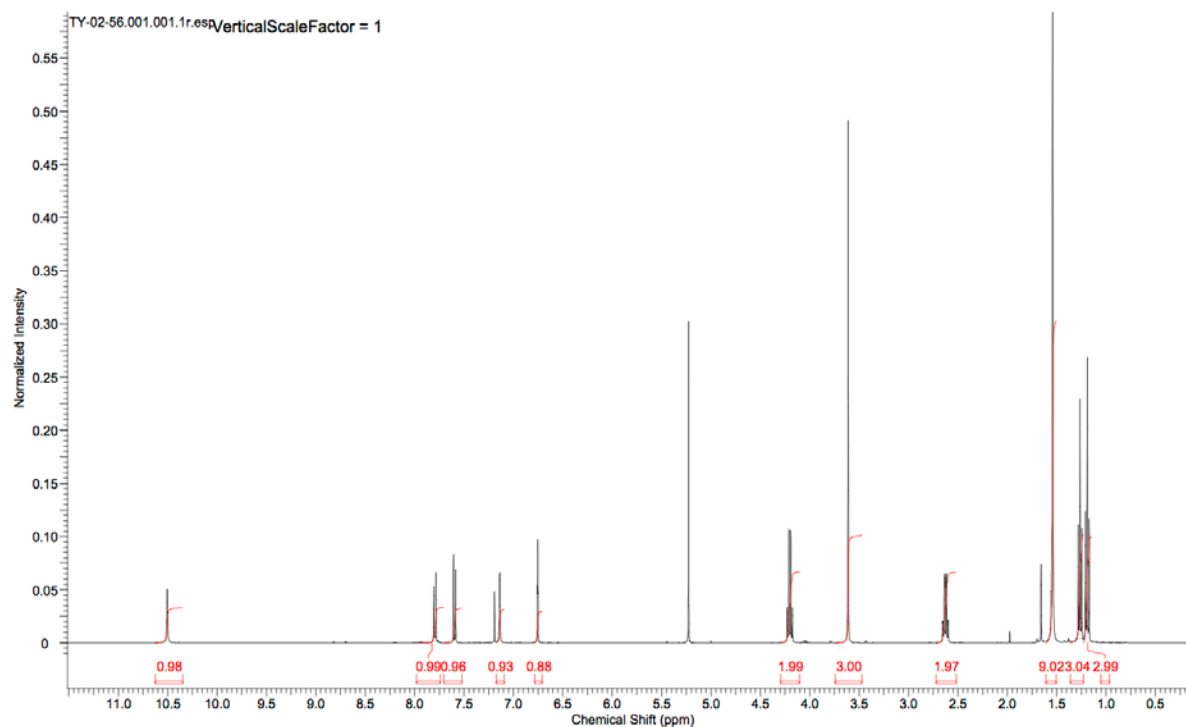

<sup>13</sup>C, 101 MHz, CDCl<sub>3</sub>

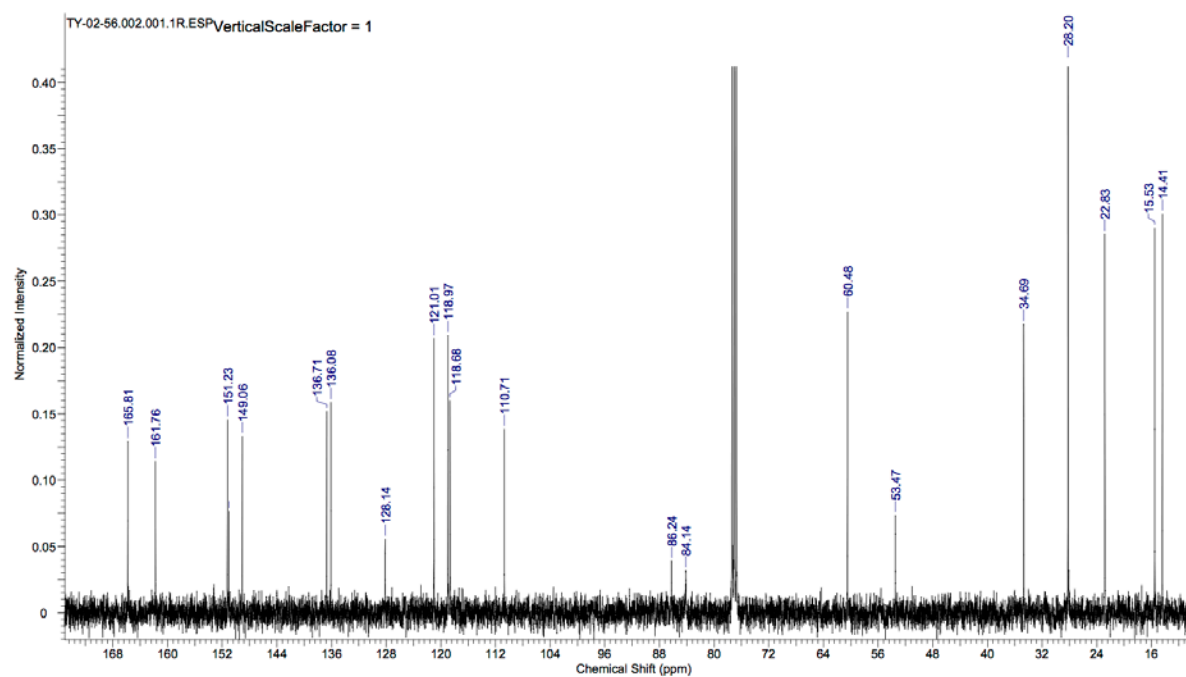

## 7. References

- 1 US Pat., 7514460B2, 2009.
- 2 H. Nowell, S. A. Barnett, K. E. Christensen, S. J. Teat and D. R. Allan, *J. Synchrotron Rad.*, 2012, **19**, 435–441.
- 3 L. Palatinus and G. Chapuis, *J. Appl. Cryst.*, 2007, **40**, 786–790.
- 4 P. W. Betteridge, J. R. Carruthers, R. I. Cooper, K. Prout and D. J. Watkin, *J. Appl. Cryst.*, 2003, **36**, 1487–1487.
- 5 R. I. Cooper, A. L. Thompson and D. J. Watkin, *J. Appl. Cryst.*, 2010, **43**, 1100–1107.
- 6 J. Luo, C.-H. Yu, H. Yu, R. Borstnar, S. C. L. Kamerlin, A. Gräslund, J. P. Abrahams and S. K. T. S. Wärmländer, *ACS Chem. Neurosci.*, 2013, **4**, 454–462.
- 7 A. Savitzky and M. J. E. Golay, *Anal. Chem.*, 1964, **36**, 1627–1639.
- 8 Maestro, version 10.2, Schrödinger, LLC, New York, NY, 2015.
- 9 Jaguar, version 8.8, Schrödinger, LLC, New York, NY, 2015.
- 10 Y. Zhao and D. G. Truhlar, *Theor. Chem. Account*, 2007, **120**, 215–241.
- 11 W. J. Hehre, R. Ditchfield and J. A. Pople, *J. Chem. Phys.*, 1972, **56**, 2257–2261.
- 12 P. C. Hariharan and J. A. Pople, *Theoret. Chim. Acta*, 1973, **28**, 213–222.
- 13 R. J. Woods, M. Khalil, W. Pell, S. H. Moffat and V. H. Smith, *J. Comput. Chem.*, 1990, **11**, 297–310.
